# Supplementary material
Source: publisher figshare collection journal article supplement (https://gsajournals.figshare.com/ndownloader/files/22312587)
Supplement: Supplementary file 1 [file 22312587]

## Sheet: rpt3 mutant
SGDID	Systematic	Gene	Gene Name	Alias	Short Description	Description	Length	MW	Systematics	CHROM	POS	ID	REF	ALT	QUAL	FILTER	INFO	GT	AD
S000002802	YDR394W	RPT3	Regulatory Particle Triple-A protein, or Regulatory Particle Triphosphatase	proteasome regulatory particle base subunit RPT3 YNT1 YTA2	ATPase of the 19S regulatory particle of the 26S proteasome	ATPase of the 19S regulatory particle of the 26S proteasome; one of ATPases of the regulatory particle; involved in the degradation of ubiquitinated substrates; substrate of N-acetyltransferase B	428	47886.3	YDR394W	chr04	1267141	.	T	A	225	.	DP=65;VDB=0.359039;SGB=-0.693147;MQSB=0.623394;MQ0F=0;AC=1;AN=1;DP4=0,0,29,34;MQ=57;ANN=A|missense_variant|MODERATE|YDR394W|YDR394W|transcript|TRANSCRIPT_YDR394W|protein_coding|1/1|c.626T>A|p.Val209Asp|626/1287|626/1287|209/428||	GT:PL:AD	1:255,0:0,62
S000004109	YLR119W	SRN2	Suppressor of Rna mutations, Number 2	VPL16 ESCRT-I subunit protein SRN2 VPS37 SRN10	Component of the ESCRT-I complex	Component of the ESCRT-I complex; ESCRT-I is involved in ubiquitin-dependent sorting of proteins into the endosome; suppressor of rna1-1 mutation; may be involved in RNA export from nucleus	213	25106	YLR119W	chr12	386482	.	AA	AACA	189	.	INDEL;IDV=1;IMF=0.0142857;DP=70;VDB=0.00163789;SGB=-0.693147;MQSB=0.994269;MQ0F=0;AC=1;AN=1;DP4=0,0,29,24;MQ=57;ANN=AACA|frameshift_variant&stop_lost|HIGH|YLR119W|YLR119W|transcript|TRANSCRIPT_YLR119W|protein_coding|1/1|c.45_46insCA|p.Ter16fs|46/640|46/640|16/212||WARNING_TRANSCRIPT_MULTIPLE_STOP_CODONS;LOF=(YLR119W|YLR119W|1|1.00)	GT:PL:AD	1:219,0:0,53
S000004109	YLR119W	SRN2	Suppressor of Rna mutations, Number 2	VPL16 ESCRT-I subunit protein SRN2 VPS37 SRN10	Component of the ESCRT-I complex	Component of the ESCRT-I complex; ESCRT-I is involved in ubiquitin-dependent sorting of proteins into the endosome; suppressor of rna1-1 mutation; may be involved in RNA export from nucleus	213	25106	YLR119W	chr12	386483	.	A	AAC	177	.	INDEL;IDV=1;IMF=0.0142857;DP=70;VDB=0.00092847;SGB=-0.693147;MQSB=0.994269;MQ0F=0;AC=1;AN=1;DP4=0,0,29,24;MQ=57;ANN=AAC|frameshift_variant&stop_lost|HIGH|YLR119W|YLR119W|transcript|TRANSCRIPT_YLR119W|protein_coding|1/1|c.45_46insAC|p.Ter16fs|46/640|46/640|16/212||WARNING_TRANSCRIPT_MULTIPLE_STOP_CODONS;LOF=(YLR119W|YLR119W|1|1.00)	GT:PL:AD	1:207,0:0,53
S000000815	YER013W	PRP22	Pre-mRNA Processing	DEAH-box ATP-dependent RNA helicase PRP22	DEAH-box RNA-dependent ATPase/ATP-dependent RNA helicase	DEAH-box RNA-dependent ATPase/ATP-dependent RNA helicase; associates with lariat intermediates before the second catalytic step of splicing; mediates ATP-dependent mRNA release from the spliceosome and unwinds RNA duplexes; required for proofreading the exon ligation reaction	1145	130014	YER013W	chr05	179253	.	G	A	225	.	DP=111;VDB=0.421533;SGB=-0.693147;MQSB=0.973735;MQ0F=0;AC=1;AN=1;DP4=0,0,60,43;MQ=58;ANN=A|missense_variant|MODERATE|YER013W|YER013W|transcript|TRANSCRIPT_YER013W|protein_coding|1/1|c.265G>A|p.Val89Ile|265/3438|265/3438|89/1145||	GT:PL:AD	1:255,0:0,103
S000004414	YLR422W	DCK1	DoCK1 homolog	None	Dock family protein (Dedicator Of CytoKinesis), homolog of human DOCK1	Dock family protein (Dedicator Of CytoKinesis), homolog of human DOCK1; upstream component for regulation through the small GTPase Rho5p; may form a complex with Lmo1p that acts as a GEF for Rho5p; interacts with Ino4p; cytoplasmic protein that relocates to mitochondria under oxidative stress; implicated in mitophagy; not an essential protein; DOCK proteins act as guanine nucleotide exchange fact…	1932	221569	YLR422W	chr12	959011	.	C	T	225	.	DP=111;VDB=0.000155827;SGB=-0.693147;MQSB=0.983939;MQ0F=0;AC=1;AN=1;DP4=0,0,64,38;MQ=58;ANN=T|missense_variant|MODERATE|YLR422W|YLR422W|transcript|TRANSCRIPT_YLR422W|protein_coding|1/1|c.370C>T|p.Pro124Ser|370/5799|370/5799|124/1932||	GT:PL:AD	1:255,0:0,102
S000007259	Q0032	None	None	ORF8	Dubious open reading frame	Dubious open reading frame; unlikely to encode a functional protein, based on available experimental and comparative sequence data	96	12477.2	Q0032	chrm	22482	.	AT	ATTACT	228	.	INDEL;IDV=2;IMF=0.05;DP=40;VDB=0.0299612;SGB=-0.693127;MQSB=0.34375;MQ0F=0;AC=1;AN=1;DP4=0,1,2,31;MQ=48;ANN=ATTACT|frameshift_variant|HIGH|Q0032|Q0032|transcript|TRANSCRIPT_Q0032|protein_coding|1/1|c.263_264insTACT|p.Met88fs|264/287|264/287|88/94||WARNING_TRANSCRIPT_INCOMPLETE;LOF=(Q0032|Q0032|1|1.00)	GT:PL:AD	1:255,0:1,32
S000001260	YHR217C	None	None	None	Dubious open reading frame	Dubious open reading frame; unlikely to encode a functional protein, based on available experimental and comparative sequence data; located in the telomeric region TEL08R	153	17082.8	YHR217C	chr08	554775	.	TGGG	TGGGGG	179	.	INDEL;IDV=5;IMF=0.0328947;DP=152;VDB=0.234561;SGB=-0.693147;MQSB=0.0357132;MQ0F=0.0789474;AC=1;AN=1;DP4=0,0,63,31;MQ=37;ANN=TGGGGG|frameshift_variant|HIGH|YHR217C|YHR217C|transcript|TRANSCRIPT_YHR217C|protein_coding|1/1|c.543_544insCC|p.Thr183fs|543/2577|543/2577|181/858||WARNING_TRANSCRIPT_MULTIPLE_STOP_CODONS;LOF=(YHR217C|YHR217C|1|1.00)	GT:PL:AD	1:209,0:0,94
S000002320	YDL161W	ENT1	Epsin N-Terminal homology	epsin	Epsin-like protein involved in endocytosis and actin patch assembly	Epsin-like protein involved in endocytosis and actin patch assembly; functionally redundant with Ent2p; binds clathrin via a clathrin-binding domain motif at C-terminus; relocalizes from bud neck to cytoplasm upon DNA replication stress; ENT1 has a paralog, ENT2, that arose from the whole genome duplication	454	52346.4	YDL161W	chr04	170196	.	CAGTTGCAACAACAA	CAGTTGCAACAACAATAGTTGCAACAACAA	23.6539	.	INDEL;IDV=1;IMF=0.0078125;DP=128;VDB=0.921198;SGB=-0.693147;MQSB=0.853535;MQ0F=0;AC=1;AN=1;DP4=17,20,30,36;MQ=34;ANN=CAGTTGCAACAACAATAGTTGCAACAACAA|stop_gained&conservative_inframe_insertion|HIGH|YDL161W|YDL161W|transcript|TRANSCRIPT_YDL161W|protein_coding|1/1|c.786_787insTAGTTGCAACAACAA|p.Gln262_Pro263insTerLeuGlnGlnGln|787/1365|787/1365|263/454||	GT:PL:AD	1:255,204:37,66
S000001402	YIL140W	AXL2	AXiaL 2 bud site selection	SRO4 BUD10	Integral plasma membrane protein	Integral plasma membrane protein; required for axial budding in haploid cells; localizes to the incipient bud site and bud neck; glycosylated by Pmt4p; potential Cdc28p substrate	823	90751.9	YIL140W	chr09	87899	.	G	T	225	.	DP=207;VDB=0.000600787;SGB=-0.693147;MQSB=0.913268;MQ0F=0;AC=1;AN=1;DP4=0,0,94,102;MQ=58;ANN=T|missense_variant|MODERATE|YIL140W|YIL140W|transcript|TRANSCRIPT_YIL140W|protein_coding|1/1|c.1088G>T|p.Gly363Val|1088/2472|1088/2472|363/823||	GT:PL:AD	1:255,0:0,196
S000001254	YHR211W	FLO5	FLOcculation	flocculin FLO5	Lectin-like cell wall protein (flocculin) involved in flocculation	Lectin-like cell wall protein (flocculin) involved in flocculation; binds mannose chains on the surface of other cells, confers floc-forming ability that is chymotrypsin resistant but heat labile; important for co-flocculation with other yeasts, mediating interaction with specific species; FLO5 has a paralog, FLO1, that arose from a segmental duplication	1075	111927	YHR211W	chr08	523719	.	C	G	100	.	DP=10;VDB=0.00214876;SGB=-0.662043;MQ0F=0;AC=1;AN=1;DP4=0,0,9,0;MQ=29;ANN=G|missense_variant|MODERATE|YHR211W|YHR211W|transcript|TRANSCRIPT_YHR211W|protein_coding|1/1|c.1775C>G|p.Thr592Ser|1775/3345|1775/3345|592/1114||	GT:PL:AD	1:130,0:0,9
S000001254	YHR211W	FLO5	FLOcculation	flocculin FLO5	Lectin-like cell wall protein (flocculin) involved in flocculation	Lectin-like cell wall protein (flocculin) involved in flocculation; binds mannose chains on the surface of other cells, confers floc-forming ability that is chymotrypsin resistant but heat labile; important for co-flocculation with other yeasts, mediating interaction with specific species; FLO5 has a paralog, FLO1, that arose from a segmental duplication	1075	111927	YHR211W	chr08	523722	.	G	C	86	.	DP=10;VDB=0.0019584;SGB=-0.662043;RPB=1;MQB=1;BQB=1;MQ0F=0;AC=1;AN=1;DP4=1,0,9,0;MQ=29;ANN=C|missense_variant|MODERATE|YHR211W|YHR211W|transcript|TRANSCRIPT_YHR211W|protein_coding|1/1|c.1778G>C|p.Arg593Thr|1778/3345|1778/3345|593/1114||	GT:PL:AD	1:113,0:1,9
S000001254	YHR211W	FLO5	FLOcculation	flocculin FLO5	Lectin-like cell wall protein (flocculin) involved in flocculation	Lectin-like cell wall protein (flocculin) involved in flocculation; binds mannose chains on the surface of other cells, confers floc-forming ability that is chymotrypsin resistant but heat labile; important for co-flocculation with other yeasts, mediating interaction with specific species; FLO5 has a paralog, FLO1, that arose from a segmental duplication	1075	111927	YHR211W	chr08	523723	.	A	C	100	.	DP=10;VDB=0.00186908;SGB=-0.662043;MQ0F=0;AC=1;AN=1;DP4=0,0,9,0;MQ=29;ANN=C|missense_variant|MODERATE|YHR211W|YHR211W|transcript|TRANSCRIPT_YHR211W|protein_coding|1/1|c.1779A>C|p.Arg593Ser|1779/3345|1779/3345|593/1114||	GT:PL:AD	1:130,0:0,9
S000003931	YLL008W	DRS1	Deficiency of Ribosomal Subunits	putative ATP-dependent RNA helicase	Nucleolar DEAD-box protein required for ribosome assembly and function	Nucleolar DEAD-box protein required for ribosome assembly and function; including synthesis of 60S ribosomal subunits; constituent of 66S pre-ribosomal particles	752	84831.1	YLL008W	chr12	132945	.	AGAAGAGGAAGAGGAAGAGGAAGAGGA	AGAAGAGGAAGAGGAAGAGGAAGAGGAAGAGGA	225	.	INDEL;IDV=44;IMF=0.411215;DP=107;VDB=0.474956;SGB=-0.693147;MQSB=0.250276;MQ0F=0;AC=1;AN=1;DP4=0,0,48,26;MQ=51;ANN=AGAAGAGGAAGAGGAAGAGGAAGAGGAAGAGGA|disruptive_inframe_insertion|MODERATE|YLL008W|YLL008W|transcript|TRANSCRIPT_YLL008W|protein_coding|1/1|c.546_551dupAGAGGA|p.Glu183_Glu184dup|552/2262|552/2262|184/753||	GT:PL:AD	1:255,0:0,74
S000003931	YLL008W	DRS1	Deficiency of Ribosomal Subunits	putative ATP-dependent RNA helicase	Nucleolar DEAD-box protein required for ribosome assembly and function	Nucleolar DEAD-box protein required for ribosome assembly and function; including synthesis of 60S ribosomal subunits; constituent of 66S pre-ribosomal particles	752	84831.1	YLL008W	chr12	132968	.	AGGA	AGGAAGGGGA	196	.	INDEL;IDV=1;IMF=0.00980392;DP=101;VDB=0.898535;SGB=-0.693147;MQSB=0.713418;MQ0F=0;AC=1;AN=1;DP4=4,5,37,17;MQ=54;ANN=AGGAAGGGGA|disruptive_inframe_insertion|MODERATE|YLL008W|YLL008W|transcript|TRANSCRIPT_YLL008W|protein_coding|1/1|c.551_552insAGGGGA|p.Glu184_Glu185insGlyGlu|552/2262|552/2262|184/753||	GT:PL:AD	1:255,32:9,54
S000001800	YKR092C	SRP40	Serine Rich Protein	None	Nucleolar serine-rich protein	Nucleolar serine-rich protein; role in preribosome assembly or transport; may function as a chaperone of small nucleolar ribonucleoprotein particles (snoRNPs); immunologically and structurally to rat Nopp140	406	40971.7	YKR092C	chr11	622594	.	AAGAAG	AAGAAGCAGAAG	7.42886	.	INDEL;IDV=2;IMF=0.0111732;DP=179;VDB=1;SGB=-0.693147;MQSB=0.360519;MQ0F=0;AC=1;AN=1;DP4=34,28,57,39;MQ=32;ANN=AAGAAGCAGAAG|conservative_inframe_insertion|MODERATE|YKR092C|YKR092C|transcript|TRANSCRIPT_YKR092C|protein_coding|1/1|c.232_233insCTTCTG|p.Ser78_Ser79insSerAla|232/1221|232/1221|78/406||	GT:PL:AD	1:255,221:62,96
S000001800	YKR092C	SRP40	Serine Rich Protein	None	Nucleolar serine-rich protein	Nucleolar serine-rich protein; role in preribosome assembly or transport; may function as a chaperone of small nucleolar ribonucleoprotein particles (snoRNPs); immunologically and structurally to rat Nopp140	406	40971.7	YKR092C	chr11	622598	.	AGAAGA	AGAAGAGGAAGA	39.649	.	INDEL;IDV=1;IMF=0.00552486;DP=181;VDB=0.999998;SGB=-0.693147;MQSB=0.298558;MQ0F=0;AC=1;AN=1;DP4=36,16,55,39;MQ=32;ANN=AGAAGAGGAAGA|conservative_inframe_insertion|MODERATE|YKR092C|YKR092C|transcript|TRANSCRIPT_YKR092C|protein_coding|1/1|c.228_229insTCTTCC|p.Ser75_Ser76dup|228/1221|228/1221|76/406||	GT:PL:AD	1:255,188:52,94
S000001800	YKR092C	SRP40	Serine Rich Protein	None	Nucleolar serine-rich protein	Nucleolar serine-rich protein; role in preribosome assembly or transport; may function as a chaperone of small nucleolar ribonucleoprotein particles (snoRNPs); immunologically and structurally to rat Nopp140	406	40971.7	YKR092C	chr11	622726	.	AGGGGG	AGG	76	.	INDEL;IDV=1;IMF=0.00684932;DP=146;VDB=0.0131155;SGB=-0.693147;MQSB=0.964184;MQ0F=0;AC=1;AN=1;DP4=7,8,47,56;MQ=30;ANN=AGG|conservative_inframe_deletion|MODERATE|YKR092C|YKR092C|transcript|TRANSCRIPT_YKR092C|protein_coding|1/1|c.101_103delCCC|p.Pro35del|103/1221|101/1221|34/406||	GT:PL:AD	1:103,0:15,103
S000000556	YCL051W	LRE1	Laminarase REsistance	None	Protein involved in control of cell wall structure and stress response	Protein involved in control of cell wall structure and stress response; direct inhibitor of the nuclear Dbf2 related (NDR) kinase Cbk1p-Mob2p; overproduction confers resistance to cell-wall degrading enzymes; exhibits genetic interactions with genes involved in the cell wall integrity pathway; LRE1 has a paralog, HLR1, that arose from the whole genome duplication	583	64795.9	YCL051W	chr03	36234	.	T	G	225	.	DP=241;VDB=0.338886;SGB=-0.693147;MQSB=0.98731;MQ0F=0;AC=1;AN=1;DP4=0,0,128,93;MQ=56;ANN=G|missense_variant|MODERATE|YCL051W|YCL051W|transcript|TRANSCRIPT_YCL051W|protein_coding|1/1|c.366T>G|p.Ser122Arg|366/1752|366/1752|122/583||	GT:PL:AD	1:255,0:0,220
S000005022	YNL078W	NIS1	Neck protein Interacting with Septins	JIP1	Protein localized in the bud neck at G2/M phase	Protein localized in the bud neck at G2/M phase; physically interacts with septins; possibly involved in a mitotic signaling network	407	45928.3	YNL078W	chr14	504342	.	TTCGAACACAAA	TTCGAACACAAAGTCGAACACAAA	133	.	INDEL;IDV=1;IMF=0.00952381;DP=105;VDB=0.00502712;SGB=-0.693147;MQSB=0.973424;MQ0F=0;AC=1;AN=1;DP4=6,10,30,34;MQ=32;ANN=TTCGAACACAAAGTCGAACACAAA|disruptive_inframe_insertion|MODERATE|YNL078W|YNL078W|transcript|TRANSCRIPT_YNL078W|protein_coding|1/1|c.173_174insGTCGAACACAAA|p.Thr57_Asn58insLysSerAsnThr|174/1224|174/1224|58/407||	GT:PL:AD	1:240,80:16,64
S000005022	YNL078W	NIS1	Neck protein Interacting with Septins	JIP1	Protein localized in the bud neck at G2/M phase	Protein localized in the bud neck at G2/M phase; physically interacts with septins; possibly involved in a mitotic signaling network	407	45928.3	YNL078W	chr14	504355	.	TC	TCGAACACAAATCC	228	.	INDEL;IDV=2;IMF=0.0210526;DP=95;VDB=0.00131865;SGB=-0.693147;MQSB=0.925509;MQ0F=0;AC=1;AN=1;DP4=3,6,30,34;MQ=33;ANN=TCGAACACAAATCC|disruptive_inframe_insertion|MODERATE|YNL078W|YNL078W|transcript|TRANSCRIPT_YNL078W|protein_coding|1/1|c.176_177insGAACACAAATCC|p.Ser59_Asn60insAsnThrAsnPro|177/1224|177/1224|59/407||	GT:PL:AD	1:255,0:9,64
S000003936	YLL013C	PUF3	PUmilio-homology domain Family	mRNA-binding protein PUF3	Protein of the mitochondrial outer surface	Protein of the mitochondrial outer surface; links the Arp2/3 complex with the mitochore during anterograde mitochondrial movement; also binds to and promotes degradation of mRNAs for select nuclear-encoded mitochondrial proteins	879	98064.9	YLL013C	chr12	124173	.	TGT	TGTGGT	139	.	INDEL;IDV=1;IMF=0.00819672;DP=122;VDB=0.844409;SGB=-0.693147;MQSB=0.736603;MQ0F=0;AC=1;AN=1;DP4=9,6,43,33;MQ=58;ANN=TGTGGT|conservative_inframe_insertion|MODERATE|YLL013C|YLL013C|transcript|TRANSCRIPT_YLL013C|protein_coding|1/1|c.1223_1224insACC|p.Gln408_Gln409insPro|1223/2640|1223/2640|408/879||WARNING_TRANSCRIPT_NO_START_CODON	GT:PL:AD	1:217,51:15,76
S000003936	YLL013C	PUF3	PUmilio-homology domain Family	mRNA-binding protein PUF3	Protein of the mitochondrial outer surface	Protein of the mitochondrial outer surface; links the Arp2/3 complex with the mitochore during anterograde mitochondrial movement; also binds to and promotes degradation of mRNAs for select nuclear-encoded mitochondrial proteins	879	98064.9	YLL013C	chr12	124175	.	TTG	TTGGTG	173	.	INDEL;IDV=1;IMF=0.00854701;DP=117;VDB=0.792104;SGB=-0.693147;MQSB=0.888091;MQ0F=0;AC=1;AN=1;DP4=8,6,42,34;MQ=58;ANN=TTGGTG|conservative_inframe_insertion|MODERATE|YLL013C|YLL013C|transcript|TRANSCRIPT_YLL013C|protein_coding|1/1|c.1221_1222insCAC|p.Gln407_Gln408insHis|1221/2640|1221/2640|407/879||WARNING_TRANSCRIPT_NO_START_CODON	GT:PL:AD	1:243,43:14,76
S000003936	YLL013C	PUF3	PUmilio-homology domain Family	mRNA-binding protein PUF3	Protein of the mitochondrial outer surface	Protein of the mitochondrial outer surface; links the Arp2/3 complex with the mitochore during anterograde mitochondrial movement; also binds to and promotes degradation of mRNAs for select nuclear-encoded mitochondrial proteins	879	98064.9	YLL013C	chr12	124176	.	TGT	TGTGGT	171	.	INDEL;IDV=1;IMF=0.00847458;DP=118;VDB=0.831923;SGB=-0.693147;MQSB=0.891286;MQ0F=0;AC=1;AN=1;DP4=8,6,43,34;MQ=58;ANN=TGTGGT|conservative_inframe_insertion|MODERATE|YLL013C|YLL013C|transcript|TRANSCRIPT_YLL013C|protein_coding|1/1|c.1220_1221insACC|p.Gln407_Gln408insPro|1220/2640|1220/2640|407/879||WARNING_TRANSCRIPT_NO_START_CODON	GT:PL:AD	1:240,42:14,77
S000003936	YLL013C	PUF3	PUmilio-homology domain Family	mRNA-binding protein PUF3	Protein of the mitochondrial outer surface	Protein of the mitochondrial outer surface; links the Arp2/3 complex with the mitochore during anterograde mitochondrial movement; also binds to and promotes degradation of mRNAs for select nuclear-encoded mitochondrial proteins	879	98064.9	YLL013C	chr12	124188	.	TG	TGTGG	198	.	INDEL;IDV=1;IMF=0.00840336;DP=119;VDB=0.39076;SGB=-0.693147;MQSB=0.987671;MQ0F=0;AC=1;AN=1;DP4=2,9,45,34;MQ=58;ANN=TGTGG|conservative_inframe_insertion|MODERATE|YLL013C|YLL013C|transcript|TRANSCRIPT_YLL013C|protein_coding|1/1|c.1209_1210insCCA|p.Gln403_Gln404insPro|1209/2640|1209/2640|403/879||WARNING_TRANSCRIPT_NO_START_CODON	GT:PL:AD	1:225,0:11,79
S000001431	YIL169C	CSS1	Condition Specific Secretion	HPF1'	Protein of unknown function, secreted when constitutively expressed	Protein of unknown function, secreted when constitutively expressed; SWAT-GFP, seamless-GFP and mCherry fusion proteins localize to the cell periphery, SWAT-GFP fusion also localizes to the extracellular region, and mCherry fusion also localizes to the vacuole; S/T rich and highly similar to YOL155C, a putative glucan alpha-1,4-glucosidase; transcript is induced in both high and low pH environmen…	995	99694.3	YIL169C	chr09	27183	.	C	A	17.8874	.	DP=230;VDB=0.00282666;SGB=-0.693147;RPB=6.19017e-12;MQB=0.298422;MQSB=0.0404984;BQB=0.92172;MQ0F=0;AC=1;AN=1;DP4=9,39,103,66;MQ=32;ANN=A|missense_variant|MODERATE|YIL169C|YIL169C|transcript|TRANSCRIPT_YIL169C|protein_coding|1/1|c.371G>T|p.Ser124Ile|371/3020|371/3020|124/1005||WARNING_TRANSCRIPT_MULTIPLE_STOP_CODONS	GT:PL:AD	1:255,210:48,168
S000001431	YIL169C	CSS1	Condition Specific Secretion	HPF1'	Protein of unknown function, secreted when constitutively expressed	Protein of unknown function, secreted when constitutively expressed; SWAT-GFP, seamless-GFP and mCherry fusion proteins localize to the cell periphery, SWAT-GFP fusion also localizes to the extracellular region, and mCherry fusion also localizes to the vacuole; S/T rich and highly similar to YOL155C, a putative glucan alpha-1,4-glucosidase; transcript is induced in both high and low pH environmen…	995	99694.3	YIL169C	chr09	27184	.	T	A	78	.	DP=227;VDB=0.00359298;SGB=-0.693147;RPB=1.10562e-12;MQB=0.0858765;MQSB=0.0245222;BQB=0.930967;MQ0F=0;AC=1;AN=1;DP4=5,37,105,69;MQ=32;ANN=A|missense_variant|MODERATE|YIL169C|YIL169C|transcript|TRANSCRIPT_YIL169C|protein_coding|1/1|c.370A>T|p.Ser124Cys|370/3020|370/3020|124/1005||WARNING_TRANSCRIPT_MULTIPLE_STOP_CODONS	GT:PL:AD	1:255,150:42,173
S000002557	YDR150W	NUM1	NUclear Migration	PAC12	Protein required for nuclear migration	Protein required for nuclear migration; component of the mitochondria-ER-cortex-ancor (MECA); required for the association of mitochondria with the cell cortex and for accurate distribution of mitochondrial network; interacts with Mdm36p to link the ER and mitochondria at the cortex; localizes to the mother cell cortex and the bud tip; may mediate interactions of dynein and cytoplasmic microtubul…	2748	312912	YDR150W	chr04	761864	.	T	C	122	.	DP=19;VDB=0.129778;SGB=-0.691153;MQ0F=0;AC=1;AN=1;DP4=0,0,0,18;MQ=28;ANN=C|missense_variant|MODERATE|YDR150W|YDR150W|transcript|TRANSCRIPT_YDR150W|protein_coding|1/1|c.2683T>C|p.Ser895Pro|2683/8247|2683/8247|895/2748||	GT:PL:AD	1:152,0:0,18
S000000429	YBR225W	None	None	None	Putative protein of unknown function	Putative protein of unknown function; non-essential gene identified in a screen for mutants affected in mannosylphophorylation of cell wall components	900	101242	YBR225W	chr02	677228	.	TCA	TCACCA	154	.	INDEL;IDV=1;IMF=0.00990099;DP=101;VDB=0.988685;SGB=-0.693147;MQSB=0.63939;MQ0F=0;AC=1;AN=1;DP4=6,9,27,44;MQ=53;ANN=TCACCA|disruptive_inframe_insertion|MODERATE|YBR225W|YBR225W|transcript|TRANSCRIPT_YBR225W|protein_coding|1/1|c.395_396insCCA|p.His132dup|396/2703|396/2703|132/900||	GT:PL:AD	1:255,74:15,71
S000000429	YBR225W	None	None	None	Putative protein of unknown function	Putative protein of unknown function; non-essential gene identified in a screen for mutants affected in mannosylphophorylation of cell wall components	900	101242	YBR225W	chr02	677230	.	ATC	ATCCTC	186	.	INDEL;IDV=1;IMF=0.00980392;DP=102;VDB=0.96994;SGB=-0.693147;MQSB=0.605145;MQ0F=0;AC=1;AN=1;DP4=6,7,26,46;MQ=53;ANN=ATCCTC|disruptive_inframe_insertion|MODERATE|YBR225W|YBR225W|transcript|TRANSCRIPT_YBR225W|protein_coding|1/1|c.397_398insCTC|p.His132_His133insPro|398/2703|398/2703|133/900||	GT:PL:AD	1:255,42:13,72
S000002299	YDL140C	RPO21	RNA POlymerase	B220 SUA8 RPB220 RPB1 DNA-directed RNA polymerase II core subunit RPO21	RNA polymerase II largest subunit B220	RNA polymerase II largest subunit B220; part of central core; phosphorylation of C-terminal heptapeptide repeat domain regulates association with transcription and splicing factors; similar to bacterial beta-prime	1733	191570	YDL140C	chr04	211263	.	G	C	225	.	DP=65;VDB=0.000352621;SGB=-0.693147;MQSB=0.997662;MQ0F=0;AC=1;AN=1;DP4=0,0,37,23;MQ=58;ANN=C|missense_variant|MODERATE|YDL140C|YDL140C|transcript|TRANSCRIPT_YDL140C|protein_coding|1/1|c.982C>G|p.Arg328Gly|982/5202|982/5202|328/1733||	GT:PL:AD	1:255,0:0,60

## Sheet: rpt5 mutant
SGDID	Systematic	Gene	Gene Name	Alias	Short Description	Description	Length	MW	Systematics	CHROM	POS	ID	REF	ALT	QUAL	FILTER	INFO	GT	AD
S000006158	YPL237W	SUI3	SUppressor of Initiator codon	translation initiation factor eIF2 subunit beta	Beta subunit of the translation initiation factor eIF2	Beta subunit of the translation initiation factor eIF2; involved in the identification of the start codon; proposed to be involved in mRNA binding	285	31590.7	YPL237W	chr16	101473	.	T	C,TC	3826	PASS	AF=0,1;AO=7,235;DP=247;FAO=0,242;FDP=242;FR=.;FRO=0;FSAF=0,123;FSAR=0,119;FSRF=0;FSRR=0;FWDB=-0.0133418,-0.0136606;FXX=0.0122444;HRUN=3,0;LEN=1,1;MLLD=172.612,197.187;OALT=C,C;OID=.,.;OMAPALT=C,TC;OPOS=101473,101474;OREF=T,-;QD=63.2397;RBI=0.0143732,0.0179103;REFB=-0.0054971,-0.00838864;REVB=-0.00534661,0.011583;RO=5;SAF=1,124;SAR=6,111;SRF=1;SRR=4;SSEN=0,0;SSEP=0,0;SSSB=-0.0763028,0.0130331;STB=…	GT:GQ:DP:FDP:RO:FRO:AO:FAO:AF:SAR:SAF:SRF:SRR:FSAR:FSAF:FSRF:FSRR	2/2:15:247:242:5:0:7,235:0,242:0,1:6,111:1,124:1:4:0,119:0,123:0:0
S000005535	YOR009W	TIR4	TIp1-Related	None	Cell wall mannoprotein	Cell wall mannoprotein; expressed under anaerobic conditions and required for anaerobic growth; transcription is also induced by cold shock; member of the Srp1p/Tip1p family of serine-alanine-rich proteins	487	47824.2	YOR009W	chr15	346881	.	CA	C,CT	328.993	PASS	AF=1,0;AO=15,11;DP=33;FAO=28,0;FDP=28;FR=.;FRO=0;FSAF=4,0;FSAR=24,0;FSRF=0;FSRR=0;FWDB=0.170757,0.063839;FXX=0;HRUN=1,1;LEN=1,1;MLLD=33.1002,27.0286;OALT=-,T;OID=.,.;OMAPALT=C,CT;OPOS=346882,346882;OREF=A,A;QD=46.999;RBI=0.181763,0.13104;REFB=0,0;REVB=0.0622873,-0.114438;RO=6;SAF=3,0;SAR=12,11;SRF=6;SRR=0;SSEN=0,0;SSEP=0,0;SSSB=-0.445428,-0.848351;STB=0.5,0.5;STBP=1,1;TYPE=del,snp;VARB=0.00698701…	GT:GQ:DP:FDP:RO:FRO:AO:FAO:AF:SAR:SAF:SRF:SRR:FSAR:FSAF:FSRF:FSRR	1/1:4:33:28:6:0:15,11:28,0:1,0:12,11:3,0:6:0:24,0:4,0:0:0
S000003926	YLL003W	SFI1	Suppressor of Fermentation Induced loss of stress resistance	None	Centrin (Cdc31p)-binding protein required for SPB duplication	Centrin (Cdc31p)-binding protein required for SPB duplication; localizes to the half-bridge of the spindle pole body (SPB); required for progression through G(2)-M transition; phosphorylated by Cdc28p-Clb2p and by Cdc5p; dephosphorylated by Cdc14p; has similarity to Xenopus laevis XCAP-C	946	113039	YLL003W	chr12	146697	.	A	G	3291.85	PASS	AF=1;AO=211;DP=212;FAO=213;FDP=213;FR=.;FRO=0;FSAF=107;FSAR=106;FSRF=0;FSRR=0;FWDB=0.0148071;FXX=0.00467268;HRUN=1;LEN=1;MLLD=300.393;OALT=G;OID=.;OMAPALT=G;OPOS=146697;OREF=A;QD=61.8189;RBI=0.0245362;REFB=-0.0546573;REVB=0.0195646;RO=0;SAF=106;SAR=105;SRF=0;SRR=0;SSEN=0;SSEP=0;SSSB=0;STB=0.5;STBP=1;TYPE=snp;VARB=0.00016795;ANN=G|missense_variant|MODERATE|YLL003W|YLL003W|transcript|TRANSCRIPT_YLL…	GT:GQ:DP:FDP:RO:FRO:AO:FAO:AF:SAR:SAF:SRF:SRR:FSAR:FSAF:FSRF:FSRR	1/1:13:212:213:0:0:211:213:1:105:106:0:0:106:107:0:0
S000004109	YLR119W	SRN2	Suppressor of Rna mutations, Number 2	VPL16 ESCRT-I subunit protein SRN2 VPS37 SRN10	Component of the ESCRT-I complex	Component of the ESCRT-I complex; ESCRT-I is involved in ubiquitin-dependent sorting of proteins into the endosome; suppressor of rna1-1 mutation; may be involved in RNA export from nucleus	213	25106	YLR119W	chr12	386480	.	G	GA,GAA,GAAA	2219.24	PASS	AF=0,1,0;AO=10,130,10;DP=162;FAO=0,154,0;FDP=154;FR=.;FRO=0;FSAF=0,88,0;FSAR=0,66,0;FSRF=0;FSRR=0;FWDB=0.0363963,0.0189139,0.0132586;FXX=0.0191071;HRUN=3,3,3;LEN=1,2,3;MLLD=18.5356,31.42,21.1475;OALT=A,AA,AAA;OID=.,.,.;OMAPALT=GA,GAA,GAAA;OPOS=386481,386481,386481;OREF=-,-,-;QD=57.6426;RBI=0.0395643,0.0201845,0.0140514;REFB=0,0,0;REVB=-0.0155126,-0.00704803,-0.00465324;RO=6;SAF=8,69,8;SAR=2,61,2;…	GT:GQ:DP:FDP:RO:FRO:AO:FAO:AF:SAR:SAF:SRF:SRR:FSAR:FSAF:FSRF:FSRR	2/2:13:162:154:6:0:10,130,10:0,154,0:0,1,0:2,61,2:8,69,8:6:0:0,66,0:0,88,0:0:0
S000005041	YNL097C	PHO23	PHOsphate metabolism	None	Component of the Rpd3L histone deacetylase complex	Component of the Rpd3L histone deacetylase complex; involved in transcriptional regulation of PHO5; affects termination of snoRNAs and cryptic unstable transcripts (CUTs); C-terminus shares significant sequence identity with the human candidate tumor suppressor p33-ING1 and its isoform ING3	330	37026	YNL097C	chr14	466722	.	C	T	2291.62	PASS	AF=1;AO=154;DP=154;FAO=150;FDP=150;FR=.;FRO=0;FSAF=74;FSAR=76;FSRF=0;FSRR=0;FWDB=0.00814945;FXX=0.0259723;HRUN=5;LEN=1;MLLD=297.656;OALT=T;OID=.;OMAPALT=T;OPOS=466722;OREF=C;QD=61.1099;RBI=0.014903;REFB=0;REVB=0.0124774;RO=0;SAF=77;SAR=77;SRF=0;SRR=0;SSEN=0;SSEP=0;SSSB=0;STB=0.5;STBP=1;TYPE=snp;VARB=8.94731e-06;ANN=T|missense_variant|MODERATE|YNL097C|YNL097C|transcript|TRANSCRIPT_YNL097C|protein_…	GT:GQ:DP:FDP:RO:FRO:AO:FAO:AF:SAR:SAF:SRF:SRR:FSAR:FSAF:FSRF:FSRR	1/1:13:154:150:0:0:154:150:1:77:77:0:0:76:74:0:0
S000005900	YOR373W	NUD1	None	None	Component of the spindle pole body outer plaque	Component of the spindle pole body outer plaque; acts through the mitotic exit network to specify asymmetric spindle pole body inheritance	851	94100.1	YOR373W	chr15	1036982	.	ACA	AAA,AA,A,ACAA	1125.66	PASS	AF=0,1,0,0;AO=2,67,7,6;DP=84;FAO=0,75,0,0;FDP=75;FR=.;FRO=0;FSAF=0,29,0,0;FSAR=0,46,0,0;FSRF=0;FSRR=0;FWDB=0.040166,0.0418942,0.0396708,0.302627;FXX=0.0384566;HRUN=1,1,1,3;LEN=1,1,2,1;MLLD=148.149,161.507,147.583,14.4501;OALT=A,-,-,A;OID=.,.,.,.;OMAPALT=AAA,AA,A,ACAA;OPOS=1036983,1036983,1036983,1036984;OREF=C,C,CA,-;QD=60.0351;RBI=0.0655824,0.0728329,0.0723001,0.339136;REFB=0,0,0,0;REVB=0.051843…	GT:GQ:DP:FDP:RO:FRO:AO:FAO:AF:SAR:SAF:SRF:SRR:FSAR:FSAF:FSRF:FSRR	2/2:6:84:75:0:0:2,67,7,6:0,75,0,0:0,1,0,0:1,44,2,4:1,23,5,2:0:0:0,46,0,0:0,29,0,0:0:0
S000002815	YDR407C	TRS120	TRapp Subunit	None	Component of transport protein particle (TRAPP) complex II	Component of transport protein particle (TRAPP) complex II; TRAPPII is a multimeric guanine nucleotide-exchange factor for the GTPase Ypt1p, regulating intra-Golgi and endosome-Golgi traffic	1289	147664	YDR407C	chr04	1290296	.	T	TC	2288.45	PASS	AF=1;AO=150;DP=151;FAO=150;FDP=150;FR=.;FRO=0;FSAF=81;FSAR=69;FSRF=0;FSRR=0;FWDB=-0.00233642;FXX=0.00662208;HRUN=0;LEN=1;MLLD=222.416;OALT=C;OID=.;OMAPALT=TC;OPOS=1290297;OREF=-;QD=61.0252;RBI=0.00272217;REFB=0;REVB=0.00139691;RO=0;SAF=81;SAR=69;SRF=0;SRR=0;SSEN=0;SSEP=0;SSSB=0;STB=0.5;STBP=1;TYPE=ins;VARB=9.61041e-07;ANN=TC|frameshift_variant|HIGH|YDR407C|YDR407C|transcript|TRANSCRIPT_YDR407C|pr…	GT:GQ:DP:FDP:RO:FRO:AO:FAO:AF:SAR:SAF:SRF:SRR:FSAR:FSAF:FSRF:FSRR	1/1:13:151:150:0:0:150:150:1:69:81:0:0:69:81:0:0
S000028527	YPL189C-A	COA2	Cytochrome Oxidase Assembly	None	Cytochrome oxidase assembly factor	Cytochrome oxidase assembly factor; null mutation results in respiratory deficiency with specific loss of cytochrome oxidase activity; functions downstream of assembly factors Mss51p and Coa1p and interacts with assembly factor Shy1p	68	7536.9	YPL189C-A	chr16	188775	.	G	A	3103.4	PASS	AF=1;AO=176;DP=202;FAO=202;FDP=202;FR=.,HEALED;FRO=0;FSAF=108;FSAR=94;FSRF=0;FSRR=0;FWDB=0.0406026;FXX=0;HRUN=1;LEN=1;MLLD=289.13;OALT=A;OID=.;OMAPALT=A;OPOS=188775;OREF=G;QD=61.4534;RBI=0.0602186;REFB=0;REVB=0.0444714;RO=0;SAF=89;SAR=87;SRF=0;SRR=0;SSEN=0;SSEP=0;SSSB=0;STB=0.5;STBP=1;TYPE=snp;VARB=0.000125771;ANN=A|missense_variant|MODERATE|YPL189C-A|YPL189C-A|transcript|TRANSCRIPT_YPL189C-A|pro…	GT:GQ:DP:FDP:RO:FRO:AO:FAO:AF:SAR:SAF:SRF:SRR:FSAR:FSAF:FSRF:FSRR	1/1:17:202:202:0:0:176:202:1:87:89:0:0:94:108:0:0
S000006005	YPL084W	BRO1	BCK1-like Resistance to Osmotic shock	LPF2 ASI6 NPI3 VPS31	Cytoplasmic class E vacuolar protein sorting (VPS) factor	Cytoplasmic class E vacuolar protein sorting (VPS) factor; coordinates deubiquitination in the multivesicular body (MVB) pathway by recruiting Doa4p to endosomes	844	97253.6	YPL084W	chr16	395425	.	G	A	2409.02	PASS	AF=1;AO=150;DP=150;FAO=150;FDP=150;FR=.;FRO=0;FSAF=84;FSAR=66;FSRF=0;FSRR=0;FWDB=0.00604268;FXX=0;HRUN=1;LEN=1;MLLD=95.6696;OALT=A;OID=.;OMAPALT=A;OPOS=395425;OREF=G;QD=64.2404;RBI=0.0128998;REFB=0;REVB=0.011397;RO=0;SAF=84;SAR=66;SRF=0;SRR=0;SSEN=0;SSEP=0;SSSB=0;STB=0.5;STBP=1;TYPE=snp;VARB=4.53445e-05;ANN=A|missense_variant|MODERATE|YPL084W|YPL084W|transcript|TRANSCRIPT_YPL084W|protein_coding|1…	GT:GQ:DP:FDP:RO:FRO:AO:FAO:AF:SAR:SAF:SRF:SRR:FSAR:FSAF:FSRF:FSRR	1/1:13:150:150:0:0:150:150:1:66:84:0:0:66:84:0:0
S000001465	YIR026C	YVH1	Yeast vaccinia virus VH1 Homolog	tyrosine protein phosphatase YVH1	Dual specificity protein phosphatase	Dual specificity protein phosphatase; regulates growth, sporulation, and glycogen accumulation in a cAMP-dependent protein kinase cascade dependent manner; mutants are defective in 60S ribosome assembly; positively regulates pre-autophagosomal structure (PAS) formation upon nitrogen starvation or rapamycin treatment	364	41188.6	YIR026C	chr09	411706	.	CTTTTTTTTAG	CTTTTTTAG,CTTTTTTTAG,CTTTTTTTAGT	602.425	PASS	AF=0,1,0;AO=8,62,8;DP=126;FAO=0,121,0;FDP=121;FR=.;FRO=0;FSAF=0,66,0;FSAR=0,55,0;FSRF=0;FSRR=0;FWDB=0.0831038,0.16474,-0.0347517;FXX=0.0241916;HRUN=8,8,8;LEN=2,1,3;MLLD=10.4209,8.11905,23.5602;OALT=-,-,AGT;OID=.,.,.;OMAPALT=CTTTTTTAG,CTTTTTTTAG,CTTTTTTTAGT;OPOS=411707,411707,411714;OREF=TT,T,TAG;QD=19.9149;RBI=0.0958895,0.186185,0.0468927;REFB=0.0317251,0.0501081,0.0365169;REVB=0.0478387,0.086751…	GT:GQ:DP:FDP:RO:FRO:AO:FAO:AF:SAR:SAF:SRF:SRR:FSAR:FSAF:FSRF:FSRR	0/2:7:126:121:37:0:8,62,8:0,121,0:0,1,0:4,35,0:4,27,8:24:13:0,55,0:0,66,0:0:0
S000002317	YDL158C	None	None	None	Dubious open reading frame	Dubious open reading frame; unlikely to encode a functional protein, based on available experimental and comparative sequence data	102	11990.5	YDL158C	chr04	175777	.	A	G	2789.83	PASS	AF=1;AO=178;DP=178;FAO=178;FDP=178;FR=.;FRO=0;FSAF=91;FSAR=87;FSRF=0;FSRR=0;FWDB=0.0375046;FXX=0;HRUN=4;LEN=1;MLLD=143.846;OALT=G;OID=.;OMAPALT=G;OPOS=175777;OREF=A;QD=62.6929;RBI=0.0402664;REFB=0;REVB=0.0146555;RO=0;SAF=91;SAR=87;SRF=0;SRR=0;SSEN=0;SSEP=0;SSSB=0;STB=0.5;STBP=1;TYPE=snp;VARB=3.22345e-05;ANN=G|missense_variant|MODERATE|YDL158C|YDL158C|transcript|TRANSCRIPT_YDL158C|protein_coding|1…	GT:GQ:DP:FDP:RO:FRO:AO:FAO:AF:SAR:SAF:SRF:SRR:FSAR:FSAF:FSRF:FSRR	1/1:15:178:178:0:0:178:178:1:87:91:0:0:87:91:0:0
S000001260	YHR217C	None	None	None	Dubious open reading frame	Dubious open reading frame; unlikely to encode a functional protein, based on available experimental and comparative sequence data; located in the telomeric region TEL08R	153	17082.8	YHR217C	chr08	555113	.	TG	T	989.27	PASS	AF=1;AO=70;DP=72;FAO=74;FDP=74;FR=.;FRO=0;FSAF=33;FSAR=41;FSRF=0;FSRR=0;FWDB=0.0046759;FXX=0.0133316;HRUN=2;LEN=1;MLLD=22.5499;OALT=-;OID=.;OMAPALT=T;OPOS=555114;OREF=G;QD=53.474;RBI=0.0288393;REFB=0;REVB=-0.0284577;RO=1;SAF=32;SAR=38;SRF=0;SRR=1;SSEN=0;SSEP=0;SSSB=0.0122803;STB=0.5;STBP=1;TYPE=del;VARB=0.00058526;ANN=T|frameshift_variant|HIGH|YHR217C|YHR217C|transcript|TRANSCRIPT_YHR217C|protein…	GT:GQ:DP:FDP:RO:FRO:AO:FAO:AF:SAR:SAF:SRF:SRR:FSAR:FSAF:FSRF:FSRR	1/1:5:72:74:1:0:70:74:1:38:32:0:1:41:33:0:0
S000001748	YKR040C	None	None	None	Dubious open reading frame	Dubious open reading frame; unlikely to encode a functional protein, based on available experimental and comparative sequence data; partially overlaps the uncharacterized ORF YKR041W	167	19240.3	YKR040C	chr11	525621	.	T	C	689.934	PASS	AF=1;AO=38;DP=47;FAO=46;FDP=46;FR=.,HEALED;FRO=0;FSAF=19;FSAR=27;FSRF=0;FSRR=0;FWDB=0.129166;FXX=0.0212721;HRUN=25;LEN=1;MLLD=27.8535;OALT=C;OID=.;OMAPALT=C;OPOS=525621;OREF=T;QD=59.9943;RBI=0.154153;REFB=0;REVB=-0.0841393;RO=7;SAF=11;SAR=27;SRF=7;SRR=0;SSEN=0;SSEP=0;SSSB=-0.223843;STB=0.5;STBP=1;TYPE=snp;VARB=-0.00659873;ANN=C|missense_variant|MODERATE|YKR040C|YKR040C|transcript|TRANSCRIPT_YKR04…	GT:GQ:DP:FDP:RO:FRO:AO:FAO:AF:SAR:SAF:SRF:SRR:FSAR:FSAF:FSRF:FSRR	1/1:3:47:46:7:0:38:46:1:27:11:7:0:27:19:0:0
S000007240	YGR122C-A	None	None	None	Dubious open reading frame	Dubious open reading frame; unlikely to encode a functional protein, based on available experimental and comparative sequence data; similar to YLR334C and YOL106W	42	4633.3	YGR122C-A	chr07	744246	.	A	T	447.022	PASS	AF=1;AO=31;DP=31;FAO=31;FDP=31;FR=.;FRO=0;FSAF=14;FSAR=17;FSRF=0;FSRR=0;FWDB=0.0337147;FXX=0;HRUN=1;LEN=1;MLLD=86.1256;OALT=T;OID=.;OMAPALT=T;OPOS=744246;OREF=A;QD=57.6803;RBI=0.0394727;REFB=0;REVB=0.0205283;RO=0;SAF=14;SAR=17;SRF=0;SRR=0;SSEN=0;SSEP=0;SSSB=0;STB=0.5;STBP=1;TYPE=snp;VARB=0.000898757;ANN=T|stop_gained|HIGH|YGR122C-A|YGR122C-A|transcript|TRANSCRIPT_YGR122C-A|protein_coding|1/1|c.21…	GT:GQ:DP:FDP:RO:FRO:AO:FAO:AF:SAR:SAF:SRF:SRR:FSAR:FSAF:FSRF:FSRR	1/1:4:31:31:0:0:31:31:1:17:14:0:0:17:14:0:0
S000007240	YGR122C-A	None	None	None	Dubious open reading frame	Dubious open reading frame; unlikely to encode a functional protein, based on available experimental and comparative sequence data; similar to YLR334C and YOL106W	42	4633.3	YGR122C-A	chr07	744250	.	A	G	483.864	PASS	AF=1;AO=32;DP=32;FAO=33;FDP=33;FR=.;FRO=0;FSAF=15;FSAR=18;FSRF=0;FSRR=0;FWDB=0.00461476;FXX=0;HRUN=1;LEN=1;MLLD=306.836;OALT=G;OID=.;OMAPALT=G;OPOS=744250;OREF=A;QD=58.6502;RBI=0.0162634;REFB=0;REVB=0.0155949;RO=0;SAF=14;SAR=18;SRF=0;SRR=0;SSEN=0;SSEP=0;SSSB=0;STB=0.5;STBP=1;TYPE=snp;VARB=4.09362e-05;ANN=G|missense_variant|MODERATE|YGR122C-A|YGR122C-A|transcript|TRANSCRIPT_YGR122C-A|protein_codin…	GT:GQ:DP:FDP:RO:FRO:AO:FAO:AF:SAR:SAF:SRF:SRR:FSAR:FSAF:FSRF:FSRR	1/1:4:32:33:0:0:32:33:1:18:14:0:0:18:15:0:0
S000001120	YHR078W	None	None	None	High osmolarity-regulated gene of unknown function	High osmolarity-regulated gene of unknown function	552	63331.2	YHR078W	chr08	252792	.	G	A	3140.3	PASS	AF=1;AO=197;DP=199;FAO=198;FDP=198;FR=.;FRO=0;FSAF=107;FSAR=91;FSRF=0;FSRR=0;FWDB=-0.000563827;FXX=0.0099995;HRUN=1;LEN=1;MLLD=252.731;OALT=A;OID=.;OMAPALT=A;OPOS=252792;OREF=G;QD=63.4405;RBI=0.00761638;REFB=-0.0623493;REVB=0.00759549;RO=2;SAF=106;SAR=91;SRF=2;SRR=0;SSEN=0;SSEP=0;SSSB=-0.0089005;STB=0.5;STBP=1;TYPE=snp;VARB=3.55469e-05;ANN=A|missense_variant|MODERATE|YHR078W|YHR078W|transcript|TR…	GT:GQ:DP:FDP:RO:FRO:AO:FAO:AF:SAR:SAF:SRF:SRR:FSAR:FSAF:FSRF:FSRR	1/1:12:199:198:2:0:197:198:1:91:106:2:0:91:107:0:0
S000000922	YER120W	SCS2	Suppressor of Choline Sensitivity	phosphatidylinositol-binding protein SCS2	Integral ER membrane protein, regulates phospholipid metabolism	Integral ER membrane protein, regulates phospholipid metabolism; one of 6 proteins (Ist2p, Scs2p, Scs22p, Tcb1p, Tcb2p, Tcb3p) that connect ER to plasma membrane (PM) and regulate PI4P levels by controlling access of Sac1p phosphatase to substrate PI4P in the PM; interacts with FFAT motifs in Opi1p, Swh1p, Osh2p, and Osh3p; involved in telomeric silencing; VAP homolog; SCS2 has a paralog, SCS22, …	244	26915.7	YER120W	chr05	401702	.	G	GA	3166.77	PASS	AF=1;AO=228;DP=256;FAO=240;FDP=240;FR=.;FRO=0;FSAF=125;FSAR=115;FSRF=0;FSRR=0;FWDB=0.163739;FXX=0.00414921;HRUN=3;LEN=1;MLLD=18.4194;OALT=A;OID=.;OMAPALT=GA;OPOS=401703;OREF=-;QD=52.7795;RBI=0.165575;REFB=0;REVB=-0.0245905;RO=25;SAF=119;SAR=109;SRF=18;SRR=7;SSEN=0;SSEP=0;SSSB=-0.0372794;STB=0.5;STBP=1;TYPE=ins;VARB=0.00173414;ANN=GA|frameshift_variant|HIGH|YER120W|YER120W|transcript|TRANSCRIPT_YE…	GT:GQ:DP:FDP:RO:FRO:AO:FAO:AF:SAR:SAF:SRF:SRR:FSAR:FSAF:FSRF:FSRR	1/1:18:256:240:25:0:228:240:1:109:119:18:7:115:125:0:0
S000001796	YKR088C	TVP38	Tlg2-Vesicle Protein	None	Integral membrane protein	Integral membrane protein; localized to late Golgi vesicles along with the v-SNARE Tlg2p; required for asymmetric localization of Kar9p during mitosis; GFP-fusion protein localizes to the cytoplasm in a punctate pattern	337	38307.7	YKR088C	chr11	614053	.	C	T	3191.62	PASS	AF=1;AO=199;DP=199;FAO=199;FDP=199;FR=.;FRO=0;FSAF=96;FSAR=103;FSRF=0;FSRR=0;FWDB=0.0388432;FXX=0;HRUN=1;LEN=1;MLLD=143.901;OALT=T;OID=.;OMAPALT=T;OPOS=614053;OREF=C;QD=64.1533;RBI=0.0413673;REFB=0;REVB=0.0142288;RO=0;SAF=96;SAR=103;SRF=0;SRR=0;SSEN=0;SSEP=0;SSSB=0;STB=0.5;STBP=1;TYPE=snp;VARB=8.78758e-05;ANN=T|missense_variant|MODERATE|YKR088C|YKR088C|transcript|TRANSCRIPT_YKR088C|protein_coding…	GT:GQ:DP:FDP:RO:FRO:AO:FAO:AF:SAR:SAF:SRF:SRR:FSAR:FSAF:FSRF:FSRR	1/1:17:199:199:0:0:199:199:1:103:96:0:0:103:96:0:0
S000006046	YPL125W	KAP120	KAryoPherin	LPH2	Karyopherin responsible for the nuclear import of Rpf1p	Karyopherin responsible for the nuclear import of Rpf1p; Rpf1p is a ribosome maturation factor	1032	119592	YPL125W	chr16	313743	.	G	GA	2514.95	PASS	AF=1;AO=166;DP=176;FAO=171;FDP=171;FR=.;FRO=0;FSAF=77;FSAR=94;FSRF=0;FSRR=0;FWDB=0.117898;FXX=0.00581362;HRUN=1;LEN=1;MLLD=25.3965;OALT=A;OID=.;OMAPALT=GA;OPOS=313744;OREF=-;QD=58.8292;RBI=0.120165;REFB=0;REVB=0.0232294;RO=8;SAF=74;SAR=92;SRF=4;SRR=4;SSEN=0;SSEP=0;SSSB=-0.00479008;STB=0.5;STBP=1;TYPE=ins;VARB=0.00129627;ANN=GA|frameshift_variant|HIGH|YPL125W|YPL125W|transcript|TRANSCRIPT_YPL125W|…	GT:GQ:DP:FDP:RO:FRO:AO:FAO:AF:SAR:SAF:SRF:SRR:FSAR:FSAF:FSRF:FSRR	1/1:14:176:171:8:0:166:171:1:92:74:4:4:94:77:0:0
S000005721	YOR195W	SLK19	Synthetic Lethal Kar3p	None	Kinetochore-associated protein	Kinetochore-associated protein; required for chromosome segregation and kinetochore clustering; required for normal segregation of chromosomes in meiosis and mitosis; component of the FEAR regulatory network, which promotes Cdc14p release from the nucleolus during anaphase; potential Cdc28p substrate	821	95325.1	YOR195W	chr15	709674	.	T	TA	3017.93	PASS	AF=1;AO=186;DP=194;FAO=191;FDP=191;FR=.;FRO=0;FSAF=103;FSAR=88;FSRF=0;FSRR=0;FWDB=0.0112209;FXX=0;HRUN=0;LEN=1;MLLD=283.869;OALT=A;OID=.;OMAPALT=TA;OPOS=709675;OREF=-;QD=63.2027;RBI=0.0182357;REFB=0;REVB=-0.0143748;RO=3;SAF=99;SAR=87;SRF=1;SRR=2;SSEN=0;SSEP=0;SSSB=0.0060335;STB=0.5;STBP=1;TYPE=ins;VARB=-1.49513e-06;ANN=TA|frameshift_variant|HIGH|YOR195W|YOR195W|transcript|TRANSCRIPT_YOR195W|prote…	GT:GQ:DP:FDP:RO:FRO:AO:FAO:AF:SAR:SAF:SRF:SRR:FSAR:FSAF:FSRF:FSRR	1/1:16:194:191:3:0:186:191:1:87:99:1:2:88:103:0:0
S000005116	YNL172W	APC1	Anaphase Promoting Complex subunit	anaphase promoting complex subunit 1	Largest subunit of the Anaphase-Promoting Complex/Cyclosome	Largest subunit of the Anaphase-Promoting Complex/Cyclosome; APC/C is a ubiquitin-protein ligase required for degradation of anaphase inhibitors, including mitotic cyclins, during the metaphase/anaphase transition; component of the platform domain of the APC/C, based on structural analysis; localizes to nuclear foci that become diffuse upon DNA replication stress	1748	196133	YNL172W	chr14	338964	.	A	AT	2859.63	PASS	AF=1;AO=206;DP=223;FAO=219;FDP=219;FR=.;FRO=0;FSAF=115;FSAR=104;FSRF=0;FSRR=0;FWDB=0.138736;FXX=0.00904936;HRUN=3;LEN=1;MLLD=19.0239;OALT=T;OID=.;OMAPALT=AT;OPOS=338965;OREF=-;QD=52.2306;RBI=0.139015;REFB=0;REVB=0.00880476;RO=12;SAF=111;SAR=95;SRF=5;SRR=7;SSEN=0;SSEP=0;SSSB=0.0128475;STB=0.5;STBP=1;TYPE=ins;VARB=0.00240794;ANN=AT|frameshift_variant|HIGH|YNL172W|YNL172W|transcript|TRANSCRIPT_YNL17…	GT:GQ:DP:FDP:RO:FRO:AO:FAO:AF:SAR:SAF:SRF:SRR:FSAR:FSAF:FSRF:FSRR	1/1:15:223:219:12:0:206:219:1:95:111:5:7:104:115:0:0
S000001254	YHR211W	FLO5	FLOcculation	flocculin FLO5	Lectin-like cell wall protein (flocculin) involved in flocculation	Lectin-like cell wall protein (flocculin) involved in flocculation; binds mannose chains on the surface of other cells, confers floc-forming ability that is chymotrypsin resistant but heat labile; important for co-flocculation with other yeasts, mediating interaction with specific species; FLO5 has a paralog, FLO1, that arose from a segmental duplication	1075	111927	YHR211W	chr08	524927	.	G	A	2865.98	PASS	AF=1;AO=182;DP=182;FAO=182;FDP=182;FR=.;FRO=0;FSAF=97;FSAR=85;FSRF=0;FSRR=0;FWDB=0.0360091;FXX=0;HRUN=2;LEN=1;MLLD=194.879;OALT=A;OID=.;OMAPALT=A;OPOS=524927;OREF=G;QD=62.9885;RBI=0.0389886;REFB=0;REVB=-0.0149484;RO=0;SAF=97;SAR=85;SRF=0;SRR=0;SSEN=0;SSEP=0;SSSB=5.12811e-08;STB=0.5;STBP=1;TYPE=snp;VARB=2.27886e-05;ANN=A|missense_variant|MODERATE|YHR211W|YHR211W|transcript|TRANSCRIPT_YHR211W|prote…	GT:GQ:DP:FDP:RO:FRO:AO:FAO:AF:SAR:SAF:SRF:SRR:FSAR:FSAF:FSRF:FSRR	1/1:15:182:182:0:0:182:182:1:85:97:0:0:85:97:0:0
S000000059	YAL063C	FLO9	FLOcculation	flocculin FLO9	Lectin-like protein with similarity to Flo1p	Lectin-like protein with similarity to Flo1p; thought to be expressed and involved in flocculation	1322	138013	YAL063C	chr01	33889	.	C	T	3167.26	PASS	AF=1;AO=200;DP=201;FAO=206;FDP=206;FR=.;FRO=0;FSAF=87;FSAR=119;FSRF=0;FSRR=0;FWDB=0.0152397;FXX=0.00483068;HRUN=1;LEN=1;MLLD=314.09;OALT=T;OID=.;OMAPALT=T;OPOS=33889;OREF=C;QD=61.5003;RBI=0.0193901;REFB=-0.141784;REVB=-0.0119886;RO=1;SAF=82;SAR=118;SRF=1;SRR=0;SSEN=0;SSEP=0;SSSB=-0.00577297;STB=0.5;STBP=1;TYPE=snp;VARB=0.000254591;ANN=T|missense_variant|MODERATE|YAL063C|YAL063C|transcript|TRANSCR…	GT:GQ:DP:FDP:RO:FRO:AO:FAO:AF:SAR:SAF:SRF:SRR:FSAR:FSAF:FSRF:FSRR	1/1:13:201:206:1:0:200:206:1:118:82:1:0:119:87:0:0
S000002942	YDR534C	FIT1	Facilitator of Iron Transport	None	Mannoprotein that is incorporated into the cell wall	Mannoprotein that is incorporated into the cell wall; incorporated via a glycosylphosphatidylinositol (GPI) anchor; involved in the retention of siderophore-iron in the cell wall	528	52462.8	YDR534C	chr04	1509753	.	T	C	306.314	PASS	AF=1;AO=23;DP=23;FAO=23;FDP=23;FR=.;FRO=0;FSAF=11;FSAR=12;FSRF=0;FSRR=0;FWDB=0.0386966;FXX=0;HRUN=2;LEN=1;MLLD=117.506;OALT=C;OID=.;OMAPALT=C;OPOS=1509753;OREF=T;QD=53.272;RBI=0.0578826;REFB=0;REVB=-0.0430461;RO=0;SAF=11;SAR=12;SRF=0;SRR=0;SSEN=0;SSEP=0;SSSB=0;STB=0.5;STBP=1;TYPE=snp;VARB=-4.60247e-05;ANN=C|missense_variant|MODERATE|YDR534C|YDR534C|transcript|TRANSCRIPT_YDR534C|protein_coding|1/1…	GT:GQ:DP:FDP:RO:FRO:AO:FAO:AF:SAR:SAF:SRF:SRR:FSAR:FSAF:FSRF:FSRR	1/1:4:23:23:0:0:23:23:1:12:11:0:0:12:11:0:0
S000003578	YJL042W	MHP1	MAP-Homologous Protein	None	Microtubule-associated protein involved in microtubule organization	Microtubule-associated protein involved in microtubule organization; involved in assembly and stabilization of microtubules; overproduction results in cell cycle arrest at G2 phase; similar to Drosophila protein MAP and to mammalian MAP4 proteins	1398	155204	YJL042W	chr10	373107	.	C	CG	1823.62	PASS	AF=1;AO=7;DP=170;FAO=168;FDP=168;FR=.;FRO=0;FSAF=79;FSAR=89;FSRF=0;FSRR=0;FWDB=0.0541139;FXX=0;HRUN=0;LEN=1;MLLD=150.903;OALT=G;OID=.;OMAPALT=CG;OPOS=373108;OREF=-;QD=43.4194;RBI=0.146285;REFB=0;REVB=-0.135908;RO=163;SAF=3;SAR=4;SRF=76;SRR=87;SSEN=0;SSEP=0;SSSB=-0.0327818;STB=0.5;STBP=1;TYPE=ins;VARB=0.00741381;ANN=CG|frameshift_variant|HIGH|YJL042W|YJL042W|transcript|TRANSCRIPT_YJL042W|protein_c…	GT:GQ:DP:FDP:RO:FRO:AO:FAO:AF:SAR:SAF:SRF:SRR:FSAR:FSAF:FSRF:FSRR	1/1:13:170:168:163:0:7:168:1:4:3:76:87:89:79:0:0
S000000280	YBR076W	ECM8	ExtraCellular Mutant	None	Non-essential protein of unknown function	Non-essential protein of unknown function	354	41783.1	YBR076W	chr02	390540	.	TG	T	3284.13	PASS	AF=1;AO=207;DP=213;FAO=213;FDP=213;FR=.;FRO=0;FSAF=100;FSAR=113;FSRF=0;FSRR=0;FWDB=-0.00471363;FXX=0;HRUN=1;LEN=1;MLLD=130.196;OALT=-;OID=.;OMAPALT=T;OPOS=390541;OREF=G;QD=61.6738;RBI=0.0125895;REFB=0;REVB=0.0116738;RO=0;SAF=97;SAR=110;SRF=0;SRR=0;SSEN=0;SSEP=0;SSSB=3.96854e-08;STB=0.5;STBP=1;TYPE=del;VARB=-7.39648e-05;ANN=T|frameshift_variant|HIGH|YBR076W|YBR076W|transcript|TRANSCRIPT_YBR076W|pr…	GT:GQ:DP:FDP:RO:FRO:AO:FAO:AF:SAR:SAF:SRF:SRR:FSAR:FSAF:FSRF:FSRR	1/1:18:213:213:0:0:207:213:1:110:97:0:0:113:100:0:0
S000001800	YKR092C	SRP40	Serine Rich Protein	None	Nucleolar serine-rich protein	Nucleolar serine-rich protein; role in preribosome assembly or transport; may function as a chaperone of small nucleolar ribonucleoprotein particles (snoRNPs); immunologically and structurally to rat Nopp140	406	40971.7	YKR092C	chr11	622631	.	ACTGCAGTCACTGCTGTCACTGCTG	A	2140.1	PASS	AF=1;AO=139;DP=150;FAO=140;FDP=140;FR=.;FRO=0;FSAF=64;FSAR=76;FSRF=0;FSRR=0;FWDB=0.0269516;FXX=0.0789422;HRUN=1;LEN=24;MLLD=697.219;OALT=-;OID=.;OMAPALT=A;OPOS=622632;OREF=CTGCAGTCACTGCTGTCACTGCTG;QD=61.1458;RBI=0.0483796;REFB=0;REVB=0.0401771;RO=0;SAF=63;SAR=76;SRF=0;SRR=0;SSEN=0;SSEP=0;SSSB=4.39859e-08;STB=0.5;STBP=1;TYPE=del;VARB=3.59712e-05;ANN=A|disruptive_inframe_deletion|MODERATE|YKR092C|Y…	GT:GQ:DP:FDP:RO:FRO:AO:FAO:AF:SAR:SAF:SRF:SRR:FSAR:FSAF:FSRF:FSRR	1/1:12:150:140:0:0:139:140:1:76:63:0:0:76:64:0:0
S000001612	YKL129C	MYO3	MYOsin	myosin 3	One of two type I myosins	One of two type I myosins; localizes to actin cortical patches; deletion of MYO3 has little effect on growth, but myo3 myo5 double deletion causes severe defects in growth and actin cytoskeleton organization; MYO3 has a paralog, MYO5, that arose from the whole genome duplication	1272	142497	YKL129C	chr11	202409	.	CTTTTTTG	CTTTTG,CTTTTTG,CTTTTTGT	752.351	PASS	AF=0,1,0;AO=4,72,4;DP=102;FAO=0,99,0;FDP=99;FR=.;FRO=0;FSAF=0,69,0;FSAR=0,30,0;FSRF=0;FSRR=0;FWDB=0.0768887,0.152643,-0.0193636;FXX=0.009999;HRUN=6,6,6;LEN=2,1,2;MLLD=9.85236,10.3616,12.7683;OALT=-,-,GT;OID=.,.,.;OMAPALT=CTTTTG,CTTTTTG,CTTTTTGT;OPOS=202410,202410,202415;OREF=TT,T,TG;QD=30.398;RBI=0.1203,0.237863,0.0555901;REFB=0,0,0;REVB=0.0925218,0.182425,0.0521086;RO=20;SAF=3,51,4;SAR=1,21,0;SR…	GT:GQ:DP:FDP:RO:FRO:AO:FAO:AF:SAR:SAF:SRF:SRR:FSAR:FSAF:FSRF:FSRR	2/2:3:102:99:20:0:4,72,4:0,99,0:0,1,0:1,21,0:3,51,4:12:8:0,30,0:0,69,0:0:0
S000001379	YIL117C	PRM5	Pheromone-Regulated Membrane protein	pheromone-regulated protein PRM5	Pheromone-regulated protein, predicted to have 1 transmembrane segment	Pheromone-regulated protein, predicted to have 1 transmembrane segment; induced during cell integrity signaling; PRM5 has a paralog, YNL058C, that arose from the whole genome duplication	318	34650	YIL117C	chr09	142746	.	CAA	CA,C,CCA	1225.39	PASS	AF=1,0,0;AO=98,37,8;DP=188;FAO=182,0,0;FDP=182;FR=.;FRO=0;FSAF=91,0,0;FSAR=91,0,0;FSRF=0;FSRR=0;FWDB=-0.173636,-0.0896449,-0.0380224;FXX=0.0618525;HRUN=7,7,7;LEN=1,2,1;MLLD=9.76456,10.0113,16.5863;OALT=-,-,C;OID=.,.,.;OMAPALT=CA,C,CCA;OPOS=142747,142747,142747;OREF=A,AA,A;QD=26.9317;RBI=0.188603,0.0971086,0.0710124;REFB=0.112767,0.105435,0.0633946;REVB=-0.0736326,-0.0373345,0.0599755;RO=26;SAF=47…	GT:GQ:DP:FDP:RO:FRO:AO:FAO:AF:SAR:SAF:SRF:SRR:FSAR:FSAF:FSRF:FSRR	1/1:3:188:182:26:0:98,37,8:182,0,0:1,0,0:51,11,8:47,26,0:17:9:91,0,0:91,0,0:0:0
S000002414	YDR007W	TRP1	TRyPtophan	phosphoribosylanthranilate isomerase TRP1	Phosphoribosylanthranilate isomerase	Phosphoribosylanthranilate isomerase; catalyzes the third step in tryptophan biosynthesis; in 2004, the sequence of TRP1 from strain S228C was updated by changing the previously annotated internal STOP (TAA) to serine (TCA); enhances vegetative growth at low and high temperatures when used as an auxotrophic marker in strains such as W303	224	24139.7	YDR007W	chr04	471218	.	G	T	3238.51	PASS	AF=1;AO=210;DP=211;FAO=210;FDP=210;FR=.;FRO=0;FSAF=114;FSAR=96;FSRF=0;FSRR=0;FWDB=-0.0186979;FXX=0.00473911;HRUN=2;LEN=1;MLLD=215.12;OALT=T;OID=.;OMAPALT=T;OPOS=471218;OREF=G;QD=61.686;RBI=0.0231242;REFB=-0.0760861;REVB=0.0136058;RO=1;SAF=114;SAR=96;SRF=0;SRR=1;SSEN=0;SSEP=0;SSSB=0.00493653;STB=0.5;STBP=1;TYPE=snp;VARB=6.96425e-05;ANN=T|stop_gained|HIGH|YDR007W|YDR007W|transcript|TRANSCRIPT_YDR00…	GT:GQ:DP:FDP:RO:FRO:AO:FAO:AF:SAR:SAF:SRF:SRR:FSAR:FSAF:FSRF:FSRR	1/1:13:211:210:1:0:210:210:1:96:114:0:1:96:114:0:0
S000005020	YNL076W	MKS1	Multicopy Kinase Suppressor	LYS80	Pleiotropic negative transcriptional regulator	Pleiotropic negative transcriptional regulator; involved in Ras-CAMP and lysine biosynthetic pathways and nitrogen regulation; involved in retrograde (RTG) mitochondria-to-nucleus signaling	584	65656.6	YNL076W	chr14	508130	.	C	T	3572.54	PASS	AF=1;AO=227;DP=227;FAO=227;FDP=227;FR=.;FRO=0;FSAF=107;FSAR=120;FSRF=0;FSRR=0;FWDB=0.00614817;FXX=0;HRUN=1;LEN=1;MLLD=149.76;OALT=T;OID=.;OMAPALT=T;OPOS=508130;OREF=C;QD=62.9523;RBI=0.0116698;REFB=0;REVB=-0.00991891;RO=0;SAF=107;SAR=120;SRF=0;SRR=0;SSEN=0;SSEP=0;SSSB=-3.30101e-08;STB=0.5;STBP=1;TYPE=snp;VARB=-4.00144e-06;ANN=T|missense_variant|MODERATE|YNL076W|YNL076W|transcript|TRANSCRIPT_YNL076…	GT:GQ:DP:FDP:RO:FRO:AO:FAO:AF:SAR:SAF:SRF:SRR:FSAR:FSAF:FSRF:FSRR	1/1:19:227:227:0:0:227:227:1:120:107:0:0:120:107:0:0
S000005875	YOR348C	PUT4	Proline UTilization	proline permease PUT4	Proline permease	Proline permease; required for high-affinity transport of proline; also transports the toxic proline analog azetidine-2-carboxylate (AzC); PUT4 transcription is repressed in ammonia-grown cells	627	68789.1	YOR348C	chr15	987144	.	C	A	2999.52	PASS	AF=1;AO=117;DP=187;FAO=187;FDP=187;FR=.,HEALED;FRO=0;FSAF=106;FSAR=81;FSRF=0;FSRR=0;FWDB=0.0899135;FXX=0.00531887;HRUN=1;LEN=1;MLLD=215.042;OALT=A;OID=.;OMAPALT=A;OPOS=987144;OREF=C;QD=64.1608;RBI=0.0905643;REFB=0;REVB=0.0108372;RO=0;SAF=40;SAR=77;SRF=0;SRR=0;SSEN=0;SSEP=0;SSSB=0;STB=0.5;STBP=1;TYPE=snp;VARB=0.000550762;ANN=A|missense_variant|MODERATE|YOR348C|YOR348C|transcript|TRANSCRIPT_YOR348C…	GT:GQ:DP:FDP:RO:FRO:AO:FAO:AF:SAR:SAF:SRF:SRR:FSAR:FSAF:FSRF:FSRR	1/1:16:187:187:0:0:117:187:1:77:40:0:0:81:106:0:0
S000001062	YHR020W	None	None	proline--tRNA ligase	Prolyl-tRNA synthetase	Prolyl-tRNA synthetase; N-terminal domain shows weak homology to prokaryotic posttransfer editing domain, but does not possess posttransfer editing activity; may interact with ribosomes, based on co-purification experiments	688	77378.9	YHR020W	chr08	138547	.	G	C,GC	2247.47	PASS	AF=0,1;AO=3,121;DP=146;FAO=0,144;FDP=144;FR=.;FRO=0;FSAF=0,70;FSAR=0,74;FSRF=0;FSRR=0;FWDB=0.0475004,0.0604159;FXX=0.0204068;HRUN=1,0;LEN=1,1;MLLD=55.0788,127.225;OALT=C,C;OID=.,.;OMAPALT=C,GC;OPOS=138547,138548;OREF=G,-;QD=62.4296;RBI=0.0609096,0.0659745;REFB=0,0;REVB=0.0381273,0.0265058;RO=21;SAF=1,50;SAR=2,71;SRF=20;SRR=1;SSEN=0,0;SSEP=0,0;SSSB=-0.71218,-0.15078;STB=0.5,0.5;STBP=1,1;TYPE=snp,i…	GT:GQ:DP:FDP:RO:FRO:AO:FAO:AF:SAR:SAF:SRF:SRR:FSAR:FSAF:FSRF:FSRR	2/2:12:146:144:21:0:3,121:0,144:0,1:2,71:1,50:20:1:0,74:0,70:0:0
S000000248	YBR044C	TCM62	TriCarboxylic acid cycle Mutant	None	Protein involved in assembly of the succinate dehydrogenase complex	Protein involved in assembly of the succinate dehydrogenase complex; mitochondrial; putative chaperone	572	64267.8	YBR044C	chr02	324462	.	C	CT	1872.01	PASS	AF=1;AO=146;DP=189;FAO=182;FDP=182;FR=.;FRO=0;FSAF=95;FSAR=87;FSRF=0;FSRR=0;FWDB=0.162641;FXX=0;HRUN=4;LEN=1;MLLD=13.8792;OALT=T;OID=.;OMAPALT=CT;OPOS=324463;OREF=-;QD=41.143;RBI=0.24111;REFB=0;REVB=0.177994;RO=38;SAF=86;SAR=60;SRF=10;SRR=28;SSEN=0;SSEP=0;SSSB=0.127583;STB=0.5;STBP=1;TYPE=ins;VARB=0.00373551;ANN=CT|frameshift_variant|HIGH|YBR044C|YBR044C|transcript|TRANSCRIPT_YBR044C|protein_codi…	GT:GQ:DP:FDP:RO:FRO:AO:FAO:AF:SAR:SAF:SRF:SRR:FSAR:FSAF:FSRF:FSRR	1/1:11:189:182:38:0:146:182:1:60:86:10:28:87:95:0:0
S000000420	YBR216C	YBP1	Yap1-Binding Protein	None	Protein involved in cellular response to oxidative stress	Protein involved in cellular response to oxidative stress; required for oxidation of specific cysteine residues of transcription factor Yap1p, resulting in nuclear localization of Yap1p in response to stress; YBP1 has a paralog, YBP2, that arose from the whole genome duplication	674	77730.1	YBR216C	chr02	663081	.	A	AG,AGG	1933.47	PASS	AF=1,0;AO=172,16;DP=214;FAO=200,0;FDP=200;FR=.;FRO=0;FSAF=100,0;FSAR=100,0;FSRF=0;FSRR=0;FWDB=-0.0628105,-0.0317106;FXX=0;HRUN=5,5;LEN=1,2;MLLD=12.8915,8.98826;OALT=G,GG;OID=.,.;OMAPALT=AG,AGG;OPOS=663082,663082;OREF=-,-;QD=38.6695;RBI=0.074166,0.0378268;REFB=-0.0113415,-0.0129633;REVB=-0.039439,-0.0206228;RO=26;SAF=88,7;SAR=84,9;SRF=15;SRR=11;SSEN=0,0;SSEP=0,0;SSSB=-0.016238,-0.146985;STB=0.5,0.…	GT:GQ:DP:FDP:RO:FRO:AO:FAO:AF:SAR:SAF:SRF:SRR:FSAR:FSAF:FSRF:FSRR	1/1:7:214:200:26:0:172,16:200,0:1,0:84,9:88,7:15:11:100,0:100,0:0:0
S000004238	YLR248W	RCK2	Radiation sensitivity Complementing Kinase	serine/threonine protein kinase RCK2 CLK1 CMK3	Protein kinase involved in response to oxidative and osmotic stress	Protein kinase involved in response to oxidative and osmotic stress; identified as suppressor of S. pombe cell cycle checkpoint mutations; similar to CaM (calmodulin) kinases; RCK2 has a paralog, RCK1, that arose from the whole genome duplication	610	68043.1	YLR248W	chr12	631993	.	G	A	2563.01	PASS	AF=1;AO=152;DP=166;FAO=166;FDP=166;FR=.,HEALED;FRO=0;FSAF=93;FSAR=73;FSRF=0;FSRR=0;FWDB=0.0647946;FXX=0;HRUN=1;LEN=1;MLLD=116.924;OALT=A;OID=.;OMAPALT=A;OPOS=631993;OREF=G;QD=61.7593;RBI=0.0651598;REFB=0;REVB=-0.0068889;RO=0;SAF=80;SAR=72;SRF=0;SRR=0;SSEN=0;SSEP=0;SSSB=3.66134e-08;STB=0.5;STBP=1;TYPE=snp;VARB=0.000215125;ANN=A|missense_variant|MODERATE|YLR248W|YLR248W|transcript|TRANSCRIPT_YLR248…	GT:GQ:DP:FDP:RO:FRO:AO:FAO:AF:SAR:SAF:SRF:SRR:FSAR:FSAF:FSRF:FSRR	1/1:14:166:166:0:0:152:166:1:72:80:0:0:73:93:0:0
S000004428	YLR436C	ECM30	ExtraCellular Mutant	None	Protein of unknown function	Protein of unknown function; may play a role in cell wall biosynthesis, mutants have abormal relative levels of mannose and glucose and have Gap1p sorting and transport defects; (GFP)-fusion protein localizes to the cytoplasm	1274	145053	YLR436C	chr12	1004866	.	C	CA	2517.64	PASS	AF=1;AO=165;DP=170;FAO=169;FDP=169;FR=.;FRO=0;FSAF=90;FSAR=79;FSRF=0;FSRR=0;FWDB=0.054802;FXX=0.00588201;HRUN=1;LEN=1;MLLD=27.6616;OALT=A;OID=.;OMAPALT=CA;OPOS=1004867;OREF=-;QD=59.589;RBI=0.0718844;REFB=0;REVB=-0.04652;RO=3;SAF=86;SAR=79;SRF=2;SRR=1;SSEN=0;SSEP=0;SSSB=-0.0049517;STB=0.5;STBP=1;TYPE=ins;VARB=0.000173436;ANN=CA|frameshift_variant|HIGH|YLR436C|YLR436C|transcript|TRANSCRIPT_YLR436C|…	GT:GQ:DP:FDP:RO:FRO:AO:FAO:AF:SAR:SAF:SRF:SRR:FSAR:FSAF:FSRF:FSRR	1/1:14:170:169:3:0:165:169:1:79:86:2:1:79:90:0:0
S000004384	YLR392C	ART10	Arrestin-Related Trafficking adaptors	None	Protein of unknown function that contains 2 PY motifs	Protein of unknown function that contains 2 PY motifs; ubiquinated by Rsp5p; overexpression confers resistance to arsenite; green fluorescent protein (GFP)-fusion protein localizes it to the cytoplasm; non-essential gene	518	59765.9	YLR392C	chr12	898418	.	T	A	3811.63	PASS	AF=1;AO=228;DP=241;FAO=241;FDP=241;FR=.,HEALED;FRO=0;FSAF=114;FSAR=127;FSRF=0;FSRR=0;FWDB=0.017302;FXX=0;HRUN=1;LEN=1;MLLD=273.948;OALT=A;OID=.;OMAPALT=A;OPOS=898418;OREF=T;QD=63.2636;RBI=0.0361024;REFB=0;REVB=0.0316864;RO=0;SAF=106;SAR=122;SRF=0;SRR=0;SSEN=0;SSEP=0;SSSB=0;STB=0.5;STBP=1;TYPE=snp;VARB=0.000319754;ANN=A|missense_variant|MODERATE|YLR392C|YLR392C|transcript|TRANSCRIPT_YLR392C|protei…	GT:GQ:DP:FDP:RO:FRO:AO:FAO:AF:SAR:SAF:SRF:SRR:FSAR:FSAF:FSRF:FSRR	1/1:20:241:241:0:0:228:241:1:122:106:0:0:127:114:0:0
S000002557	YDR150W	NUM1	NUclear Migration	PAC12	Protein required for nuclear migration	Protein required for nuclear migration; component of the mitochondria-ER-cortex-ancor (MECA); required for the association of mitochondria with the cell cortex and for accurate distribution of mitochondrial network; interacts with Mdm36p to link the ER and mitochondria at the cortex; localizes to the mother cell cortex and the bud tip; may mediate interactions of dynein and cytoplasmic microtubul…	2748	312912	YDR150W	chr04	761864	.	T	C	769.507	PASS	AF=1;AO=54;DP=54;FAO=54;FDP=54;FR=.;FRO=0;FSAF=26;FSAR=28;FSRF=0;FSRR=0;FWDB=0.0120411;FXX=0;HRUN=2;LEN=1;MLLD=68.365;OALT=C;OID=.;OMAPALT=C;OPOS=761864;OREF=T;QD=57.0005;RBI=0.0224604;REFB=0;REVB=0.0189601;RO=0;SAF=26;SAR=28;SRF=0;SRR=0;SSEN=0;SSEP=0;SSSB=3.52846e-08;STB=0.5;STBP=1;TYPE=snp;VARB=0.000353309;ANN=C|missense_variant|MODERATE|YDR150W|YDR150W|transcript|TRANSCRIPT_YDR150W|protein_cod…	GT:GQ:DP:FDP:RO:FRO:AO:FAO:AF:SAR:SAF:SRF:SRR:FSAR:FSAF:FSRF:FSRR	1/1:4:54:54:0:0:54:54:1:28:26:0:0:28:26:0:0
S000004000	YLR010C	TEN1	TElomeric pathways with STn1	None	Protein that regulates telomeric length	Protein that regulates telomeric length; protects telomeric ends in a complex with Cdc13p and Stn1p; similar to human Ten1 which is critical for the telomeric function of the CST (Cdc13p-Stn1p-Ten1p) complex	160	18604.8	YLR010C	chr12	168497	.	A	AT	2756.23	PASS	AF=1;AO=180;DP=184;FAO=180;FDP=180;FR=.;FRO=0;FSAF=95;FSAR=85;FSRF=0;FSRR=0;FWDB=-0.0357376;FXX=0.00552456;HRUN=1;LEN=1;MLLD=31.1133;OALT=T;OID=.;OMAPALT=AT;OPOS=168498;OREF=-;QD=61.2495;RBI=0.0416051;REFB=0;REVB=-0.0213027;RO=3;SAF=95;SAR=85;SRF=2;SRR=1;SSEN=0;SSEP=0;SSSB=-0.00434835;STB=0.5;STBP=1;TYPE=ins;VARB=-0.000501146;ANN=AT|frameshift_variant|HIGH|YLR010C|YLR010C|transcript|TRANSCRIPT_YL…	GT:GQ:DP:FDP:RO:FRO:AO:FAO:AF:SAR:SAF:SRF:SRR:FSAR:FSAF:FSRF:FSRR	1/1:15:184:180:3:0:180:180:1:85:95:2:1:85:95:0:0
S000002623	YDR215C	None	None	None	Putative protein of unknown function	Putative protein of unknown function; conserved across S. cerevisiae strains; null mutant displays elevated sensitivity to expression of a mutant huntingtin fragment or of alpha-synuclein	137	15190.8	YDR215C	chr04	897906	.	A	AG,G	1802.31	PASS	AF=1,0;AO=118,3;DP=127;FAO=122,0;FDP=122;FR=.;FRO=0;FSAF=50,0;FSAR=72,0;FSRF=0;FSRR=0;FWDB=0.021259,0.0162782;FXX=0;HRUN=2,3;LEN=1,1;MLLD=28.0899,7.36241;OALT=G,G;OID=.,.;OMAPALT=AG,G;OPOS=897907,897906;OREF=-,A;QD=59.092;RBI=0.0438172,0.0195814;REFB=0,0;REVB=0.0383145,-0.0108835;RO=6;SAF=49,0;SAR=69,3;SRF=5;SRR=1;SSEN=0,0;SSEP=0,0;SSSB=-0.039209,-0.754726;STB=0.5,0.5;STBP=1,1;TYPE=ins,snp;VARB=0…	GT:GQ:DP:FDP:RO:FRO:AO:FAO:AF:SAR:SAF:SRF:SRR:FSAR:FSAF:FSRF:FSRR	1/1:9:127:122:6:0:118,3:122,0:1,0:69,3:49,0:5:1:72,0:50,0:0:0
S000004936	YMR317W	None	None	None	Putative protein of unknown function	Putative protein of unknown function; has some similarity to sialidase from Trypanosoma; YMR317W is not an essential gene	1140	113166	YMR317W	chr13	916359	.	G	A	4767.3	PASS	AF=1;AO=305;DP=305;FAO=305;FDP=305;FR=.;FRO=0;FSAF=184;FSAR=121;FSRF=0;FSRR=0;FWDB=0.0183777;FXX=0;HRUN=1;LEN=1;MLLD=115.247;OALT=A;OID=.;OMAPALT=A;OPOS=916359;OREF=G;QD=62.522;RBI=0.0248375;REFB=0;REVB=0.0167082;RO=0;SAF=184;SAR=121;SRF=0;SRR=0;SSEN=0;SSEP=0;SSSB=0;STB=0.5;STBP=1;TYPE=snp;VARB=4.94449e-05;ANN=A|missense_variant|MODERATE|YMR317W|YMR317W|transcript|TRANSCRIPT_YMR317W|protein_codin…	GT:GQ:DP:FDP:RO:FRO:AO:FAO:AF:SAR:SAF:SRF:SRR:FSAR:FSAF:FSRF:FSRR	1/1:26:305:305:0:0:305:305:1:121:184:0:0:121:184:0:0
S000003729	YJL193W	None	None	None	Putative protein of unknown function	Putative protein of unknown function; predicted to encode a triose phosphate transporter subfamily member based on phylogenetic analysis; similar to YOR307C/SLY41; deletion mutant has a respiratory growth defect	402	45954.7	YJL193W	chr10	75099	.	AATT	AA,AAT,AT	829.202	PASS	AF=0,1,0;AO=10,63,4;DP=105;FAO=0,103,0;FDP=103;FR=.;FRO=0;FSAF=0,76,0;FSAR=0,27,0;FSRF=0;FSRR=0;FWDB=-0.035707,-0.0696533,-0.101378;FXX=0.046292;HRUN=7,7,2;LEN=2,1,2;MLLD=9.36977,10.868,8.87538;OALT=-,-,-;OID=.,.,.;OMAPALT=AA,AAT,AT;OPOS=75101,75101,75100;OREF=TT,T,AT;QD=32.202;RBI=0.0559619,0.109453,0.224863;REFB=0.00518414,0.00327014,0.012355;REVB=-0.04309,-0.08443,-0.200713;RO=19;SAF=7,54,0;SA…	GT:GQ:DP:FDP:RO:FRO:AO:FAO:AF:SAR:SAF:SRF:SRR:FSAR:FSAF:FSRF:FSRR	2/2:3:105:103:19:0:10,63,4:0,103,0:0,1,0:3,9,4:7,54,0:13:6:0,27,0:0,76,0:0:0
S000001018	YHL026C	None	None	None	Putative protein of unknown function	Putative protein of unknown function; transcriptionally regulated by Upc2p via an upstream sterol response element; SWAT-GFP fusion protein localizes to the cell periphery, while mCherry fusion localizes to both the cell periphery and vacuole; YHL026C is not an essential gene; in 2005 the start site was moved 141 nt upstream (see Locus History)	315	35716.5	YHL026C	chr08	53776	.	T	C	3573.85	PASS	AF=1;AO=228;DP=229;FAO=228;FDP=228;FR=.;FRO=0;FSAF=131;FSAR=97;FSRF=0;FSRR=0;FWDB=0.000527094;FXX=0.00436662;HRUN=3;LEN=1;MLLD=201.796;OALT=C;OID=.;OMAPALT=C;OPOS=53776;OREF=T;QD=62.6991;RBI=0.00809535;REFB=-0.0706682;REVB=-0.00807817;RO=0;SAF=131;SAR=97;SRF=0;SRR=0;SSEN=0;SSEP=0;SSSB=-3.33571e-08;STB=0.5;STBP=1;TYPE=snp;VARB=4.37817e-05;ANN=C|missense_variant|MODERATE|YHL026C|YHL026C|transcript|…	GT:GQ:DP:FDP:RO:FRO:AO:FAO:AF:SAR:SAF:SRF:SRR:FSAR:FSAF:FSRF:FSRR	1/1:14:229:228:0:0:228:228:1:97:131:0:0:97:131:0:0
S000003977	YLL054C	None	None	None	Putative protein of unknown function with similarity to Pip2p	Putative protein of unknown function with similarity to Pip2p; an oleate-specific transcriptional activator of peroxisome proliferation; YLL054C is not an essential gene	843	97601	YLL054C	chr12	34586	.	AAATATTCCAAACTTAGAATGTCAGAATCTCCTTCTGGAATC	A	910.679	PASS	AF=1;AO=60;DP=70;FAO=61;FDP=61;FR=.;FRO=0;FSAF=28;FSAR=33;FSRF=0;FSRR=0;FWDB=0.00524164;FXX=0.128553;HRUN=3;LEN=41;MLLD=1210.71;OALT=-;OID=.;OMAPALT=A;OPOS=34587;OREF=AATATTCCAAACTTAGAATGTCAGAATCTCCTTCTGGAATC;QD=59.7167;RBI=0.0161224;REFB=0;REVB=0.0152465;RO=0;SAF=27;SAR=33;SRF=0;SRR=0;SSEN=0;SSEP=0;SSSB=5.7886e-08;STB=0.5;STBP=1;TYPE=del;VARB=6.61895e-06;ANN=A|frameshift_variant|HIGH|YLL054C|YLL…	GT:GQ:DP:FDP:RO:FRO:AO:FAO:AF:SAR:SAF:SRF:SRR:FSAR:FSAF:FSRF:FSRR	1/1:5:70:61:0:0:60:61:1:33:27:0:0:33:28:0:0
S000001681	YKL198C	PTK1	Putative serine/Threonine protein Kinase	putative serine/threonine protein kinase PTK1 YKL199C YKT9 POT1 KKT8 STK1	Putative serine/threonine protein kinase	Putative serine/threonine protein kinase; regulates spermine uptake; involved in polyamine transport; possible mitochondrial protein; PTK1 has a paralog, PTK2, that arose from the whole genome duplication	662	73520.4	YKL198C	chr11	68407	.	AC	A	3292.9	PASS	AF=1;AO=209;DP=215;FAO=214;FDP=214;FR=.;FRO=0;FSAF=92;FSAR=122;FSRF=0;FSRR=0;FWDB=0.0144376;FXX=0.00465095;HRUN=2;LEN=1;MLLD=32.3814;OALT=-;OID=.;OMAPALT=A;OPOS=68408;OREF=C;QD=61.5496;RBI=0.138045;REFB=0;REVB=-0.137288;RO=0;SAF=88;SAR=121;SRF=0;SRR=0;SSEN=0;SSEP=0;SSSB=-3.97716e-08;STB=0.5;STBP=1;TYPE=del;VARB=-0.000667819;ANN=A|frameshift_variant|HIGH|YKL198C|YKL198C|transcript|TRANSCRIPT_YKL19…	GT:GQ:DP:FDP:RO:FRO:AO:FAO:AF:SAR:SAF:SRF:SRR:FSAR:FSAF:FSRF:FSRR	1/1:18:215:214:0:0:209:214:1:121:88:0:0:122:92:0:0
S000003329	YGR097W	ASK10	Activator of SKn7	RGC2	Regulator of the Fps1p glycerol channel	Regulator of the Fps1p glycerol channel; under nonstress conditions, binds to Fps1p to positively regulate glycerol transport; under osmotic stress, multiple phosphorylation by Hog1p causes Ask10p to dissociate from Fps1p; forms homodimers and heterodimerizes with paralog Rgc1p; phosphorylated in response to oxidative stress; has a role in destruction of Ssn8p; associates with RNA polymerase II h…	1146	126895	YGR097W	chr07	687198	.	C	CA	2617.68	PASS	AF=1;AO=164;DP=170;FAO=170;FDP=170;FR=.;FRO=0;FSAF=79;FSAR=91;FSRF=0;FSRR=0;FWDB=0.00741694;FXX=0;HRUN=0;LEN=1;MLLD=98.9973;OALT=A;OID=.;OMAPALT=CA;OPOS=687199;OREF=-;QD=61.5925;RBI=0.00814854;REFB=0;REVB=0.00337457;RO=4;SAF=75;SAR=89;SRF=3;SRR=1;SSEN=0;SSEP=0;SSSB=-0.0133347;STB=0.5;STBP=1;TYPE=ins;VARB=1.66834e-05;ANN=CA|frameshift_variant|HIGH|YGR097W|YGR097W|transcript|TRANSCRIPT_YGR097W|prot…	GT:GQ:DP:FDP:RO:FRO:AO:FAO:AF:SAR:SAF:SRF:SRR:FSAR:FSAF:FSRF:FSRR	1/1:14:170:170:4:0:164:170:1:89:75:3:1:91:79:0:0
S000002674	YDR266C	HEL2	Histone E3 Ligase	E3 ubiquitin-protein ligase HEL2	RING finger ubiquitin ligase (E3)	RING finger ubiquitin ligase (E3); involved in ubiquitination and degradation of excess histones; interacts with Ubc4p and Rad53p; null mutant sensitive to hydroxyurea (HU); green fluorescent protein (GFP)-fusion protein localizes to the cytoplasm; computational analysis suggests a role as a transcription factor	639	72779	YDR266C	chr04	1004919	.	G	GT,T	1772.63	PASS	AF=1,0;AO=129,4;DP=173;FAO=163,0;FDP=163;FR=.;FRO=0;FSAF=77,0;FSAR=86,0;FSRF=0;FSRR=0;FWDB=-0.0376084,0.00891721;FXX=0.0239507;HRUN=4,1;LEN=1,1;MLLD=14.6428,172.22;OALT=T,T;OID=.,.;OMAPALT=GT,T;OPOS=1004920,1004919;OREF=-,G;QD=43.5001;RBI=0.146084,0.00934844;REFB=0,0;REVB=0.14116,0.00280655;RO=34;SAF=64,2;SAR=65,2;SRF=14;SRR=20;SSEN=0,0;SSEP=0,0;SSSB=0.0330971,0.0978691;STB=0.5,0.5;STBP=1,1;TYPE=…	GT:GQ:DP:FDP:RO:FRO:AO:FAO:AF:SAR:SAF:SRF:SRR:FSAR:FSAF:FSRF:FSRR	1/1:11:173:163:34:0:129,4:163,0:1,0:65,2:64,2:14:20:86,0:77,0:0:0
S000006068	YPL147W	PXA1	PeroXisomal ABC-transporter	LPI1 PAL1 PAT2 SSH2 ATP-binding cassette long-chain fatty acid transporter PXA1	Subunit of heterodimeric peroxisomal ABC transport complex, with Pxa2p	Subunit of heterodimeric peroxisomal ABC transport complex, with Pxa2p; required for import of long-chain fatty acids into peroxisomes; similar to human adrenoleukodystrophy transporters ABCD1and ABCD2, and ALD-related proteins; mutations in ABCD1 cause X-linked adrenoleukodystrophy (X-ALD), a peroxisomal disorder; human ABCD1 and ABCD2 can each partially complement yeast pxa1 pxa2 double null mu…	870	100058	YPL147W	chr16	275245	.	A	AC	2816.96	PASS	AF=1;AO=179;DP=182;FAO=180;FDP=180;FR=.;FRO=0;FSAF=103;FSAR=77;FSRF=0;FSRR=0;FWDB=-0.0648455;FXX=0.0217379;HRUN=1;LEN=1;MLLD=33.0932;OALT=C;OID=.;OMAPALT=AC;OPOS=275246;OREF=-;QD=62.5991;RBI=0.0690745;REFB=0;REVB=0.0237979;RO=1;SAF=102;SAR=77;SRF=1;SRR=0;SSEN=0;SSEP=0;SSSB=-0.00464464;STB=0.5;STBP=1;TYPE=ins;VARB=-0.000328165;ANN=AC|frameshift_variant|HIGH|YPL147W|YPL147W|transcript|TRANSCRIPT_YP…	GT:GQ:DP:FDP:RO:FRO:AO:FAO:AF:SAR:SAF:SRF:SRR:FSAR:FSAF:FSRF:FSRR	1/1:15:182:180:1:0:179:180:1:77:102:1:0:77:103:0:0
S000004772	YMR162C	DNF3	Drs2 Neo1 Family	aminophospholipid-translocating P4-type ATPase DNF3	Trans-golgi network aminophospholipid translocase (flippase)	Trans-golgi network aminophospholipid translocase (flippase); type 4 P-type ATPase; involved in phospholipid translocation, contributing to the maintenance of membrane lipid asymmetry in post-Golgi secretory vesicles; role in protein trafficking between the Golgi and endosomal system; localizes to the trans-Golgi network; localizes to the shmoo tip where it has a redundant role in the cellular re…	1656	188309	YMR162C	chr13	589833	.	ATTTTTTT	ATTTTT,ATTTTTT,ATTTTTTG	786.423	PASS	AF=0,1,0;AO=29,76,5;DP=162;FAO=0,156,0;FDP=156;FR=.;FRO=0;FSAF=0,85,0;FSAR=0,71,0;FSRF=0;FSRR=0;FWDB=0.00958355,0.014643,0.110436;FXX=0.0429422;HRUN=7,7,7;LEN=2,1,1;MLLD=9.40282,7.22337,12.1409;OALT=-,-,G;OID=.,.,.;OMAPALT=ATTTTT,ATTTTTT,ATTTTTTG;OPOS=589834,589834,589840;OREF=TT,T,T;QD=20.1647;RBI=0.0966493,0.192128,0.142149;REFB=0,0,0;REVB=-0.096173,-0.191569,-0.0895006;RO=26;SAF=13,41,3;SAR=16…	GT:GQ:DP:FDP:RO:FRO:AO:FAO:AF:SAR:SAF:SRF:SRR:FSAR:FSAF:FSRF:FSRR	2/2:4:162:156:26:0:29,76,5:0,156,0:0,1,0:16,35,2:13,41,3:16:10:0,71,0:0,85,0:0:0
S000001871	YFL023W	BUD27	BUD site selection	URI1	Unconventional prefoldin protein involved in translation initiation	Unconventional prefoldin protein involved in translation initiation; required for correct assembly of RNAP I, II, and III in an Rpb5p-dependent manner; shuttles between nucleus and cytoplasm; mutants have inappropriate expression of nutrient sensitive genes due to translational derepression of Gcn4p transcription factor; diploid mutants show random budding; ortholog of human URI/RMP	796	91351.3	YFL023W	chr06	94664	.	C	A	1682.83	PASS	AF=1;AO=111;DP=112;FAO=112;FDP=112;FR=.;FRO=0;FSAF=51;FSAR=61;FSRF=0;FSRR=0;FWDB=0.0132436;FXX=0;HRUN=2;LEN=1;MLLD=59.8959;OALT=A;OID=.;OMAPALT=A;OPOS=94664;OREF=C;QD=60.1012;RBI=0.0154871;REFB=0;REVB=0.00802859;RO=0;SAF=50;SAR=61;SRF=0;SRR=0;SSEN=0;SSEP=0;SSSB=0;STB=0.5;STBP=1;TYPE=snp;VARB=0.000171342;ANN=A|missense_variant|MODERATE|YFL023W|YFL023W|transcript|TRANSCRIPT_YFL023W|protein_coding|1…	GT:GQ:DP:FDP:RO:FRO:AO:FAO:AF:SAR:SAF:SRF:SRR:FSAR:FSAF:FSRF:FSRR	1/1:9:112:112:0:0:111:112:1:61:50:0:0:61:51:0:0
S000003585	YJL049W	CHM7	CHarged Multivesicular body protein	None	Yeast homolog of human CHMP7, localizes to the endoplasmic reticulum	Yeast homolog of human CHMP7, localizes to the endoplasmic reticulum presumably as part of an ESCRT-III like complex; null mutant has growth defect at 37 C in an apq12 deletion background; non-essential gene	450	52832.8	YJL049W	chr10	350368	.	T	G	3384.77	PASS	AF=1;AO=217;DP=217;FAO=217;FDP=217;FR=.;FRO=0;FSAF=110;FSAR=107;FSRF=0;FSRR=0;FWDB=-0.014768;FXX=0;HRUN=2;LEN=1;MLLD=68.1825;OALT=G;OID=.;OMAPALT=G;OPOS=350368;OREF=T;QD=62.3922;RBI=0.0394581;REFB=0;REVB=0.0365902;RO=0;SAF=110;SAR=107;SRF=0;SRR=0;SSEN=0;SSEP=0;SSSB=3.59946e-08;STB=0.5;STBP=1;TYPE=snp;VARB=6.82584e-05;ANN=G|missense_variant|MODERATE|YJL049W|YJL049W|transcript|TRANSCRIPT_YJL049W|pr…	GT:GQ:DP:FDP:RO:FRO:AO:FAO:AF:SAR:SAF:SRF:SRR:FSAR:FSAF:FSRF:FSRR	1/1:18:217:217:0:0:217:217:1:107:110:0:0:107:110:0:0

## Sheet: pup2-10 mutant
SGDID	Systematic	Gene	Gene Name	Alias	Short Description	Description	Length	MW	Systematics	CHROM	POS	ID	REF	ALT	QUAL	FILTER	INFO	GT	AD
S000003485	YGR253C	PUP2	PUtative Proteasome subunit	proteasome core particle subunit alpha 5 DOA5	Alpha 5 subunit of the 20S proteasome	Alpha 5 subunit of the 20S proteasome; involved in ubiquitin-dependent catabolism; human homolog is subunit zeta	260	28596.3	YGR253C	chr07	1014045	.	A	G	1116.95	PASS	AF=1;AO=74;DP=74;FAO=74;FDP=74;FR=.;FRO=0;FSAF=34;FSAR=40;FSRF=0;FSRR=0;FWDB=-0.00609058;FXX=0;HRUN=1;LEN=1;MLLD=86.3544;OALT=G;OID=.;OMAPALT=G;OPOS=1014045;OREF=A;QD=60.3756;RBI=0.0137995;REFB=0;REVB=0.0123826;RO=0;SAF=34;SAR=40;SRF=0;SRR=0;SSEN=0;SSEP=0;SSSB=0;STB=0.5;STBP=1;TYPE=snp;VARB=4.52625e-05;ANN=G|missense_variant|MODERATE|YGR253C|YGR253C|transcript|TRANSCRIPT_YGR253C|protein_coding|1/…	GT:GQ:DP:FDP:RO:FRO:AO:FAO:AF:SAR:SAF:SRF:SRR:FSAR:FSAF:FSRF:FSRR	1/1:6:74:74:0:0:74:74:1:40:34:0:0:40:34:0:0
S000001729	YKR021W	ALY1	Arrestin-Like Yeast protein	ART6	Alpha arrestin, substrate of calcineurin	Alpha arrestin, substrate of calcineurin; controls nutrient-mediated intracellular sorting of permease Gap1p; interacts with AP-1 subunit Apl4p; dephosphorylation of Aly1p required for the endocytosis of Dip5p; may regulate endocytosis of plasma membrane proteins by recruiting ubiquitin ligase Rsp5p to plasma membrane targets; ALY1 has a paralog, ALY2, that arose from the whole genome duplication	915	102518	YKR021W	chr11	487234	.	TA	GA,TG	1301.38	PASS	AF=0.0235294,0.976471;AO=2,76;DP=88;FAO=2,83;FDP=85;FR=.;FRO=0;FSAF=0,43;FSAR=2,40;FSRF=0;FSRR=0;FWDB=0.0158601,0.0144554;FXX=0.034087;HRUN=5,4;LEN=1,1;MLLD=179.753,217.66;OALT=G,G;OID=.,.;OMAPALT=GA,TG;OPOS=487234,487235;OREF=T,A;QD=61.2414;RBI=0.0163166,0.0174409;REFB=0,0;REVB=-0.00383251,-0.0097584;RO=0;SAF=0,41;SAR=2,35;SRF=0;SRR=0;SSEN=0,0;SSEP=0,0;SSSB=0,0;STB=0.5,0.5;STBP=1,1;TYPE=snp,snp;…	GT:GQ:DP:FDP:RO:FRO:AO:FAO:AF:SAR:SAF:SRF:SRR:FSAR:FSAF:FSRF:FSRR	1/2:4:88:85:0:0:2,76:2,83:0.0235294,0.976471:2,35:0,41:0:0:2,40:0,43:0:0
S000005419	YOL058W	ARG1	ARGinine requiring	ARG10 argininosuccinate synthase	Arginosuccinate synthetase	Arginosuccinate synthetase; catalyzes the formation of L-argininosuccinate from citrulline and L-aspartate in the arginine biosynthesis pathway; potential Cdc28p substrate	420	46922.1	YOL058W	chr15	222223	.	A	AC,C	1377.96	PASS	AF=0.979167,0.0208333;AO=92,2;DP=97;FAO=94,2;FDP=96;FR=.;FRO=0;FSAF=55,1;FSAR=39,1;FSRF=0;FSRR=0;FWDB=-0.00972316,0.00565336;FXX=0;HRUN=3,1;LEN=1,1;MLLD=24.3777,321.642;OALT=C,C;OID=.,.;OMAPALT=AC,C;OPOS=222224,222223;OREF=-,A;QD=57.415;RBI=0.0724662,0.00604467;REFB=0,0;REVB=0.0718109,-0.00213951;RO=3;SAF=54,1;SAR=38,1;SRF=1;SRR=2;SSEN=0,0;SSEP=0,0;SSSB=0.0155987,0.142842;STB=0.5,0.5;STBP=1,1;TYP…	GT:GQ:DP:FDP:RO:FRO:AO:FAO:AF:SAR:SAF:SRF:SRR:FSAR:FSAF:FSRF:FSRR	1/2:3:97:96:3:0:92,2:94,2:0.979167,0.0208333:38,1:54,1:1:2:39,1:55,1:0:0
S000004109	YLR119W	SRN2	Suppressor of Rna mutations, Number 2	VPL16 ESCRT-I subunit protein SRN2 VPS37 SRN10	Component of the ESCRT-I complex	Component of the ESCRT-I complex; ESCRT-I is involved in ubiquitin-dependent sorting of proteins into the endosome; suppressor of rna1-1 mutation; may be involved in RNA export from nucleus	213	25106	YLR119W	chr12	386480	.	G	GA,GAA,GAAA	516.435	PASS	AF=0,1,0;AO=4,29,2;DP=37;FAO=0,35,0;FDP=35;FR=.;FRO=0;FSAF=0,19,0;FSAR=0,16,0;FSRF=0;FSRR=0;FWDB=0.0495152,0.0273504,0.0195034;FXX=0.0277701;HRUN=3,3,3;LEN=1,2,3;MLLD=19.2087,33.1746,20.2148;OALT=A,AA,AAA;OID=.,.,.;OMAPALT=GA,GAA,GAAA;OPOS=386481,386481,386481;OREF=-,-,-;QD=59.0211;RBI=0.0998537,0.0513048,0.0346093;REFB=0,0,0;REVB=-0.0867122,-0.0434066,-0.0285905;RO=2;SAF=4,14,1;SAR=0,15,1;SRF=1;…	GT:GQ:DP:FDP:RO:FRO:AO:FAO:AF:SAR:SAF:SRF:SRR:FSAR:FSAF:FSRF:FSRR	2/2:4:37:35:2:0:4,29,2:0,35,0:0,1,0:0,15,1:4,14,1:1:1:0,16,0:0,19,0:0:0
S000003665	YJL129C	TRK1	TRansport of potassium (K)	None	Component of the Trk1p-Trk2p potassium transport system	Component of the Trk1p-Trk2p potassium transport system; 180 kDa high affinity potassium transporter; phosphorylated in vivo and interacts physically with the phosphatase Ppz1p, suggesting Trk1p acitivy is regulated by phosphorylation; TRK1 has a paralog, TRK2, that arose from the whole genome duplication	1235	141084	YJL129C	chr10	177635	.	G	C,GC	902.221	PASS	AF=0,1;AO=2,61;DP=64;FAO=0,62;FDP=62;FR=.;FRO=0;FSAF=0,32;FSAR=0,30;FSRF=0;FSRR=0;FWDB=-0.00918314,0.000497058;FXX=0.0312451;HRUN=1,0;LEN=1,1;MLLD=53.3196,185.876;OALT=C,C;OID=.,.;OMAPALT=C,GC;OPOS=177635,177636;OREF=G,-;QD=58.2078;RBI=0.0302655,0.0168611;REFB=0,0;REVB=0.0288387,0.0168538;RO=0;SAF=0,32;SAR=2,29;SRF=0;SRR=0;SSEN=0,0;SSEP=0,0;SSSB=0,0;STB=0.5,0.5;STBP=1,1;TYPE=snp,ins;VARB=0,-0.000…	GT:GQ:DP:FDP:RO:FRO:AO:FAO:AF:SAR:SAF:SRF:SRR:FSAR:FSAF:FSRF:FSRR	2/2:5:64:62:0:0:2,61:0,62:0,1:2,29:0,32:0:0:0,30:0,32:0:0
S000003398	YGR166W	TRS65	TRapp Subunit	KRE11	Component of transport protein particle (TRAPP) complex II	Component of transport protein particle (TRAPP) complex II; TRAPPII is a multimeric guanine nucleotide-exchange factor for the GTPase Ypt1p, regulating intra-Golgi and endosome-Golgi traffic; role in cell wall beta-glucan biosynthesis and the stress response	560	63377.5	YGR166W	chr07	842714	.	T	TC	806.874	PASS	AF=1;AO=3;DP=78;FAO=77;FDP=77;FR=.;FRO=0;FSAF=46;FSAR=31;FSRF=0;FSRR=0;FWDB=0.0904533;FXX=0;HRUN=4;LEN=1;MLLD=14.7749;OALT=C;OID=.;OMAPALT=TC;OPOS=842715;OREF=-;QD=41.9156;RBI=0.185668;REFB=0;REVB=-0.162144;RO=75;SAF=0;SAR=3;SRF=47;SRR=28;SSEN=0;SSEP=0;SSSB=-0.464385;STB=0.5;STBP=1;TYPE=ins;VARB=0.00127595;ANN=TC|frameshift_variant|HIGH|YGR166W|YGR166W|transcript|TRANSCRIPT_YGR166W|protein_coding…	GT:GQ:DP:FDP:RO:FRO:AO:FAO:AF:SAR:SAF:SRF:SRR:FSAR:FSAF:FSRF:FSRR	1/1:5:78:77:75:0:3:77:1:3:0:47:28:31:46:0:0
S000003398	YGR166W	TRS65	TRapp Subunit	KRE11	Component of transport protein particle (TRAPP) complex II	Component of transport protein particle (TRAPP) complex II; TRAPPII is a multimeric guanine nucleotide-exchange factor for the GTPase Ypt1p, regulating intra-Golgi and endosome-Golgi traffic; role in cell wall beta-glucan biosynthesis and the stress response	560	63377.5	YGR166W	chr07	842846	.	CG	TA,TG	838.504	PASS	AF=0.0338983,0.966102;AO=2,57;DP=59;FAO=2,57;FDP=59;FR=.;FRO=0;FSAF=0,27;FSAR=2,30;FSRF=0;FSRR=0;FWDB=-0.0232935,-0.0406838;FXX=0;HRUN=1,1;LEN=2,1;MLLD=144.914,77.3697;OALT=TA,T;OID=.,.;OMAPALT=TA,TG;OPOS=842846,842846;OREF=CG,C;QD=56.8477;RBI=0.0240704,0.0564192;REFB=0,0;REVB=-0.00606576,-0.0390891;RO=0;SAF=0,27;SAR=2,30;SRF=0;SRR=0;SSEN=0,0;SSEP=0,0;SSSB=0,0;STB=0.5,0.5;STBP=1,1;TYPE=mnp,snp;VA…	GT:GQ:DP:FDP:RO:FRO:AO:FAO:AF:SAR:SAF:SRF:SRR:FSAR:FSAF:FSRF:FSRR	1/2:7:59:59:0:0:2,57:2,57:0.0338983,0.966102:2,30:0,27:0:0:2,30:0,27:0:0
S000002965	YFL017W-A	SMX2	None	YFL018W-A mRNA splicing protein SMX2 SNP2 Sm G SmG	Core Sm protein Sm G	Core Sm protein Sm G; part of heteroheptameric complex (with Smb1p, Smd1p, Smd2p, Smd3p, Sme1p, and Smx3p) that is part of the spliceosomal U1, U2, U4, and U5 snRNPs; homolog of human Sm G	77	8479.9	YFL017W-A	chr06	106210	.	T	TC	606.462	PASS	AF=1;AO=2;DP=50;FAO=49;FDP=49;FR=.;FRO=0;FSAF=26;FSAR=23;FSRF=0;FSRR=0;FWDB=0.154665;FXX=0.019996;HRUN=0;LEN=1;MLLD=88.3344;OALT=C;OID=.;OMAPALT=TC;OPOS=106211;OREF=-;QD=49.5071;RBI=0.15472;REFB=0;REVB=0.00415924;RO=48;SAF=0;SAR=2;SRF=26;SRR=22;SSEN=0;SSEP=0;SSSB=-0.404252;STB=0.5;STBP=1;TYPE=ins;VARB=0.00802148;ANN=TC|frameshift_variant|HIGH|YFL017W-A|YFL017W-A|transcript|TRANSCRIPT_YFL017W-A|pr…	GT:GQ:DP:FDP:RO:FRO:AO:FAO:AF:SAR:SAF:SRF:SRR:FSAR:FSAF:FSRF:FSRR	1/1:4:50:49:48:0:2:49:1:2:0:26:22:23:26:0:0
S000000290	YBR086C	IST2	Increased Sodium Tolerance	None	Cortical ER protein involved in ER-plasma membrane tethering	Cortical ER protein involved in ER-plasma membrane tethering; one of 6 proteins (Ist2p, Scs2p, Scs22p, Tcb1p, Tcb2p, Tcb3p) that connect ER to the plasma membrane (PM) and regulate PM phosphatidylinositol-4-phosphate (PI4P) levels by controlling access of Sac1p phosphatase to its substrate PI4P in the PM; localizes to the mother cell in small-budded cells and to the bud in medium- and large-budde…	946	105872	YBR086C	chr02	422517	.	CTTTTTTTT	CTTTTTTCT,CTTTTTT,CTTTTTTT,CTTTTTTTG	269.309	PASS	AF=0.016129,0.0322581,0.919355,0.0322581;AO=2,9,23,2;DP=64;FAO=1,2,57,2;FDP=62;FR=.;FRO=0;FSAF=1,0,34,1;FSAR=0,2,23,1;FSRF=0;FSRR=0;FWDB=-0.0262982,0.0735605,0.142772,0.0581612;FXX=0.0605969;HRUN=8,8,8,8;LEN=1,2,1,1;MLLD=173.31,10.3944,7.06711,21.0712;OALT=C,-,-,G;OID=.,.,.,.;OMAPALT=CTTTTTTCT,CTTTTTT,CTTTTTTT,CTTTTTTTG;OPOS=422524,422518,422518,422525;OREF=T,TT,T,T;QD=17.3748;RBI=0.0268346,0.106…	GT:GQ:DP:FDP:RO:FRO:AO:FAO:AF:SAR:SAF:SRF:SRR:FSAR:FSAF:FSRF:FSRR	3/4:7:64:62:22:0:2,9,23,2:1,2,57,2:0.016129,0.0322581,0.919355,0.0322581:0,4,13,1:2,5,10,1:15:7:0,2,23,1:1,0,34,1:0:0
S000001162	YHR120W	MSH1	MutS Homolog	mismatch repair ATPase MSH1	DNA-binding protein of the mitochondria	DNA-binding protein of the mitochondria; involved in repair of mitochondrial DNA; has ATPase activity and binds to DNA mismatches; has homology to E. coli MutS; transcription is induced during meiosis	959	109425	YHR120W	chr08	345360	.	AATTTTTTA	AATTTTA,AATTTTTA,AATTTTTAT,AATTTTTTAT,ATTTTA,ATTTTTA	300.866	PASS	AF=0.0545455,0.927273,0,0,0.0181818,0;AO=4,19,3,3,9,6;DP=61;FAO=3,51,0,0,1,0;FDP=55;FR=.;FRO=0;FSAF=2,26,0,0,1,0;FSAR=1,25,0,0,0,0;FSRF=0;FSRR=0;FWDB=0.0874082,0.168045,-0.156528,-0.436689,0.040138,0.00711763;FXX=0.0833194;HRUN=6,6,6,1,6,6;LEN=2,1,2,1,3,2;MLLD=11.4829,8.42887,12.8776,15.9667,13.6775,8.18849;OALT=-,-,AT,T,-,-;OID=.,.,.,.,.,.;OMAPALT=AATTTTA,AATTTTTA,AATTTTTAT,AATTTTTTAT,ATTTTA,ATT…	GT:GQ:DP:FDP:RO:FRO:AO:FAO:AF:SAR:SAF:SRF:SRR:FSAR:FSAF:FSRF:FSRR	1/2:12:61:55:11:0:4,19,3,3,9,6:3,51,0,0,1,0:0.0545455,0.927273,0,0,0.0181818,0:3,13,0,0,1,3:1,6,3,3,8,3:5:6:1,25,0,0,0,0:2,26,0,0,1,0:0:0
S000004526	YML061C	PIF1	Petite Integration Frequency	TST1 DNA helicase PIF1	DNA helicase, potent G-quadruplex DNA binder/unwinder	DNA helicase, potent G-quadruplex DNA binder/unwinder; possesses strand annealing activity; promotes DNA synthesis during break-induced replication; important for crossover recombination; translation from different start sites produces mitochondrial and nuclear forms; nuclear form is a catalytic inhibitor of telomerase; mitochondrial form involved in DNA repair and recombination; mutations affect…	859	97697.2	YML061C	chr13	154783	.	A	AAT,AT	702.847	PASS	AF=0,1;AO=2,48;DP=53;FAO=0,50;FDP=50;FR=.;FRO=0;FSAF=0,29;FSAR=0,21;FSRF=0;FSRR=0;FWDB=0.0268847,-0.0083713;FXX=0.019604;HRUN=2,1;LEN=2,1;MLLD=4.78873,29.6291;OALT=AT,T;OID=.,.;OMAPALT=AAT,AT;OPOS=154784,154784;OREF=-,-;QD=56.2278;RBI=0.0322974,0.0717382;REFB=0,0;REVB=-0.017898,-0.0712481;RO=3;SAF=0,29;SAR=2,19;SRF=1;SRR=2;SSEN=0,0;SSEP=0,0;SSSB=-0.599865,0.0310512;STB=0.5,0.5;STBP=1,1;TYPE=ins,i…	GT:GQ:DP:FDP:RO:FRO:AO:FAO:AF:SAR:SAF:SRF:SRR:FSAR:FSAF:FSRF:FSRR	2/2:4:53:50:3:0:2,48:0,50:0,1:2,19:0,29:1:2:0,21:0,29:0:0
S000001260	YHR217C	None	None	None	Dubious open reading frame	Dubious open reading frame; unlikely to encode a functional protein, based on available experimental and comparative sequence data; located in the telomeric region TEL08R	153	17082.8	YHR217C	chr08	555107	.	AT	A	400.661	PASS	AF=1;AO=27;DP=29;FAO=29;FDP=29;FR=.;FRO=0;FSAF=11;FSAR=18;FSRF=0;FSRR=0;FWDB=-0.00560576;FXX=0;HRUN=1;LEN=1;MLLD=268.72;OALT=-;OID=.;OMAPALT=A;OPOS=555108;OREF=T;QD=55.2636;RBI=0.016036;REFB=0;REVB=0.0150242;RO=0;SAF=11;SAR=16;SRF=0;SRR=0;SSEN=0;SSEP=0;SSSB=3.5146e-08;STB=0.5;STBP=1;TYPE=del;VARB=0.000136954;ANN=A|frameshift_variant|HIGH|YHR217C|YHR217C|transcript|TRANSCRIPT_YHR217C|protein_codin…	GT:GQ:DP:FDP:RO:FRO:AO:FAO:AF:SAR:SAF:SRF:SRR:FSAR:FSAF:FSRF:FSRR	1/1:4:29:29:0:0:27:29:1:16:11:0:0:18:11:0:0
S000001260	YHR217C	None	None	None	Dubious open reading frame	Dubious open reading frame; unlikely to encode a functional protein, based on available experimental and comparative sequence data; located in the telomeric region TEL08R	153	17082.8	YHR217C	chr08	555113	.	TG	T	378.585	PASS	AF=1;AO=27;DP=28;FAO=28;FDP=28;FR=.;FRO=0;FSAF=11;FSAR=17;FSRF=0;FSRR=0;FWDB=-0.0249718;FXX=0;HRUN=2;LEN=1;MLLD=29.4358;OALT=-;OID=.;OMAPALT=T;OPOS=555114;OREF=G;QD=54.0835;RBI=0.0809347;REFB=0;REVB=-0.0769859;RO=0;SAF=11;SAR=16;SRF=0;SRR=0;SSEN=0;SSEP=0;SSSB=3.5146e-08;STB=0.5;STBP=1;TYPE=del;VARB=-0.00494286;ANN=T|frameshift_variant|HIGH|YHR217C|YHR217C|transcript|TRANSCRIPT_YHR217C|protein_cod…	GT:GQ:DP:FDP:RO:FRO:AO:FAO:AF:SAR:SAF:SRF:SRR:FSAR:FSAF:FSRF:FSRR	1/1:4:28:28:0:0:27:28:1:16:11:0:0:17:11:0:0
S000007240	YGR122C-A	None	None	None	Dubious open reading frame	Dubious open reading frame; unlikely to encode a functional protein, based on available experimental and comparative sequence data; similar to YLR334C and YOL106W	42	4633.3	YGR122C-A	chr07	744236	.	T	C	613.364	PASS	AF=1;AO=40;DP=40;FAO=40;FDP=40;FR=.;FRO=0;FSAF=21;FSAR=19;FSRF=0;FSRR=0;FWDB=0.012065;FXX=0;HRUN=1;LEN=1;MLLD=142.499;OALT=C;OID=.;OMAPALT=C;OPOS=744236;OREF=T;QD=61.3364;RBI=0.0143032;REFB=0;REVB=-0.00768237;RO=0;SAF=21;SAR=19;SRF=0;SRR=0;SSEN=0;SSEP=0;SSSB=-3.17587e-08;STB=0.5;STBP=1;TYPE=snp;VARB=2.24549e-05;ANN=C|missense_variant|MODERATE|YGR122C-A|YGR122C-A|transcript|TRANSCRIPT_YGR122C-A|pr…	GT:GQ:DP:FDP:RO:FRO:AO:FAO:AF:SAR:SAF:SRF:SRR:FSAR:FSAF:FSRF:FSRR	1/1:4:40:40:0:0:40:40:1:19:21:0:0:19:21:0:0
S000007240	YGR122C-A	None	None	None	Dubious open reading frame	Dubious open reading frame; unlikely to encode a functional protein, based on available experimental and comparative sequence data; similar to YLR334C and YOL106W	42	4633.3	YGR122C-A	chr07	744246	.	A	T	612.742	PASS	AF=1;AO=39;DP=39;FAO=40;FDP=40;FR=.;FRO=0;FSAF=21;FSAR=19;FSRF=0;FSRR=0;FWDB=0.0369975;FXX=0;HRUN=1;LEN=1;MLLD=100.818;OALT=T;OID=.;OMAPALT=T;OPOS=744246;OREF=A;QD=61.2742;RBI=0.0528578;REFB=0;REVB=0.037751;RO=0;SAF=20;SAR=19;SRF=0;SRR=0;SSEN=0;SSEP=0;SSSB=3.3303e-08;STB=0.5;STBP=1;TYPE=snp;VARB=0.000839789;ANN=T|stop_gained|HIGH|YGR122C-A|YGR122C-A|transcript|TRANSCRIPT_YGR122C-A|protein_coding|…	GT:GQ:DP:FDP:RO:FRO:AO:FAO:AF:SAR:SAF:SRF:SRR:FSAR:FSAF:FSRF:FSRR	1/1:4:39:40:0:0:39:40:1:19:20:0:0:19:21:0:0
S000007240	YGR122C-A	None	None	None	Dubious open reading frame	Dubious open reading frame; unlikely to encode a functional protein, based on available experimental and comparative sequence data; similar to YLR334C and YOL106W	42	4633.3	YGR122C-A	chr07	744250	.	A	G	610.267	PASS	AF=1;AO=37;DP=40;FAO=40;FDP=40;FR=.,HEALED;FRO=0;FSAF=21;FSAR=19;FSRF=0;FSRR=0;FWDB=-0.00134102;FXX=0;HRUN=1;LEN=1;MLLD=362.937;OALT=G;OID=.;OMAPALT=G;OPOS=744250;OREF=A;QD=61.0267;RBI=0.0187272;REFB=0;REVB=0.0186792;RO=0;SAF=19;SAR=18;SRF=0;SRR=0;SSEN=0;SSEP=0;SSSB=-3.68991e-08;STB=0.5;STBP=1;TYPE=snp;VARB=0.000107942;ANN=G|missense_variant|MODERATE|YGR122C-A|YGR122C-A|transcript|TRANSCRIPT_YGR1…	GT:GQ:DP:FDP:RO:FRO:AO:FAO:AF:SAR:SAF:SRF:SRR:FSAR:FSAF:FSRF:FSRR	1/1:4:40:40:0:0:37:40:1:18:19:0:0:19:21:0:0
S000003576	YJL039C	NUP192	NUclear Pore	None	Essential subunit of inner ring of nuclear pore complex (NPC)	Essential subunit of inner ring of nuclear pore complex (NPC); plays a role in modulating transport through the NPC; homologous to human NUP205	1683	191493	YJL039C	chr10	383382	.	TAAAAAAATC	TAAAAAATC,TAAAAAATCT,TAAAAATC	293.583	PASS	AF=1,0,0;AO=25,2,4;DP=39;FAO=35,0,0;FDP=35;FR=.;FRO=0;FSAF=7,0,0;FSAR=28,0,0;FSRF=0;FSRR=0;FWDB=-0.0323487,-0.117271,-0.0130063;FXX=0.0540395;HRUN=7,7,7;LEN=1,3,2;MLLD=11.0541,221.016,9.1658;OALT=-,TCT,-;OID=.,.,.;OMAPALT=TAAAAAATC,TAAAAAATCT,TAAAAATC;OPOS=383383,383389,383383;OREF=A,ATC,AA;QD=33.5523;RBI=0.108697,0.117629,0.0554389;REFB=0,0,0;REVB=-0.103772,-0.00916956,-0.0538916;RO=4;SAF=2,2,0;…	GT:GQ:DP:FDP:RO:FRO:AO:FAO:AF:SAR:SAF:SRF:SRR:FSAR:FSAF:FSRF:FSRR	0/1:3:39:35:4:0:25,2,4:35,0,0:1,0,0:23,0,4:2,2,0:3:1:28,0,0:7,0,0:0:0
S000003351	YGR119C	NUP57	NUclear Pore	FG-nucleoporin NUP57	FG-nucleoporin component of central core of the nuclear pore complex	FG-nucleoporin component of central core of the nuclear pore complex; contributes directly to nucleocytoplasmic transport and maintenance of the nuclear pore complex (NPC) permeability barrier; found in stable complex with Nic96p and two other FG-nucleoproteins (Nsp1p and Nup49p)	541	57512.4	YGR119C	chr07	736949	.	T	TTGC	728.764	PASS	AF=1;AO=50;DP=54;FAO=51;FDP=51;FR=.;FRO=0;FSAF=25;FSAR=26;FSRF=0;FSRR=0;FWDB=0.0625869;FXX=0;HRUN=3;LEN=3;MLLD=287.988;OALT=TGC;OID=.;OMAPALT=TTGC;OPOS=736950;OREF=-;QD=57.1579;RBI=0.0674957;REFB=0;REVB=0.0252695;RO=3;SAF=25;SAR=25;SRF=3;SRR=0;SSEN=0;SSEP=0;SSSB=-0.0532012;STB=0.5;STBP=1;TYPE=ins;VARB=0.000151877;ANN=TTGC|disruptive_inframe_insertion|MODERATE|YGR119C|YGR119C|transcript|TRANSCRIPT…	GT:GQ:DP:FDP:RO:FRO:AO:FAO:AF:SAR:SAF:SRF:SRR:FSAR:FSAF:FSRF:FSRR	1/1:4:54:51:3:0:50:51:1:25:25:3:0:26:25:0:0
S000005441	YOL081W	IRA2	Inhibitory Regulator of the RAS-cAMP pathway	CCS1 GLC4 Ras GTPase activating protein IRA2	GTPase-activating protein	GTPase-activating protein; negatively regulates RAS by converting it from the GTP- to the GDP-bound inactive form, required for reducing cAMP levels under nutrient limiting conditions; IRA2 has a paralog, IRA1, that arose from the whole genome duplication; defects in human homolog NF1 are associated with neurofibromatosis	3079	351651	YOL081W	chr15	180646	.	CAAAAAAT	ACAAAAAT,CAAAAAT,CAAAAATA,CAAAAT	277.575	PASS	AF=0,0.90566,0,0;AO=3,24,2,2;DP=46;FAO=0,48,0,0;FDP=53;FR=.;FRO=5;FSAF=0,25,0,0;FSAR=0,23,0,0;FSRF=3;FSRR=2;FWDB=0.00722569,0.106963,0.0024655,0.0550202;FXX=0;HRUN=1,6,6,6;LEN=2,1,2,2;MLLD=127.228,10.21,12.2228,10.6584;OALT=AC,-,TA,-;OID=.,.,.,.;OMAPALT=ACAAAAAT,CAAAAAT,CAAAAATA,CAAAAT;OPOS=180646,180647,180652,180647;OREF=CA,A,AT,AA;QD=20.9491;RBI=0.164925,0.107744,0.0349255,0.0554142;REFB=-0.02…	GT:GQ:DP:FDP:RO:FRO:AO:FAO:AF:SAR:SAF:SRF:SRR:FSAR:FSAF:FSRF:FSRR	0/2:14:46:53:14:5:3,24,2,2:0,48,0,0:0,0.90566,0,0:3,8,2,0:0,16,0,2:10:4:0,23,0,0:0,25,0,0:3:2
S000004871	YMR258C	ROY1	Repressor Of Ypt52	None	GTPase inhibitor with similarity to F-box proteins	GTPase inhibitor with similarity to F-box proteins; inhibits Ypt52p GTPase activity by preventing Ypt52p from binding GTP; involved in regulating intracellular trafficking; physically interacts with Skp1p	553	64396.5	YMR258C	chr13	792199	.	G	GC	1301.32	PASS	AF=1;AO=6;DP=93;FAO=89;FDP=89;FR=.;FRO=0;FSAF=46;FSAR=43;FSRF=0;FSRR=0;FWDB=0.0457586;FXX=0.0326052;HRUN=0;LEN=1;MLLD=213.113;OALT=C;OID=.;OMAPALT=GC;OPOS=792200;OREF=-;QD=58.4862;RBI=0.0469817;REFB=0;REVB=-0.0106505;RO=84;SAF=1;SAR=5;SRF=43;SRR=41;SSEN=0;SSEP=0;SSSB=-0.357703;STB=0.5;STBP=1;TYPE=ins;VARB=0.00214418;ANN=GC|frameshift_variant|HIGH|YMR258C|YMR258C|transcript|TRANSCRIPT_YMR258C|prot…	GT:GQ:DP:FDP:RO:FRO:AO:FAO:AF:SAR:SAF:SRF:SRR:FSAR:FSAF:FSRF:FSRR	1/1:7:93:89:84:0:6:89:1:5:1:43:41:43:46:0:0
S000004906	YMR292W	GOT1	GOlgi Transport	None	Homodimeric protein that is packaged into COPII vesicles	Homodimeric protein that is packaged into COPII vesicles; cycles between the ER and Golgi; involved in secretory transport but not directly required for aspects of transport assayed in vitro; may influence membrane composition	138	15436.8	YMR292W	chr13	863454	.	T	TG	878.865	PASS	AF=1;AO=4;DP=67;FAO=64;FDP=64;FR=.;FRO=0;FSAF=36;FSAR=28;FSRF=0;FSRR=0;FWDB=0.0673896;FXX=0.0153822;HRUN=0;LEN=1;MLLD=286.975;OALT=G;OID=.;OMAPALT=TG;OPOS=863455;OREF=-;QD=54.9291;RBI=0.0995654;REFB=0;REVB=-0.0732933;RO=63;SAF=1;SAR=3;SRF=36;SRR=27;SSEN=0;SSEP=0;SSSB=-0.301597;STB=0.5;STBP=1;TYPE=ins;VARB=0.0023423;ANN=TG|frameshift_variant|HIGH|YMR292W|YMR292W|transcript|TRANSCRIPT_YMR292W|prote…	GT:GQ:DP:FDP:RO:FRO:AO:FAO:AF:SAR:SAF:SRF:SRR:FSAR:FSAF:FSRF:FSRR	1/1:5:67:64:63:0:4:64:1:3:1:36:27:28:36:0:0
S000006046	YPL125W	KAP120	KAryoPherin	LPH2	Karyopherin responsible for the nuclear import of Rpf1p	Karyopherin responsible for the nuclear import of Rpf1p; Rpf1p is a ribosome maturation factor	1032	119592	YPL125W	chr16	313742	.	TG	GA,TGA	931.979	PASS	AF=0.0153846,0.984615;AO=2,62;DP=71;FAO=1,64;FDP=65;FR=.;FRO=0;FSAF=1,24;FSAR=0,40;FSRF=0;FSRR=0;FWDB=0.0624014,0.12897;FXX=0;HRUN=2,1;LEN=2,1;MLLD=6.25418,30.925;OALT=GA,A;OID=.,.;OMAPALT=GA,TGA;OPOS=313742,313744;OREF=TG,-;QD=57.3526;RBI=0.064861,0.137366;REFB=0,0;REVB=0.0176924,0.0472884;RO=6;SAF=1,24;SAR=1,38;SRF=1;SRR=5;SSEN=0,0;SSEP=0,0;SSSB=0.359974,0.0389516;STB=0.5,0.5;STBP=1,1;TYPE=mnp,…	GT:GQ:DP:FDP:RO:FRO:AO:FAO:AF:SAR:SAF:SRF:SRR:FSAR:FSAF:FSRF:FSRR	1/2:4:71:65:6:0:2,62:1,64:0.0153846,0.984615:1,38:1,24:1:5:0,40:1,24:0:0
S000005721	YOR195W	SLK19	Synthetic Lethal Kar3p	None	Kinetochore-associated protein	Kinetochore-associated protein; required for chromosome segregation and kinetochore clustering; required for normal segregation of chromosomes in meiosis and mitosis; component of the FEAR regulatory network, which promotes Cdc14p release from the nucleolus during anaphase; potential Cdc28p substrate	821	95325.1	YOR195W	chr15	709674	.	T	TA	833.524	PASS	AF=1;AO=58;DP=61;FAO=58;FDP=58;FR=.;FRO=0;FSAF=32;FSAR=26;FSRF=0;FSRR=0;FWDB=0.00827203;FXX=0;HRUN=0;LEN=1;MLLD=286.986;OALT=A;OID=.;OMAPALT=TA;OPOS=709675;OREF=-;QD=57.4844;RBI=0.0169946;REFB=0;REVB=-0.0148456;RO=3;SAF=32;SAR=26;SRF=1;SRR=2;SSEN=0;SSEP=0;SSSB=0.0204047;STB=0.5;STBP=1;TYPE=ins;VARB=-1.0003e-05;ANN=TA|frameshift_variant|HIGH|YOR195W|YOR195W|transcript|TRANSCRIPT_YOR195W|protein_co…	GT:GQ:DP:FDP:RO:FRO:AO:FAO:AF:SAR:SAF:SRF:SRR:FSAR:FSAF:FSRF:FSRR	1/1:5:61:58:3:0:58:58:1:26:32:1:2:26:32:0:0
S000000084	YAR050W	FLO1	FLOcculation	flocculin FLO1 FLO2 FLO4	Lectin-like protein involved in flocculation	Lectin-like protein involved in flocculation; cell wall protein that binds mannose chains on the surface of other cells, confers floc-forming ability that is chymotrypsin sensitive and heat resistant; important for co-flocculation with other yeasts, mediating interaction with specific species; FLO1 has a paralog, FLO5, that arose from a segmental duplication	1537	160585	YAR050W	chr01	223976	.	CT	AC,AT	1093.08	PASS	AF=0.0405405,0.959459;AO=3,69;DP=74;FAO=3,71;FDP=74;FR=.;FRO=0;FSAF=3,33;FSAR=0,38;FSRF=0;FSRR=0;FWDB=0.00260138,0.00459034;FXX=0;HRUN=2,2;LEN=2,1;MLLD=174.956,152.943;OALT=AC,A;OID=.,.;OMAPALT=AC,AT;OPOS=223976,223976;OREF=CT,C;QD=59.0853;RBI=0.0216907,0.00642912;REFB=0,0;REVB=-0.0215342,0.00450136;RO=0;SAF=3,31;SAR=0,38;SRF=0;SRR=0;SSEN=0,0;SSEP=0,0;SSSB=0,0;STB=0.5,0.5;STBP=1,1;TYPE=mnp,snp;VA…	GT:GQ:DP:FDP:RO:FRO:AO:FAO:AF:SAR:SAF:SRF:SRR:FSAR:FSAF:FSRF:FSRR	1/2:9:74:74:0:0:3,69:3,71:0.0405405,0.959459:0,38:3,31:0:0:0,38:3,33:0:0
S000000249	YBR045C	GIP1	Glc7-Interacting Protein	protein phosphatase regulator GIP1	Meiosis-specific regulatory subunit of the Glc7p protein phosphatase	Meiosis-specific regulatory subunit of the Glc7p protein phosphatase; regulates spore wall formation and septin organization, required for expression of some late meiotic genes and for normal localization of Glc7p	639	73327.2	YBR045C	chr02	328479	.	A	AT,T	541.673	PASS	AF=0.942308,0.0384615;AO=43,2;DP=52;FAO=49,2;FDP=52;FR=.;FRO=1;FSAF=24,2;FSAR=25,0;FSRF=1;FSRR=0;FWDB=0.0593538,-0.0124882;FXX=0;HRUN=3,2;LEN=1,1;MLLD=16.2931,24.9102;OALT=T,T;OID=.,.;OMAPALT=AT,T;OPOS=328480,328479;OREF=-,A;QD=41.6671;RBI=0.101021,0.0386006;REFB=-0.0226103,0.0158814;REVB=0.0817459,0.0365247;RO=7;SAF=22,2;SAR=21,0;SRF=3;SRR=4;SSEN=0,0;SSEP=0,0;SSSB=0.021706,0.621371;STB=0.5102,0.…	GT:GQ:DP:FDP:RO:FRO:AO:FAO:AF:SAR:SAF:SRF:SRR:FSAR:FSAF:FSRF:FSRR	1/2:8:52:52:7:1:43,2:49,2:0.942308,0.0384615:21,0:22,2:3:4:25,0:24,2:1:0
S000003578	YJL042W	MHP1	MAP-Homologous Protein	None	Microtubule-associated protein involved in microtubule organization	Microtubule-associated protein involved in microtubule organization; involved in assembly and stabilization of microtubules; overproduction results in cell cycle arrest at G2 phase; similar to Drosophila protein MAP and to mammalian MAP4 proteins	1398	155204	YJL042W	chr10	375457	.	AG	A,AA,GA	963.681	PASS	AF=0,0.940299,0.0597015;AO=7,56,4;DP=67;FAO=0,63,4;FDP=67;FR=.;FRO=0;FSAF=0,28,0;FSAR=0,35,4;FSRF=0;FSRR=0;FWDB=0.0409757,0.035732,-0.0910867;FXX=0;HRUN=1,1,2;LEN=1,1,2;MLLD=356.057,371.704,25.9596;OALT=-,A,GA;OID=.,.,.;OMAPALT=A,AA,GA;OPOS=375458,375458,375457;OREF=G,G,AG;QD=57.5332;RBI=0.0412413,0.0361299,0.103744;REFB=0,0,0;REVB=0.00467322,0.00534728,-0.0496593;RO=0;SAF=4,24,0;SAR=3,32,4;SRF=0…	GT:GQ:DP:FDP:RO:FRO:AO:FAO:AF:SAR:SAF:SRF:SRR:FSAR:FSAF:FSRF:FSRR	2/3:14:67:67:0:0:7,56,4:0,63,4:0,0.940299,0.0597015:3,32,4:4,24,0:0:0:0,35,4:0,28,0:0:0
S000000280	YBR076W	ECM8	ExtraCellular Mutant	None	Non-essential protein of unknown function	Non-essential protein of unknown function	354	41783.1	YBR076W	chr02	390540	.	TG	T,TT	732.872	PASS	AF=0.962264,0.0377358;AO=48,3;DP=53;FAO=51,2;FDP=53;FR=.;FRO=0;FSAF=26,2;FSAR=25,0;FSRF=0;FSRR=0;FWDB=-0.00295768,-0.0116701;FXX=0;HRUN=1,1;LEN=1,1;MLLD=107.708,83.9726;OALT=-,T;OID=.,.;OMAPALT=T,TT;OPOS=390541,390541;OREF=G,G;QD=55.3111;RBI=0.00332352,0.0124628;REFB=0,0;REVB=-0.00151588,0.00437369;RO=0;SAF=24,3;SAR=24,0;SRF=0;SRR=0;SSEN=0,0;SSEP=0,0;SSSB=0,0;STB=0.5,0.5;STBP=1,1;TYPE=del,snp;VAR…	GT:GQ:DP:FDP:RO:FRO:AO:FAO:AF:SAR:SAF:SRF:SRR:FSAR:FSAF:FSRF:FSRR	1/2:8:53:53:0:0:48,3:51,2:0.962264,0.0377358:24,0:24,3:0:0:25,0:26,2:0:0
S000001800	YKR092C	SRP40	Serine Rich Protein	None	Nucleolar serine-rich protein	Nucleolar serine-rich protein; role in preribosome assembly or transport; may function as a chaperone of small nucleolar ribonucleoprotein particles (snoRNPs); immunologically and structurally to rat Nopp140	406	40971.7	YKR092C	chr11	622617	.	GAGTCACTGCTGTCACTGC	G	50	PASS	AF=0.982456;AO=56;DP=57;FR=.;LEN=18;OALT=-;OID=.;OMAPALT=G;OPOS=622618;OREF=AGTCACTGCTGTCACTGC;RO=1;SAF=19;SAR=37;SRF=0;SRR=2;TYPE=del;ANN=G|disruptive_inframe_deletion|MODERATE|YKR092C|YKR092C|transcript|TRANSCRIPT_YKR092C|protein_coding|1/1|c.197_214delGCAGTGACAGCAGTGACT|p.Cys66_Asp71del|214/1221|197/1221|66/406||	GT:GQ:DP:RO:AO:SAF:SAR:SRF:SRR:AF	1/1:99:57:1:56:19:37:0:2:0.982456
S000001800	YKR092C	SRP40	Serine Rich Protein	None	Nucleolar serine-rich protein	Nucleolar serine-rich protein; role in preribosome assembly or transport; may function as a chaperone of small nucleolar ribonucleoprotein particles (snoRNPs); immunologically and structurally to rat Nopp140	406	40971.7	YKR092C	chr11	622631	.	ACTGCAGTCACTGCTGTCACTGCTG	A	632.26	PASS	AF=1;AO=41;DP=41;FAO=41;FDP=41;FR=.;FRO=0;FSAF=9;FSAR=32;FSRF=0;FSRR=0;FWDB=0.0455154;FXX=0;HRUN=1;LEN=24;MLLD=880.396;OALT=-;OID=.;OMAPALT=A;OPOS=622632;OREF=CTGCAGTCACTGCTGTCACTGCTG;QD=61.6839;RBI=0.0640755;REFB=0;REVB=0.0451001;RO=0;SAF=9;SAR=32;SRF=0;SRR=0;SSEN=0;SSEP=0;SSSB=-4.40541e-08;STB=0.5;STBP=1;TYPE=del;VARB=0.000158222;ANN=A|disruptive_inframe_deletion|MODERATE|YKR092C|YKR092C|transc…	GT:GQ:DP:FDP:RO:FRO:AO:FAO:AF:SAR:SAF:SRF:SRR:FSAR:FSAF:FSRF:FSRR	1/1:4:41:41:0:0:41:41:1:32:9:0:0:32:9:0:0
S000005875	YOR348C	PUT4	Proline UTilization	proline permease PUT4	Proline permease	Proline permease; required for high-affinity transport of proline; also transports the toxic proline analog azetidine-2-carboxylate (AzC); PUT4 transcription is repressed in ammonia-grown cells	627	68789.1	YOR348C	chr15	987144	.	C	A	1138.04	PASS	AF=1;AO=48;DP=75;FAO=75;FDP=75;FR=.,HEALED;FRO=0;FSAF=39;FSAR=36;FSRF=0;FSRR=0;FWDB=0.109974;FXX=0;HRUN=1;LEN=1;MLLD=210.008;OALT=A;OID=.;OMAPALT=A;OPOS=987144;OREF=C;QD=60.6957;RBI=0.111117;REFB=0;REVB=0.0158972;RO=0;SAF=13;SAR=35;SRF=0;SRR=0;SSEN=0;SSEP=0;SSSB=-5.61818e-08;STB=0.5;STBP=1;TYPE=snp;VARB=0.000562476;ANN=A|missense_variant|MODERATE|YOR348C|YOR348C|transcript|TRANSCRIPT_YOR348C|prot…	GT:GQ:DP:FDP:RO:FRO:AO:FAO:AF:SAR:SAF:SRF:SRR:FSAR:FSAF:FSRF:FSRR	1/1:6:75:75:0:0:48:75:1:35:13:0:0:36:39:0:0
S000000248	YBR044C	TCM62	TriCarboxylic acid cycle Mutant	None	Protein involved in assembly of the succinate dehydrogenase complex	Protein involved in assembly of the succinate dehydrogenase complex; mitochondrial; putative chaperone	572	64267.8	YBR044C	chr02	324462	.	C	CT	573.618	PASS	AF=1;AO=49;DP=63;FAO=59;FDP=59;FR=.;FRO=0;FSAF=21;FSAR=38;FSRF=0;FSRR=0;FWDB=0.11784;FXX=0;HRUN=4;LEN=1;MLLD=13.7724;OALT=T;OID=.;OMAPALT=CT;OPOS=324463;OREF=-;QD=38.8894;RBI=0.192703;REFB=-0.00538535;REVB=0.152473;RO=13;SAF=20;SAR=29;SRF=2;SRR=11;SSEN=0;SSEP=0;SSSB=0.105141;STB=0.5;STBP=1;TYPE=ins;VARB=0.00897484;ANN=CT|frameshift_variant|HIGH|YBR044C|YBR044C|transcript|TRANSCRIPT_YBR044C|protei…	GT:GQ:DP:FDP:RO:FRO:AO:FAO:AF:SAR:SAF:SRF:SRR:FSAR:FSAF:FSRF:FSRR	1/1:3:63:59:13:0:49:59:1:29:20:2:11:38:21:0:0
S000000420	YBR216C	YBP1	Yap1-Binding Protein	None	Protein involved in cellular response to oxidative stress	Protein involved in cellular response to oxidative stress; required for oxidation of specific cysteine residues of transcription factor Yap1p, resulting in nuclear localization of Yap1p in response to stress; YBP1 has a paralog, YBP2, that arose from the whole genome duplication	674	77730.1	YBR216C	chr02	663081	.	A	AG,AGG	677.055	PASS	AF=0.985507,0.0144928;AO=62,5;DP=72;FAO=68,1;FDP=69;FR=.;FRO=0;FSAF=37,1;FSAR=31,0;FSRF=0;FSRR=0;FWDB=-0.0406738,-0.0211503;FXX=0;HRUN=5,5;LEN=1,2;MLLD=13.2848,8.92532;OALT=G,GG;OID=.,.;OMAPALT=AG,AGG;OPOS=663082,663082;OREF=-,-;QD=39.2495;RBI=0.124161,0.0635814;REFB=0,0;REVB=-0.11731,-0.0599605;RO=5;SAF=36,2;SAR=26,3;SRF=2;SRR=3;SSEN=0,0;SSEP=0,0;SSSB=0.0259421,0;STB=0.5,0.5;STBP=1,1;TYPE=ins,in…	GT:GQ:DP:FDP:RO:FRO:AO:FAO:AF:SAR:SAF:SRF:SRR:FSAR:FSAF:FSRF:FSRR	1/2:4:72:69:5:0:62,5:68,1:0.985507,0.0144928:26,3:36,2:2:3:31,0:37,1:0:0
S000004428	YLR436C	ECM30	ExtraCellular Mutant	None	Protein of unknown function	Protein of unknown function; may play a role in cell wall biosynthesis, mutants have abormal relative levels of mannose and glucose and have Gap1p sorting and transport defects; (GFP)-fusion protein localizes to the cytoplasm	1274	145053	YLR436C	chr12	1004866	.	C	CA	779.79	PASS	AF=1;AO=55;DP=55;FAO=55;FDP=55;FR=.;FRO=0;FSAF=16;FSAR=39;FSRF=0;FSRR=0;FWDB=0.129037;FXX=0;HRUN=1;LEN=1;MLLD=34.2833;OALT=A;OID=.;OMAPALT=CA;OPOS=1004867;OREF=-;QD=56.712;RBI=0.136017;REFB=0;REVB=-0.0430146;RO=0;SAF=16;SAR=39;SRF=0;SRR=0;SSEN=0;SSEP=0;SSSB=-4.11947e-08;STB=0.5;STBP=1;TYPE=ins;VARB=0.00197741;ANN=CA|frameshift_variant|HIGH|YLR436C|YLR436C|transcript|TRANSCRIPT_YLR436C|protein_cod…	GT:GQ:DP:FDP:RO:FRO:AO:FAO:AF:SAR:SAF:SRF:SRR:FSAR:FSAF:FSRF:FSRR	1/1:4:55:55:0:0:55:55:1:39:16:0:0:39:16:0:0
S000000479	YBR275C	RIF1	RAP1-Interacting Factor	DNA-binding protein RIF1	Protein that binds to the Rap1p C-terminus	Protein that binds to the Rap1p C-terminus; acts synergistically with Rif2p to help control telomere length and establish telomeric silencing; involved in control of DNA replication; contributes to resection of DNA double strand breaks (DSBs); deletion results in telomere elongation	1916	217912	YBR275C	chr02	758722	.	TG	AC,TC	1119.14	PASS	AF=0.0266667,0.973333;AO=2,73;DP=75;FAO=2,73;FDP=75;FR=.;FRO=0;FSAF=2,35;FSAR=0,38;FSRF=0;FSRR=0;FWDB=0.0302933,0.0401421;FXX=0;HRUN=1,2;LEN=2,1;MLLD=231.178,291.065;OALT=AC,C;OID=.,.;OMAPALT=AC,TC;OPOS=758722,758723;OREF=TG,G;QD=59.6874;RBI=0.0315222,0.0407199;REFB=0,0;REVB=-0.00871583,-0.00683512;RO=0;SAF=2,35;SAR=0,38;SRF=0;SRR=0;SSEN=0,0;SSEP=0,0;SSSB=0,-3.90268e-08;STB=0.5,0.5;STBP=1,1;TYPE=…	GT:GQ:DP:FDP:RO:FRO:AO:FAO:AF:SAR:SAF:SRF:SRR:FSAR:FSAF:FSRF:FSRR	1/2:5:75:75:0:0:2,73:2,73:0.0266667,0.973333:0,38:2,35:0:0:0,38:2,35:0:0
S000003321	YGR089W	NNF2	None	None	Protein that exhibits physical and genetic interactions with Rpb8p	Protein that exhibits physical and genetic interactions with Rpb8p; Rpb8p is a subunit of RNA polymerases I, II, and III; computational analysis of large-scale protein-protein interaction data suggests a role in chromosome segregation	936	106477	YGR089W	chr07	664622	.	AAA	AGG	902.714	PASS	AF=1;AO=58;DP=62;FAO=62;FDP=62;FR=.;FRO=0;FSAF=31;FSAR=31;FSRF=0;FSRR=0;FWDB=0.01241;FXX=0;HRUN=7;LEN=2;MLLD=79.5243;OALT=GG;OID=.;OMAPALT=AGG;OPOS=664623;OREF=AA;QD=58.2396;RBI=0.0152612;REFB=0;REVB=0.00888229;RO=0;SAF=29;SAR=29;SRF=0;SRR=0;SSEN=0;SSEP=0;SSSB=0;STB=0.5;STBP=1;TYPE=mnp;VARB=6.52006e-05;ANN=AGG|missense_variant|MODERATE|YGR089W|YGR089W|transcript|TRANSCRIPT_YGR089W|protein_coding|…	GT:GQ:DP:FDP:RO:FRO:AO:FAO:AF:SAR:SAF:SRF:SRR:FSAR:FSAF:FSRF:FSRR	1/1:5:62:62:0:0:58:62:1:29:29:0:0:31:31:0:0
S000004000	YLR010C	TEN1	TElomeric pathways with STn1	None	Protein that regulates telomeric length	Protein that regulates telomeric length; protects telomeric ends in a complex with Cdc13p and Stn1p; similar to human Ten1 which is critical for the telomeric function of the CST (Cdc13p-Stn1p-Ten1p) complex	160	18604.8	YLR010C	chr12	168497	.	A	AT	735.429	PASS	AF=1;AO=51;DP=54;FAO=53;FDP=53;FR=.;FRO=0;FSAF=25;FSAR=28;FSRF=0;FSRR=0;FWDB=-0.0690386;FXX=0;HRUN=1;LEN=1;MLLD=31.9642;OALT=T;OID=.;OMAPALT=AT;OPOS=168498;OREF=-;QD=55.5041;RBI=0.0698873;REFB=0;REVB=0.0108581;RO=1;SAF=23;SAR=28;SRF=1;SRR=0;SSEN=0;SSEP=0;SSSB=-0.0200325;STB=0.5;STBP=1;TYPE=ins;VARB=-0.00147922;ANN=AT|frameshift_variant|HIGH|YLR010C|YLR010C|transcript|TRANSCRIPT_YLR010C|protein_co…	GT:GQ:DP:FDP:RO:FRO:AO:FAO:AF:SAR:SAF:SRF:SRR:FSAR:FSAF:FSRF:FSRR	1/1:4:54:53:1:0:51:53:1:28:23:1:0:28:25:0:0
S000005977	YPL056C	LCL1	Long Chronological Lifespan	None	Putative protein of unknown function	Putative protein of unknown function; deletion mutant is fluconazole resistant and has long chronological lifespan	101	11338.7	YPL056C	chr16	454045	.	T	C	739.07	PASS	AF=0.981481;AO=53;DP=54;FAO=53;FDP=54;FR=.;FRO=1;FSAF=27;FSAR=26;FSRF=0;FSRR=1;FWDB=-0.0267486;FXX=0;HRUN=2;LEN=1;MLLD=71.2971;OALT=C;OID=.;OMAPALT=C;OPOS=454045;OREF=T;QD=54.7459;RBI=0.0513931;REFB=-0.0947035;REVB=-0.0438835;RO=1;SAF=27;SAR=26;SRF=0;SRR=1;SSEN=0;SSEP=0;SSSB=0.0177765;STB=0.50943;STBP=0.549;TYPE=snp;VARB=0.00983458;ANN=C|missense_variant|MODERATE|YPL056C|YPL056C|transcript|TRANSC…	GT:GQ:DP:FDP:RO:FRO:AO:FAO:AF:SAR:SAF:SRF:SRR:FSAR:FSAF:FSRF:FSRR	0/1:4:54:54:1:1:53:53:0.981481:26:27:0:1:26:27:0:1
S000006166	YPL245W	None	None	None	Putative protein of unknown function	Putative protein of unknown function; green fluorescent protein (GFP)-fusion protein localizes to both the nucleus and the cytoplasm	454	52269.4	YPL245W	chr16	87048	.	CG	CGT,GT	709.813	PASS	AF=0.960784,0.0392157;AO=49,2;DP=56;FAO=49,2;FDP=51;FR=.;FRO=0;FSAF=27,2;FSAR=22,0;FSRF=0;FSRR=0;FWDB=0.031084,3.54504e-05;FXX=0;HRUN=1,2;LEN=1,2;MLLD=31.2086,6.51776;OALT=T,GT;OID=.,.;OMAPALT=CGT,GT;OPOS=87050,87048;OREF=-,CG;QD=55.6716;RBI=0.210368,0.059041;REFB=0,0;REVB=0.208059,0.059041;RO=5;SAF=27,2;SAR=22,0;SRF=3;SRR=2;SSEN=0,0;SSEP=0,0;SSSB=-0.00860355,0.589598;STB=0.5,0.5;STBP=1,1;TYPE=in…	GT:GQ:DP:FDP:RO:FRO:AO:FAO:AF:SAR:SAF:SRF:SRR:FSAR:FSAF:FSRF:FSRR	1/2:8:56:51:5:0:49,2:49,2:0.960784,0.0392157:22,0:27,2:3:2:22,0:27,2:0:0
S000004936	YMR317W	None	None	None	Putative protein of unknown function	Putative protein of unknown function; has some similarity to sialidase from Trypanosoma; YMR317W is not an essential gene	1140	113166	YMR317W	chr13	916151	.	CT	C,CC	1557.19	PASS	AF=0.040404,0.959596;AO=6,93;DP=99;FAO=4,95;FDP=99;FR=.;FRO=0;FSAF=4,46;FSAR=0,49;FSRF=0;FSRR=0;FWDB=0.0401614,0.0380769;FXX=0;HRUN=1,1;LEN=1,1;MLLD=320.581,341.976;OALT=-,C;OID=.,.;OMAPALT=C,CC;OPOS=916152,916152;OREF=T,T;QD=62.9168;RBI=0.0401666,0.0380958;REFB=0,0;REVB=-0.000646625,0.00120214;RO=0;SAF=6,44;SAR=0,49;SRF=0;SRR=0;SSEN=0,0;SSEP=0,0;SSSB=0,4.84593e-08;STB=0.5,0.5;STBP=1,1;TYPE=del,s…	GT:GQ:DP:FDP:RO:FRO:AO:FAO:AF:SAR:SAF:SRF:SRR:FSAR:FSAF:FSRF:FSRR	1/2:6:99:99:0:0:6,93:4,95:0.040404,0.959596:0,49:6,44:0:0:0,49:4,46:0:0
S000004936	YMR317W	None	None	None	Putative protein of unknown function	Putative protein of unknown function; has some similarity to sialidase from Trypanosoma; YMR317W is not an essential gene	1140	113166	YMR317W	chr13	919133	.	A	AC,C	954.424	PASS	AF=1,0;AO=65,3;DP=68;FAO=65,0;FDP=65;FR=.;FRO=0;FSAF=32,0;FSAR=33,0;FSRF=0;FSRR=0;FWDB=-0.016608,-0.0156813;FXX=0;HRUN=0,6;LEN=1,1;MLLD=219.582,189.039;OALT=C,C;OID=.,.;OMAPALT=AC,C;OPOS=919134,919133;OREF=-,A;QD=58.7338;RBI=0.0166373,0.0161967;REFB=0,0;REVB=-0.000986906,-0.00405339;RO=0;SAF=31,2;SAR=34,1;SRF=0;SRR=0;SSEN=0,0;SSEP=0,0;SSSB=4.90682e-08,0;STB=0.5,0.5;STBP=1,1;TYPE=ins,snp;VARB=-1.2…	GT:GQ:DP:FDP:RO:FRO:AO:FAO:AF:SAR:SAF:SRF:SRR:FSAR:FSAF:FSRF:FSRR	1/1:5:68:65:0:0:65,3:65,0:1,0:34,1:31,2:0:0:33,0:32,0:0:0
S000003729	YJL193W	None	None	None	Putative protein of unknown function	Putative protein of unknown function; predicted to encode a triose phosphate transporter subfamily member based on phylogenetic analysis; similar to YOR307C/SLY41; deletion mutant has a respiratory growth defect	402	45954.7	YJL193W	chr10	75100	.	ATT	A,AT	310.707	PASS	AF=0,1;AO=3,27;DP=44;FAO=0,41;FDP=41;FR=.;FRO=0;FSAF=0,31;FSAR=0,10;FSRF=0;FSRR=0;FWDB=-0.000406813,0.000506718;FXX=0.108672;HRUN=7,7;LEN=2,1;MLLD=9.86669,10.2222;OALT=-,-;OID=.,.;OMAPALT=A,AT;OPOS=75101,75101;OREF=TT,T;QD=30.3129;RBI=0.00247362,0.00237165;REFB=0.025671,0.0275223;REVB=0.00243993,-0.00231689;RO=5;SAF=2,24;SAR=1,3;SRF=4;SRR=1;SSEN=0,0;SSEP=0,0;SSSB=-0.152533,0.0613319;STB=0.5,0.5;S…	GT:GQ:DP:FDP:RO:FRO:AO:FAO:AF:SAR:SAF:SRF:SRR:FSAR:FSAF:FSRF:FSRR	0/2:6:44:41:5:0:3,27:0,41:0,1:1,3:2,24:4:1:0,10:0,31:0:0
S000003977	YLL054C	None	None	None	Putative protein of unknown function with similarity to Pip2p	Putative protein of unknown function with similarity to Pip2p; an oleate-specific transcriptional activator of peroxisome proliferation; YLL054C is not an essential gene	843	97601	YLL054C	chr12	34586	.	AAATATTCCAAACTTAGAATGTCAGAATCTCCTTCTGGAATC	A	50	PASS	AF=1.68421;AO=32;DP=19;FR=.;LEN=41;OALT=-;OID=.;OMAPALT=A;OPOS=34587;OREF=AATATTCCAAACTTAGAATGTCAGAATCTCCTTCTGGAATC;RO=0;SAF=13;SAR=19;SRF=0;SRR=0;TYPE=del;ANN=A|frameshift_variant|HIGH|YLL054C|YLL054C|transcript|TRANSCRIPT_YLL054C|protein_coding|1/1|c.1278_1318delGATTCCAGAAGGAGATTCTGACATTCTAAGTTTGGAATATT|p.Leu426fs|1318/2311|1278/2311|426/769||WARNING_TRANSCRIPT_INCOMPLETE;LOF=(YLL054C|YLL054C|1…	GT:GQ:DP:RO:AO:SAF:SAR:SRF:SRR:AF	1/1:99:19:0:32:13:19:0:0:1.68421
S000001651	YKL168C	KKQ8	None	putative serine/threonine protein kinase KKQ8	Putative serine/threonine protein kinase with unknown cellular role	Putative serine/threonine protein kinase with unknown cellular role; KKQ8 has a paralog, HAL5, that arose from the whole genome duplication	724	82607.4	YKL168C	chr11	138301	.	A	AC,ATC	730.285	PASS	AF=1,0;AO=45,2;DP=47;FAO=47,0;FDP=47;FR=.;FRO=0;FSAF=33,0;FSAR=14,0;FSRF=0;FSRR=0;FWDB=-0.0172442,-0.0187826;FXX=0;HRUN=1,0;LEN=1,2;MLLD=270.775,91.3604;OALT=C,TC;OID=.,.;OMAPALT=AC,ATC;OPOS=138302,138302;OREF=-,-;QD=62.1519;RBI=0.0220048,0.0224875;REFB=0,0;REVB=0.0136692,0.0123652;RO=0;SAF=33,0;SAR=12,2;SRF=0;SRR=0;SSEN=0,0;SSEP=0,0;SSSB=0,0;STB=0.5,0.5;STBP=1,1;TYPE=ins,ins;VARB=-1.43575e-05,-0…	GT:GQ:DP:FDP:RO:FRO:AO:FAO:AF:SAR:SAF:SRF:SRR:FSAR:FSAF:FSRF:FSRR	1/1:4:47:47:0:0:45,2:47,0:1,0:12,2:33,0:0:0:14,0:33,0:0:0
S000005355	YNR072W	HXT17	HeXose Transporter	hexose transporter HXT17 HLT4	Putative transmembrane polyol transporter	Putative transmembrane polyol transporter; supports growth on and uptake of mannitol and sorbitol with moderate affinity when overexpressed in a strain deleted for hexose family members; minor hexose transport activity when overexpressed in a similar strain; induced by raffinose and galactose at pH 7.7 versus pH 4.7, repressed by high levels of glucose; HXT17 has a paralog, HXT13, that arose from…	564	62827.8	YNR072W	chr14	797626	.	CT	C,CC	712.232	PASS	AF=0.0652174,0.934783;AO=8,38;DP=47;FAO=3,43;FDP=46;FR=.;FRO=0;FSAF=1,18;FSAR=2,25;FSRF=0;FSRR=0;FWDB=0.00346248,0.00527726;FXX=0.0212721;HRUN=1,1;LEN=1,1;MLLD=211.751,224.453;OALT=-,C;OID=.,.;OMAPALT=C,CC;OPOS=797627,797627;OREF=T,T;QD=61.9332;RBI=0.0307659,0.0149731;REFB=0,0;REVB=-0.0305704,-0.0140123;RO=0;SAF=2,17;SAR=6,21;SRF=0;SRR=0;SSEN=0,0;SSEP=0,0;SSSB=-5.58669e-08,3.53998e-08;STB=0.5,0.5…	GT:GQ:DP:FDP:RO:FRO:AO:FAO:AF:SAR:SAF:SRF:SRR:FSAR:FSAF:FSRF:FSRR	1/2:10:47:46:0:0:8,38:3,43:0.0652174,0.934783:6,21:2,17:0:0:2,25:1,18:0:0
S000002674	YDR266C	HEL2	Histone E3 Ligase	E3 ubiquitin-protein ligase HEL2	RING finger ubiquitin ligase (E3)	RING finger ubiquitin ligase (E3); involved in ubiquitination and degradation of excess histones; interacts with Ubc4p and Rad53p; null mutant sensitive to hydroxyurea (HU); green fluorescent protein (GFP)-fusion protein localizes to the cytoplasm; computational analysis suggests a role as a transcription factor	639	72779	YDR266C	chr04	1004919	.	G	GT,GTT	581.342	PASS	AF=1,0;AO=44,2;DP=54;FAO=51,0;FDP=51;FR=.;FRO=0;FSAF=27,0;FSAR=24,0;FSRF=0;FSRR=0;FWDB=-0.0883829,-0.0463158;FXX=0.0192271;HRUN=4,4;LEN=1,2;MLLD=15.7169,5.9239;OALT=T,TT;OID=.,.;OMAPALT=GT,GTT;OPOS=1004920,1004920;OREF=-,-;QD=45.5955;RBI=0.0890928,0.0467509;REFB=0.00180756,0.00269836;REVB=0.0112248,0.0063633;RO=7;SAF=25,1;SAR=19,1;SRF=1;SRR=6;SSEN=0,0;SSEP=0,0;SSSB=0.109309,0.402818;STB=0.5,0.5;S…	GT:GQ:DP:FDP:RO:FRO:AO:FAO:AF:SAR:SAF:SRF:SRR:FSAR:FSAF:FSRF:FSRR	1/1:3:54:51:7:0:44,2:51,0:1,0:19,1:25,1:1:6:24,0:27,0:0:0
S000005095	YNL151C	RPC31	RNA Polymerase C	ACP2 RPC8 DNA-directed RNA polymerase III subunit C31 C31	RNA polymerase III subunit C31	RNA polymerase III subunit C31	251	27695.1	YNL151C	chr14	372934	.	C	G	834.358	PASS	AF=1;AO=58;DP=58;FAO=58;FDP=58;FR=.;FRO=0;FSAF=39;FSAR=19;FSRF=0;FSRR=0;FWDB=0.00879638;FXX=0;HRUN=2;LEN=1;MLLD=82.9693;OALT=G;OID=.;OMAPALT=G;OPOS=372934;OREF=C;QD=57.5419;RBI=0.0132134;REFB=0;REVB=-0.00985992;RO=0;SAF=39;SAR=19;SRF=0;SRR=0;SSEN=0;SSEP=0;SSSB=-3.47594e-08;STB=0.5;STBP=1;TYPE=snp;VARB=-1.09967e-05;ANN=G|missense_variant|MODERATE|YNL151C|YNL151C|transcript|TRANSCRIPT_YNL151C|prote…	GT:GQ:DP:FDP:RO:FRO:AO:FAO:AF:SAR:SAF:SRF:SRR:FSAR:FSAF:FSRF:FSRR	1/1:5:58:58:0:0:58:58:1:19:39:0:0:19:39:0:0
S000003658	YJL122W	ALB1	Arx1 Little Brother	None	Shuttling pre-60S factor	Shuttling pre-60S factor; involved in the biogenesis of ribosomal large subunit; interacts directly with Arx1p; responsible for Tif6p recycling defects in absence of Rei1p	175	19301.4	YJL122W	chr10	193473	.	A	AT	1045.28	PASS	AF=1;AO=67;DP=76;FAO=70;FDP=70;FR=.;FRO=0;FSAF=39;FSAR=31;FSRF=0;FSRR=0;FWDB=0.00673651;FXX=0.0277739;HRUN=0;LEN=1;MLLD=331.177;OALT=T;OID=.;OMAPALT=AT;OPOS=193474;OREF=-;QD=59.7304;RBI=0.00785926;REFB=0;REVB=0.00404814;RO=4;SAF=37;SAR=30;SRF=1;SRR=3;SSEN=0;SSEP=0;SSSB=0.0323551;STB=0.5;STBP=1;TYPE=ins;VARB=2.35017e-05;ANN=AT|frameshift_variant|HIGH|YJL122W|YJL122W|transcript|TRANSCRIPT_YJL122W|p…	GT:GQ:DP:FDP:RO:FRO:AO:FAO:AF:SAR:SAF:SRF:SRR:FSAR:FSAF:FSRF:FSRR	1/1:6:76:70:4:0:67:70:1:30:37:1:3:31:39:0:0
S000000572	YCL067C	HMLALPHA2	Hidden Mat Left ALPHA	homeodomain mating type protein alpha2 ALPHA2	Silenced copy of ALPHA2 at HML	Silenced copy of ALPHA2 at HML; homeobox-domain protein that associates with Mcm1p in haploid cells to repress a-specific gene expression and interacts with a1p in diploid cells to repress haploid-specific gene expression	210	24291.4	YCL067C	chr03	13001	.	C	CT	598.122	PASS	AF=1;AO=3;DP=72;FAO=72;FDP=72;FR=.;FRO=0;FSAF=37;FSAR=35;FSRF=0;FSRR=0;FWDB=-0.0558966;FXX=0;HRUN=3;LEN=1;MLLD=10.7189;OALT=T;OID=.;OMAPALT=CT;OPOS=13002;OREF=-;QD=33.229;RBI=0.173312;REFB=0;REVB=-0.164051;RO=65;SAF=1;SAR=2;SRF=36;SRR=29;SSEN=0;SSEP=0;SSSB=-0.181873;STB=0.5;STBP=1;TYPE=ins;VARB=-0.00441961;ANN=CT|frameshift_variant|HIGH|YCL067C|YCL067C|transcript|TRANSCRIPT_YCL067C|protein_coding…	GT:GQ:DP:FDP:RO:FRO:AO:FAO:AF:SAR:SAF:SRF:SRR:FSAR:FSAF:FSRF:FSRR	1/1:4:72:72:65:0:3:72:1:2:1:36:29:35:37:0:0
S000004376	YLR384C	IKI3	Insensitive to KIller toxin	TOT1 ELP1 KTI7 Elongator subunit IKI3	Subunit of Elongator complex	Subunit of Elongator complex; Elongator is required for modification of wobble nucleosides in tRNA; maintains structural integrity of Elongator; homolog of human IKAP, mutations in which cause familial dysautonomia (FD)	1349	152930	YLR384C	chr12	882928	.	TC	CT,TCT,TCTT	663.092	PASS	AF=0.06,0.94,0;AO=5,37,6;DP=54;FAO=3,47,0;FDP=50;FR=.;FRO=0;FSAF=2,33,0;FSAR=1,14,0;FSRF=0;FSRR=0;FWDB=-0.0797877,-0.169813,-0.0873961;FXX=0.019604;HRUN=5,1,1;LEN=2,1,2;MLLD=14.1226,22.9315,7.96268;OALT=CT,T,TT;OID=.,.,.;OMAPALT=CT,TCT,TCTT;OPOS=882928,882930,882930;OREF=TC,-,-;QD=53.0474;RBI=0.110032,0.17401,0.0897022;REFB=0,0,0;REVB=0.0757695,0.0379877,0.0202091;RO=3;SAF=3,25,6;SAR=2,12,0;SRF=2…	GT:GQ:DP:FDP:RO:FRO:AO:FAO:AF:SAR:SAF:SRF:SRR:FSAR:FSAF:FSRF:FSRR	1/2:11:54:50:3:0:5,37,6:3,47,0:0.06,0.94,0:2,12,0:3,25,6:2:1:1,14,0:2,33,0:0:0
S000006068	YPL147W	PXA1	PeroXisomal ABC-transporter	LPI1 PAL1 PAT2 SSH2 ATP-binding cassette long-chain fatty acid transporter PXA1	Subunit of heterodimeric peroxisomal ABC transport complex, with Pxa2p	Subunit of heterodimeric peroxisomal ABC transport complex, with Pxa2p; required for import of long-chain fatty acids into peroxisomes; similar to human adrenoleukodystrophy transporters ABCD1and ABCD2, and ALD-related proteins; mutations in ABCD1 cause X-linked adrenoleukodystrophy (X-ALD), a peroxisomal disorder; human ABCD1 and ABCD2 can each partially complement yeast pxa1 pxa2 double null mu…	870	100058	YPL147W	chr16	275245	.	A	AC	847.269	PASS	AF=1;AO=59;DP=59;FAO=59;FDP=59;FR=.;FRO=0;FSAF=33;FSAR=26;FSRF=0;FSRR=0;FWDB=-0.0835192;FXX=0;HRUN=1;LEN=1;MLLD=36.0491;OALT=C;OID=.;OMAPALT=AC;OPOS=275246;OREF=-;QD=57.442;RBI=0.10679;REFB=0;REVB=0.0665484;RO=0;SAF=33;SAR=26;SRF=0;SRR=0;SSEN=0;SSEP=0;SSSB=-3.00382e-08;STB=0.5;STBP=1;TYPE=ins;VARB=-0.000392369;ANN=AC|frameshift_variant|HIGH|YPL147W|YPL147W|transcript|TRANSCRIPT_YPL147W|protein_co…	GT:GQ:DP:FDP:RO:FRO:AO:FAO:AF:SAR:SAF:SRF:SRR:FSAR:FSAF:FSRF:FSRR	1/1:5:59:59:0:0:59:59:1:26:33:0:0:26:33:0:0
S000001337	YIL075C	RPN2	Regulatory Particle Non-ATPase	SEN3 proteasome regulatory particle base subunit RPN2	Subunit of the 26S proteasome	Subunit of the 26S proteasome; substrate of the N-acetyltransferase Nat1p; protein abundance increases in response to DNA replication stress	945	104223	YIL075C	chr09	220098	.	C	CA,CAA	419.241	PASS	AF=1,0;AO=52,5;DP=96;FAO=92,0;FDP=92;FR=.;FRO=0;FSAF=50,0;FSAR=42,0;FSRF=0;FSRR=0;FWDB=0.00398662,0.000984021;FXX=0.0107515;HRUN=5,5;LEN=1,2;MLLD=6.7307,7.33568;OALT=A,AA;OID=.,.;OMAPALT=CA,CAA;OPOS=220099,220099;OREF=-,-;QD=18.2279;RBI=0.100306,0.0516533;REFB=0.0436556,0.0440795;REVB=0.100227,0.0516439;RO=37;SAF=27,4;SAR=25,1;SRF=23;SRR=14;SSEN=0,0;SSEP=0,0;SSSB=-0.0783062,0.237246;STB=0.5,0.5;S…	GT:GQ:DP:FDP:RO:FRO:AO:FAO:AF:SAR:SAF:SRF:SRR:FSAR:FSAF:FSRF:FSRR	0/1:4:96:92:37:0:52,5:92,0:1,0:25,1:27,4:23:14:42,0:50,0:0:0
S000000262	YBR058C	UBP14	UBiquitin-specific Protease	GID6 ubiquitin-specific protease UBP14	Ubiquitin-specific protease	Ubiquitin-specific protease; specifically disassembles unanchored ubiquitin chains; involved in fructose-1,6-bisphosphatase (Fbp1p) degradation; similar to human isopeptidase T	781	88601.8	YBR058C	chr02	354021	.	G	GT,T	921.236	PASS	AF=0.984375,0.015625;AO=61,3;DP=66;FAO=63,1;FDP=64;FR=.;FRO=0;FSAF=24,1;FSAR=39,0;FSRF=0;FSRR=0;FWDB=0.0256483,-0.0302631;FXX=0;HRUN=1,2;LEN=1,1;MLLD=34.9378,5.40587;OALT=T,T;OID=.,.;OMAPALT=GT,T;OPOS=354022,354021;OREF=-,G;QD=57.5772;RBI=0.0704067,0.0541306;REFB=0,0;REVB=0.0655688,-0.0448805;RO=2;SAF=24,1;SAR=37,2;SRF=1;SRR=1;SSEN=0,0;SSEP=0,0;SSSB=-0.00667491,-0.111102;STB=0.5,0.5;STBP=1,1;TYPE…	GT:GQ:DP:FDP:RO:FRO:AO:FAO:AF:SAR:SAF:SRF:SRR:FSAR:FSAF:FSRF:FSRR	1/2:3:66:64:2:0:61,3:63,1:0.984375,0.015625:37,2:24,1:1:1:39,0:24,1:0:0
S000001392	YIL130W	ASG1	Activator of Stress Genes	None	Zinc cluster protein proposed to be a transcriptional regulator	Zinc cluster protein proposed to be a transcriptional regulator; regulator involved in the stress response; null mutants have a respiratory deficiency, calcofluor white sensitivity and slightly increased cycloheximide resistance	964	108770	YIL130W	chr09	106879	.	A	AAAT,AAT,T	513.53	PASS	AF=1,0,0;AO=27,5,5;DP=40;FAO=35,0,0;FDP=35;FR=.;FRO=0;FSAF=16,0,0;FSAR=19,0,0;FSRF=0;FSRR=0;FWDB=-0.0521284,-0.0663506,-0.0552086;FXX=0.0540395;HRUN=5,5,5;LEN=3,2,1;MLLD=215.853,200.804,159.929;OALT=AAT,AT,T;OID=.,.,.;OMAPALT=AAAT,AAT,T;OPOS=106880,106880,106879;OREF=-,-,A;QD=58.6891;RBI=0.0526259,0.0677542,0.0614214;REFB=0,0,0;REVB=-0.00721925,-0.0137197,-0.0269183;RO=2;SAF=11,4,1;SAR=16,1,4;SRF…	GT:GQ:DP:FDP:RO:FRO:AO:FAO:AF:SAR:SAF:SRF:SRR:FSAR:FSAF:FSRF:FSRR	1/1:4:40:35:2:0:27,5,5:35,0,0:1,0,0:16,1,4:11,4,1:2:0:19,0,0:16,0,0:0:0

## Sheet: pre7 mutant
SGDID	Systematic	Gene	Gene Name	Alias	Short Description	Description	Length	MW	Systematics	CHROM	POS	ID	REF	ALT	QUAL	FILTER	INFO	GT	AD
S000006156	YPL235W	RVB2	RuVB-like	TIP49B TIP48 TIH2 RuvB family ATP-dependent DNA helicase reptin	ATP-dependent DNA helicase, also known as reptin	ATP-dependent DNA helicase, also known as reptin; member of the AAA+ and RuvB protein families, similar to Rvb1p; conserved component of multiple complexes including the INO80 complex, the Swr1 complex, and the R2TP complex (Rvb1-Rvb2-Tah1-Pih1); involved in multiple processes such as chromatin remodeling, box C/D snoRNP assembly, and RNA polymerase II assembly	471	51598.1	YPL235W	chr16	104080	.	T	G	2847.05	PASS	AF=1;AO=181;DP=181;FAO=181;FDP=181;FR=.;FRO=0;FSAF=88;FSAR=93;FSRF=0;FSRR=0;FWDB=0.0173077;FXX=0;HRUN=1;LEN=1;MLLD=202;OALT=G;OID=.;OMAPALT=G;OPOS=104080;OREF=T;QD=62.9182;RBI=0.0201229;REFB=0;REVB=0.0102653;RO=0;SAF=88;SAR=93;SRF=0;SRR=0;SSEN=0;SSEP=0;SSSB=0;STB=0.5;STBP=1;TYPE=snp;VARB=2.15948e-05;ANN=G|missense_variant|MODERATE|YPL235W|YPL235W|transcript|TRANSCRIPT_YPL235W|protein_coding|1/1|c…	GT:GQ:DP:FDP:RO:FRO:AO:FAO:AF:SAR:SAF:SRF:SRR:FSAR:FSAF:FSRF:FSRR	1/1:15:181:181:0:0:181:181:1:93:88:0:0:93:88:0:0
S000000137	YBL041W	PRE7	PRoteinase yscE	proteasome core particle subunit beta 6 PRS3	Beta 6 subunit of the 20S proteasome	Beta 6 subunit of the 20S proteasome	241	26866.3	YBL041W	chr02	141308	.	A	C	2140.66	PASS	AF=1;AO=136;DP=136;FAO=136;FDP=136;FR=.;FRO=0;FSAF=77;FSAR=59;FSRF=0;FSRR=0;FWDB=0.0162541;FXX=0;HRUN=1;LEN=1;MLLD=105.159;OALT=C;OID=.;OMAPALT=C;OPOS=141308;OREF=A;QD=62.9604;RBI=0.0163587;REFB=0;REVB=0.00184672;RO=0;SAF=77;SAR=59;SRF=0;SRR=0;SSEN=0;SSEP=0;SSSB=0;STB=0.5;STBP=1;TYPE=snp;VARB=4.97441e-05;ANN=C|missense_variant|MODERATE|YBL041W|YBL041W|transcript|TRANSCRIPT_YBL041W|protein_coding|…	GT:GQ:DP:FDP:RO:FRO:AO:FAO:AF:SAR:SAF:SRF:SRR:FSAR:FSAF:FSRF:FSRR	1/1:11:136:136:0:0:136:136:1:59:77:0:0:59:77:0:0
S000003926	YLL003W	SFI1	Suppressor of Fermentation Induced loss of stress resistance	None	Centrin (Cdc31p)-binding protein required for SPB duplication	Centrin (Cdc31p)-binding protein required for SPB duplication; localizes to the half-bridge of the spindle pole body (SPB); required for progression through G(2)-M transition; phosphorylated by Cdc28p-Clb2p and by Cdc5p; dephosphorylated by Cdc14p; has similarity to Xenopus laevis XCAP-C	946	113039	YLL003W	chr12	146697	.	A	G	2610.91	PASS	AF=1;AO=166;DP=166;FAO=169;FDP=169;FR=.;FRO=0;FSAF=98;FSAR=71;FSRF=0;FSRR=0;FWDB=-0.00364127;FXX=0;HRUN=1;LEN=1;MLLD=314.857;OALT=G;OID=.;OMAPALT=G;OPOS=146697;OREF=A;QD=61.7967;RBI=0.00614299;REFB=0;REVB=0.00494747;RO=0;SAF=95;SAR=71;SRF=0;SRR=0;SSEN=0;SSEP=0;SSSB=-3.13054e-08;STB=0.5;STBP=1;TYPE=snp;VARB=7.33166e-07;ANN=G|missense_variant|MODERATE|YLL003W|YLL003W|transcript|TRANSCRIPT_YLL003W|p…	GT:GQ:DP:FDP:RO:FRO:AO:FAO:AF:SAR:SAF:SRF:SRR:FSAR:FSAF:FSRF:FSRR	1/1:14:166:169:0:0:166:169:1:71:95:0:0:71:98:0:0
S000004109	YLR119W	SRN2	Suppressor of Rna mutations, Number 2	VPL16 ESCRT-I subunit protein SRN2 VPS37 SRN10	Component of the ESCRT-I complex	Component of the ESCRT-I complex; ESCRT-I is involved in ubiquitin-dependent sorting of proteins into the endosome; suppressor of rna1-1 mutation; may be involved in RNA export from nucleus	213	25106	YLR119W	chr12	386480	.	G	GA,GAA,GAAA	1981.72	PASS	AF=0,1,0;AO=5,120,5;DP=140;FAO=0,130,0;FDP=130;FR=.;FRO=0;FSAF=0,59,0;FSAR=0,71,0;FSRF=0;FSRR=0;FWDB=0.0279913,0.0146552,0.00979541;FXX=0.0370343;HRUN=3,3,3;LEN=1,2,3;MLLD=17.4177,31.9673,18.2921;OALT=A,AA,AAA;OID=.,.,.;OMAPALT=GA,GAA,GAAA;OPOS=386481,386481,386481;OREF=-,-,-;QD=60.976;RBI=0.0340913,0.0171134,0.0114114;REFB=0,0,0;REVB=-0.0194603,-0.0088369,-0.005854;RO=9;SAF=4,51,4;SAR=1,69,1;SRF…	GT:GQ:DP:FDP:RO:FRO:AO:FAO:AF:SAR:SAF:SRF:SRR:FSAR:FSAF:FSRF:FSRR	2/2:11:140:130:9:0:5,120,5:0,130,0:0,1,0:1,69,1:4,51,4:5:4:0,71,0:0,59,0:0:0
S000005041	YNL097C	PHO23	PHOsphate metabolism	None	Component of the Rpd3L histone deacetylase complex	Component of the Rpd3L histone deacetylase complex; involved in transcriptional regulation of PHO5; affects termination of snoRNAs and cryptic unstable transcripts (CUTs); C-terminus shares significant sequence identity with the human candidate tumor suppressor p33-ING1 and its isoform ING3	330	37026	YNL097C	chr14	466722	.	C	T	3145.66	PASS	AF=1;AO=209;DP=209;FAO=203;FDP=203;FR=.;FRO=0;FSAF=104;FSAR=99;FSRF=0;FSRR=0;FWDB=0.00298083;FXX=0.0287068;HRUN=5;LEN=1;MLLD=301.608;OALT=T;OID=.;OMAPALT=T;OPOS=466722;OREF=C;QD=61.9834;RBI=0.0112396;REFB=0;REVB=0.0108371;RO=0;SAF=105;SAR=104;SRF=0;SRR=0;SSEN=0;SSEP=0;SSSB=0;STB=0.5;STBP=1;TYPE=snp;VARB=4.51927e-06;ANN=T|missense_variant|MODERATE|YNL097C|YNL097C|transcript|TRANSCRIPT_YNL097C|prot…	GT:GQ:DP:FDP:RO:FRO:AO:FAO:AF:SAR:SAF:SRF:SRR:FSAR:FSAF:FSRF:FSRR	1/1:17:209:203:0:0:209:203:1:104:105:0:0:99:104:0:0
S000005900	YOR373W	NUD1	None	None	Component of the spindle pole body outer plaque	Component of the spindle pole body outer plaque; acts through the mitotic exit network to specify asymmetric spindle pole body inheritance	851	94100.1	YOR373W	chr15	1036982	.	ACA	A,AA,AAA	904.551	PASS	AF=0,1,0;AO=10,57,8;DP=75;FAO=0,63,0;FDP=63;FR=.;FRO=0;FSAF=0,28,0;FSAR=0,35,0;FSRF=0;FSRR=0;FWDB=0.0555071,0.0573239,0.0540446;FXX=0;HRUN=1,1,1;LEN=2,1,1;MLLD=129.984,144.682,130.98;OALT=-,-,A;OID=.,.,.;OMAPALT=A,AA,AAA;OPOS=1036983,1036983,1036983;OREF=CA,C,C;QD=57.4318;RBI=0.0623687,0.0616858,0.0565771;REFB=0,0,0;REVB=0.0284397,0.0227839,0.0167376;RO=0;SAF=8,23,3;SAR=2,34,5;SRF=0;SRR=0;SSEN=0,…	GT:GQ:DP:FDP:RO:FRO:AO:FAO:AF:SAR:SAF:SRF:SRR:FSAR:FSAF:FSRF:FSRR	2/2:5:75:63:0:0:10,57,8:0,63,0:0,1,0:2,34,5:8,23,3:0:0:0,35,0:0,28,0:0:0
S000002815	YDR407C	TRS120	TRapp Subunit	None	Component of transport protein particle (TRAPP) complex II	Component of transport protein particle (TRAPP) complex II; TRAPPII is a multimeric guanine nucleotide-exchange factor for the GTPase Ypt1p, regulating intra-Golgi and endosome-Golgi traffic	1289	147664	YDR407C	chr04	1290296	.	T	TC	3117.28	PASS	AF=1;AO=193;DP=197;FAO=197;FDP=197;FR=.;FRO=0;FSAF=117;FSAR=80;FSRF=0;FSRR=0;FWDB=-0.0136124;FXX=0;HRUN=0;LEN=1;MLLD=278.177;OALT=C;OID=.;OMAPALT=TC;OPOS=1290297;OREF=-;QD=63.2949;RBI=0.0136583;REFB=0;REVB=-0.00111836;RO=3;SAF=116;SAR=77;SRF=0;SRR=3;SSEN=0;SSEP=0;SSSB=0.0181883;STB=0.5;STBP=1;TYPE=ins;VARB=-8.37181e-06;ANN=TC|frameshift_variant|HIGH|YDR407C|YDR407C|transcript|TRANSCRIPT_YDR407C|p…	GT:GQ:DP:FDP:RO:FRO:AO:FAO:AF:SAR:SAF:SRF:SRR:FSAR:FSAF:FSRF:FSRR	1/1:17:197:197:3:0:193:197:1:77:116:0:3:80:117:0:0
S000003398	YGR166W	TRS65	TRapp Subunit	KRE11	Component of transport protein particle (TRAPP) complex II	Component of transport protein particle (TRAPP) complex II; TRAPPII is a multimeric guanine nucleotide-exchange factor for the GTPase Ypt1p, regulating intra-Golgi and endosome-Golgi traffic; role in cell wall beta-glucan biosynthesis and the stress response	560	63377.5	YGR166W	chr07	842714	.	T	TC	1709.02	PASS	AF=1;AO=14;DP=166;FAO=164;FDP=164;FR=.;FRO=0;FSAF=73;FSAR=91;FSRF=0;FSRR=0;FWDB=0.187144;FXX=0.0120475;HRUN=4;LEN=1;MLLD=14.3752;OALT=C;OID=.;OMAPALT=TC;OPOS=842715;OREF=-;QD=41.6835;RBI=0.230536;REFB=0;REVB=-0.134626;RO=152;SAF=3;SAR=11;SRF=72;SRR=80;SSEN=0;SSEP=0;SSSB=-0.309126;STB=0.5;STBP=1;TYPE=ins;VARB=0.00148014;ANN=TC|frameshift_variant|HIGH|YGR166W|YGR166W|transcript|TRANSCRIPT_YGR166W|p…	GT:GQ:DP:FDP:RO:FRO:AO:FAO:AF:SAR:SAF:SRF:SRR:FSAR:FSAF:FSRF:FSRR	1/1:11:166:164:152:0:14:164:1:11:3:72:80:91:73:0:0
S000007270	Q0105	COB	CytochrOme B	cytochrome b COB1 CYTB	Cytochrome b	Cytochrome b; mitochondrially encoded subunit of the ubiquinol-cytochrome c reductase complex which includes Cobp, Rip1p, Cyt1p, Cor1p, Qcr2p, Qcr6p, Qcr7p, Qcr8p, Qcr9p, and Qcr10p	385	43661.2	Q0105	chrm	63765	.	G	A	23650.1	PASS	AF=1;AO=1182;DP=1511;FAO=1502;FDP=1502;FR=.,HEALED;FRO=0;FSAF=759;FSAR=743;FSRF=0;FSRR=0;FWDB=0.0537569;FXX=0.00595628;HRUN=1;LEN=1;MLLD=212.664;OALT=A;OID=.;OMAPALT=A;OPOS=63765;OREF=G;QD=62.983;RBI=0.0819978;REFB=0;REVB=0.0619179;RO=0;SAF=552;SAR=630;SRF=0;SRR=0;SSEN=0;SSEP=0;SSSB=0;STB=0.5;STBP=1;TYPE=snp;VARB=0.00147319;ANN=A|missense_variant|MODERATE|Q0120|Q0120|transcript|TRANSCRIPT_Q0120|p…	GT:GQ:DP:FDP:RO:FRO:AO:FAO:AF:SAR:SAF:SRF:SRR:FSAR:FSAF:FSRF:FSRR	1/1:130:1511:1502:0:0:1182:1502:1:630:552:0:0:743:759:0:0
S000028527	YPL189C-A	COA2	Cytochrome Oxidase Assembly	None	Cytochrome oxidase assembly factor	Cytochrome oxidase assembly factor; null mutation results in respiratory deficiency with specific loss of cytochrome oxidase activity; functions downstream of assembly factors Mss51p and Coa1p and interacts with assembly factor Shy1p	68	7536.9	YPL189C-A	chr16	188775	.	G	A	2681.88	PASS	AF=1;AO=158;DP=173;FAO=173;FDP=173;FR=.,HEALED;FRO=0;FSAF=95;FSAR=78;FSRF=0;FSRR=0;FWDB=0.0297309;FXX=0;HRUN=1;LEN=1;MLLD=304.435;OALT=A;OID=.;OMAPALT=A;OPOS=188775;OREF=G;QD=62.0088;RBI=0.049885;REFB=0;REVB=0.0400573;RO=0;SAF=82;SAR=76;SRF=0;SRR=0;SSEN=0;SSEP=0;SSSB=3.38593e-08;STB=0.5;STBP=1;TYPE=snp;VARB=0.000233665;ANN=A|missense_variant|MODERATE|YPL189C-A|YPL189C-A|transcript|TRANSCRIPT_YPL1…	GT:GQ:DP:FDP:RO:FRO:AO:FAO:AF:SAR:SAF:SRF:SRR:FSAR:FSAF:FSRF:FSRR	1/1:15:173:173:0:0:158:173:1:76:82:0:0:78:95:0:0
S000006005	YPL084W	BRO1	BCK1-like Resistance to Osmotic shock	LPF2 ASI6 NPI3 VPS31	Cytoplasmic class E vacuolar protein sorting (VPS) factor	Cytoplasmic class E vacuolar protein sorting (VPS) factor; coordinates deubiquitination in the multivesicular body (MVB) pathway by recruiting Doa4p to endosomes	844	97253.6	YPL084W	chr16	395425	.	G	A	2640.29	PASS	AF=1;AO=170;DP=170;FAO=170;FDP=170;FR=.;FRO=0;FSAF=73;FSAR=97;FSRF=0;FSRR=0;FWDB=0.0152354;FXX=0;HRUN=1;LEN=1;MLLD=108.521;OALT=A;OID=.;OMAPALT=A;OPOS=395425;OREF=G;QD=62.1245;RBI=0.0184312;REFB=0;REVB=0.0103727;RO=0;SAF=73;SAR=97;SRF=0;SRR=0;SSEN=0;SSEP=0;SSSB=2.98294e-08;STB=0.5;STBP=1;TYPE=snp;VARB=4.94648e-05;ANN=A|missense_variant|MODERATE|YPL084W|YPL084W|transcript|TRANSCRIPT_YPL084W|protei…	GT:GQ:DP:FDP:RO:FRO:AO:FAO:AF:SAR:SAF:SRF:SRR:FSAR:FSAF:FSRF:FSRR	1/1:14:170:170:0:0:170:170:1:97:73:0:0:97:73:0:0
S000006012	YPL091W	GLR1	GLutathione Reductase	glutathione-disulfide reductase GLR1 LPG17	Cytosolic and mitochondrial glutathione oxidoreductase	Cytosolic and mitochondrial glutathione oxidoreductase; converts oxidized glutathione to reduced glutathione; cytosolic Glr1p is the main determinant of the glutathione redox state of the mitochondrial intermembrane space; mitochondrial Glr1p has a role in resistance to hyperoxia; protein abundance increases in response to DNA replication stress	483	53442.5	YPL091W	chr16	377045	.	T	A	2566.25	PASS	AF=1;AO=166;DP=166;FAO=166;FDP=166;FR=.;FRO=0;FSAF=80;FSAR=86;FSRF=0;FSRR=0;FWDB=-0.0016641;FXX=0;HRUN=1;LEN=1;MLLD=277.243;OALT=A;OID=.;OMAPALT=A;OPOS=377045;OREF=T;QD=61.8374;RBI=0.0121057;REFB=0;REVB=-0.0119907;RO=0;SAF=80;SAR=86;SRF=0;SRR=0;SSEN=0;SSEP=0;SSSB=-3.06912e-08;STB=0.5;STBP=1;TYPE=snp;VARB=-9.08715e-06;ANN=A|missense_variant|MODERATE|YPL091W|YPL091W|transcript|TRANSCRIPT_YPL091W|pr…	GT:GQ:DP:FDP:RO:FRO:AO:FAO:AF:SAR:SAF:SRF:SRR:FSAR:FSAF:FSRF:FSRR	1/1:14:166:166:0:0:166:166:1:86:80:0:0:86:80:0:0
S000004526	YML061C	PIF1	Petite Integration Frequency	TST1 DNA helicase PIF1	DNA helicase, potent G-quadruplex DNA binder/unwinder	DNA helicase, potent G-quadruplex DNA binder/unwinder; possesses strand annealing activity; promotes DNA synthesis during break-induced replication; important for crossover recombination; translation from different start sites produces mitochondrial and nuclear forms; nuclear form is a catalytic inhibitor of telomerase; mitochondrial form involved in DNA repair and recombination; mutations affect…	859	97697.2	YML061C	chr13	154783	.	A	AT	1922.02	PASS	AF=1;AO=125;DP=141;FAO=133;FDP=133;FR=.;FRO=0;FSAF=84;FSAR=49;FSRF=0;FSRR=0;FWDB=-0.00998916;FXX=0.029195;HRUN=1;LEN=1;MLLD=24.6223;OALT=T;OID=.;OMAPALT=AT;OPOS=154784;OREF=-;QD=57.8053;RBI=0.0721117;REFB=0;REVB=-0.0714165;RO=11;SAF=82;SAR=43;SRF=5;SRR=6;SSEN=0;SSEP=0;SSSB=0.0337901;STB=0.5;STBP=1;TYPE=ins;VARB=-0.000432599;ANN=AT|frameshift_variant|HIGH|YML061C|YML061C|transcript|TRANSCRIPT_YML0…	GT:GQ:DP:FDP:RO:FRO:AO:FAO:AF:SAR:SAF:SRF:SRR:FSAR:FSAF:FSRF:FSRR	1/1:11:141:133:11:0:125:133:1:43:82:5:6:49:84:0:0
S000004022	YLR032W	RAD5	RADiation sensitive	REV2 SNM2 DNA helicase RAD5	DNA helicase/Ubiquitin ligase	DNA helicase/Ubiquitin ligase; involved in error-free DNA damage tolerance (DDT), replication fork regression during postreplication repair by template switching, error-prone translesion synthesis; promotes synthesis of free and PCNA-bound polyubiquitin chains by Ubc13p-Mms2p; forms nuclear foci upon DNA replication stress; associates with native telomeres, cooperates with homologous recombinatio…	1169	133990	YLR032W	chr12	207517	.	G	A	1789.01	PASS	AF=1;AO=118;DP=118;FAO=117;FDP=117;FR=.;FRO=0;FSAF=70;FSAR=47;FSRF=0;FSRR=0;FWDB=-0.0186278;FXX=0.00847386;HRUN=4;LEN=1;MLLD=342.758;OALT=A;OID=.;OMAPALT=A;OPOS=207517;OREF=G;QD=61.1628;RBI=0.0290022;REFB=0;REVB=0.0222292;RO=0;SAF=71;SAR=47;SRF=0;SRR=0;SSEN=0;SSEP=0;SSSB=3.14664e-08;STB=0.5;STBP=1;TYPE=snp;VARB=1.34097e-06;ANN=A|missense_variant|MODERATE|YLR032W|YLR032W|transcript|TRANSCRIPT_YLR0…	GT:GQ:DP:FDP:RO:FRO:AO:FAO:AF:SAR:SAF:SRF:SRR:FSAR:FSAF:FSRF:FSRR	1/1:10:118:117:0:0:118:117:1:47:71:0:0:47:70:0:0
S000002317	YDL158C	None	None	None	Dubious open reading frame	Dubious open reading frame; unlikely to encode a functional protein, based on available experimental and comparative sequence data	102	11990.5	YDL158C	chr04	175777	.	A	G	2292.8	PASS	AF=1;AO=144;DP=144;FAO=144;FDP=144;FR=.;FRO=0;FSAF=65;FSAR=79;FSRF=0;FSRR=0;FWDB=0.0452036;FXX=0;HRUN=4;LEN=1;MLLD=167.855;OALT=G;OID=.;OMAPALT=G;OPOS=175777;OREF=A;QD=63.6888;RBI=0.0474359;REFB=0;REVB=0.0143804;RO=0;SAF=65;SAR=79;SRF=0;SRR=0;SSEN=0;SSEP=0;SSSB=4.10363e-08;STB=0.5;STBP=1;TYPE=snp;VARB=3.77699e-05;ANN=G|missense_variant|MODERATE|YDL158C|YDL158C|transcript|TRANSCRIPT_YDL158C|protei…	GT:GQ:DP:FDP:RO:FRO:AO:FAO:AF:SAR:SAF:SRF:SRR:FSAR:FSAF:FSRF:FSRR	1/1:12:144:144:0:0:144:144:1:79:65:0:0:79:65:0:0
S000001260	YHR217C	None	None	None	Dubious open reading frame	Dubious open reading frame; unlikely to encode a functional protein, based on available experimental and comparative sequence data; located in the telomeric region TEL08R	153	17082.8	YHR217C	chr08	555107	.	AT	A,AA	959.817	PASS	AF=1,0;AO=59,4;DP=65;FAO=65,0;FDP=65;FR=.;FRO=0;FSAF=31,0;FSAR=34,0;FSRF=0;FSRR=0;FWDB=-0.00600743,-0.00654211;FXX=0.0714184;HRUN=1,1;LEN=1,1;MLLD=220.043,192.462;OALT=-,A;OID=.,.;OMAPALT=A,AA;OPOS=555108,555108;OREF=T,T;QD=59.0657;RBI=0.0465635,0.0485736;REFB=0,0;REVB=0.0461743,0.048131;RO=0;SAF=30,0;SAR=29,4;SRF=0;SRR=0;SSEN=0,0;SSEP=0,0;SSSB=0,0;STB=0.5,0.5;STBP=1,1;TYPE=del,snp;VARB=0.0001859…	GT:GQ:DP:FDP:RO:FRO:AO:FAO:AF:SAR:SAF:SRF:SRR:FSAR:FSAF:FSRF:FSRR	1/1:5:65:65:0:0:59,4:65,0:1,0:29,4:30,0:0:0:34,0:31,0:0:0
S000007240	YGR122C-A	None	None	None	Dubious open reading frame	Dubious open reading frame; unlikely to encode a functional protein, based on available experimental and comparative sequence data; similar to YLR334C and YOL106W	42	4633.3	YGR122C-A	chr07	744236	.	T	C	801.229	PASS	AF=1;AO=56;DP=56;FAO=56;FDP=56;FR=.;FRO=0;FSAF=28;FSAR=28;FSRF=0;FSRR=0;FWDB=0.014347;FXX=0;HRUN=1;LEN=1;MLLD=139.304;OALT=C;OID=.;OMAPALT=C;OPOS=744236;OREF=T;QD=57.2306;RBI=0.0419267;REFB=0;REVB=0.0393955;RO=0;SAF=28;SAR=28;SRF=0;SRR=0;SSEN=0;SSEP=0;SSSB=0;STB=0.5;STBP=1;TYPE=snp;VARB=0.000205408;ANN=C|missense_variant|MODERATE|YGR122C-A|YGR122C-A|transcript|TRANSCRIPT_YGR122C-A|protein_coding|…	GT:GQ:DP:FDP:RO:FRO:AO:FAO:AF:SAR:SAF:SRF:SRR:FSAR:FSAF:FSRF:FSRR	1/1:4:56:56:0:0:56:56:1:28:28:0:0:28:28:0:0
S000007240	YGR122C-A	None	None	None	Dubious open reading frame	Dubious open reading frame; unlikely to encode a functional protein, based on available experimental and comparative sequence data; similar to YLR334C and YOL106W	42	4633.3	YGR122C-A	chr07	744246	.	A	T	851.253	PASS	AF=1;AO=59;DP=59;FAO=59;FDP=59;FR=.;FRO=0;FSAF=31;FSAR=28;FSRF=0;FSRR=0;FWDB=0.032825;FXX=0;HRUN=1;LEN=1;MLLD=97.2015;OALT=T;OID=.;OMAPALT=T;OPOS=744246;OREF=A;QD=57.7121;RBI=0.0360939;REFB=0;REVB=0.0150096;RO=0;SAF=31;SAR=28;SRF=0;SRR=0;SSEN=0;SSEP=0;SSSB=0;STB=0.5;STBP=1;TYPE=snp;VARB=0.000396936;ANN=T|stop_gained|HIGH|YGR122C-A|YGR122C-A|transcript|TRANSCRIPT_YGR122C-A|protein_coding|1/1|c.21T…	GT:GQ:DP:FDP:RO:FRO:AO:FAO:AF:SAR:SAF:SRF:SRR:FSAR:FSAF:FSRF:FSRR	1/1:5:59:59:0:0:59:59:1:28:31:0:0:28:31:0:0
S000007240	YGR122C-A	None	None	None	Dubious open reading frame	Dubious open reading frame; unlikely to encode a functional protein, based on available experimental and comparative sequence data; similar to YLR334C and YOL106W	42	4633.3	YGR122C-A	chr07	744250	.	A	G	885.737	PASS	AF=1;AO=60;DP=60;FAO=61;FDP=61;FR=.;FRO=0;FSAF=32;FSAR=29;FSRF=0;FSRR=0;FWDB=0.000121035;FXX=0;HRUN=1;LEN=1;MLLD=328.737;OALT=G;OID=.;OMAPALT=G;OPOS=744250;OREF=A;QD=58.0811;RBI=0.0209221;REFB=0;REVB=0.0209217;RO=0;SAF=32;SAR=28;SRF=0;SRR=0;SSEN=0;SSEP=0;SSSB=0;STB=0.5;STBP=1;TYPE=snp;VARB=2.00408e-05;ANN=G|missense_variant|MODERATE|YGR122C-A|YGR122C-A|transcript|TRANSCRIPT_YGR122C-A|protein_codi…	GT:GQ:DP:FDP:RO:FRO:AO:FAO:AF:SAR:SAF:SRF:SRR:FSAR:FSAF:FSRF:FSRR	1/1:5:60:61:0:0:60:61:1:28:32:0:0:29:32:0:0
S000000922	YER120W	SCS2	Suppressor of Choline Sensitivity	phosphatidylinositol-binding protein SCS2	Integral ER membrane protein, regulates phospholipid metabolism	Integral ER membrane protein, regulates phospholipid metabolism; one of 6 proteins (Ist2p, Scs2p, Scs22p, Tcb1p, Tcb2p, Tcb3p) that connect ER to plasma membrane (PM) and regulate PI4P levels by controlling access of Sac1p phosphatase to substrate PI4P in the PM; interacts with FFAT motifs in Opi1p, Swh1p, Osh2p, and Osh3p; involved in telomeric silencing; VAP homolog; SCS2 has a paralog, SCS22, …	244	26915.7	YER120W	chr05	401702	.	G	GA	3048.94	PASS	AF=1;AO=225;DP=259;FAO=248;FDP=248;FR=.;FRO=0;FSAF=126;FSAR=122;FSRF=0;FSRR=0;FWDB=0.164014;FXX=0;HRUN=3;LEN=1;MLLD=16.1687;OALT=A;OID=.;OMAPALT=GA;OPOS=401703;OREF=-;QD=49.1765;RBI=0.166225;REFB=0;REVB=0.0270168;RO=30;SAF=113;SAR=112;SRF=15;SRR=15;SSEN=0;SSEP=0;SSSB=0.000495572;STB=0.5;STBP=1;TYPE=ins;VARB=0.00193269;ANN=GA|frameshift_variant|HIGH|YER120W|YER120W|transcript|TRANSCRIPT_YER120W|pr…	GT:GQ:DP:FDP:RO:FRO:AO:FAO:AF:SAR:SAF:SRF:SRR:FSAR:FSAF:FSRF:FSRR	1/1:17:259:248:30:0:225:248:1:112:113:15:15:122:126:0:0
S000001796	YKR088C	TVP38	Tlg2-Vesicle Protein	None	Integral membrane protein	Integral membrane protein; localized to late Golgi vesicles along with the v-SNARE Tlg2p; required for asymmetric localization of Kar9p during mitosis; GFP-fusion protein localizes to the cytoplasm in a punctate pattern	337	38307.7	YKR088C	chr11	614053	.	C	T	2884.97	PASS	AF=1;AO=183;DP=183;FAO=183;FDP=183;FR=.;FRO=0;FSAF=98;FSAR=85;FSRF=0;FSRR=0;FWDB=0.0155513;FXX=0;HRUN=1;LEN=1;MLLD=142.155;OALT=T;OID=.;OMAPALT=T;OPOS=614053;OREF=C;QD=63.0596;RBI=0.0260295;REFB=0;REVB=0.0208733;RO=0;SAF=98;SAR=85;SRF=0;SRR=0;SSEN=0;SSEP=0;SSSB=-5.07612e-08;STB=0.5;STBP=1;TYPE=snp;VARB=6.25368e-05;ANN=T|missense_variant|MODERATE|YKR088C|YKR088C|transcript|TRANSCRIPT_YKR088C|prote…	GT:GQ:DP:FDP:RO:FRO:AO:FAO:AF:SAR:SAF:SRF:SRR:FSAR:FSAF:FSRF:FSRR	1/1:16:183:183:0:0:183:183:1:85:98:0:0:85:98:0:0
S000006046	YPL125W	KAP120	KAryoPherin	LPH2	Karyopherin responsible for the nuclear import of Rpf1p	Karyopherin responsible for the nuclear import of Rpf1p; Rpf1p is a ribosome maturation factor	1032	119592	YPL125W	chr16	313743	.	G	GA	2726.14	PASS	AF=1;AO=177;DP=189;FAO=182;FDP=182;FR=.;FRO=0;FSAF=87;FSAR=95;FSRF=0;FSRR=0;FWDB=0.108562;FXX=0.0162153;HRUN=1;LEN=1;MLLD=26.0243;OALT=A;OID=.;OMAPALT=GA;OPOS=313744;OREF=-;QD=59.9151;RBI=0.112632;REFB=0;REVB=0.0300028;RO=7;SAF=86;SAR=91;SRF=2;SRR=5;SSEN=0;SSEP=0;SSSB=0.0144968;STB=0.5;STBP=1;TYPE=ins;VARB=0.00107892;ANN=GA|frameshift_variant|HIGH|YPL125W|YPL125W|transcript|TRANSCRIPT_YPL125W|pro…	GT:GQ:DP:FDP:RO:FRO:AO:FAO:AF:SAR:SAF:SRF:SRR:FSAR:FSAF:FSRF:FSRR	1/1:15:189:182:7:0:177:182:1:91:86:2:5:95:87:0:0
S000005116	YNL172W	APC1	Anaphase Promoting Complex subunit	anaphase promoting complex subunit 1	Largest subunit of the Anaphase-Promoting Complex/Cyclosome	Largest subunit of the Anaphase-Promoting Complex/Cyclosome; APC/C is a ubiquitin-protein ligase required for degradation of anaphase inhibitors, including mitotic cyclins, during the metaphase/anaphase transition; component of the platform domain of the APC/C, based on structural analysis; localizes to nuclear foci that become diffuse upon DNA replication stress	1748	196133	YNL172W	chr14	338964	.	A	AT	2247.27	PASS	AF=1;AO=158;DP=174;FAO=171;FDP=171;FR=.;FRO=0;FSAF=83;FSAR=88;FSRF=0;FSRR=0;FWDB=0.182069;FXX=0;HRUN=3;LEN=1;MLLD=21.1678;OALT=T;OID=.;OMAPALT=AT;OPOS=338965;OREF=-;QD=52.5677;RBI=0.182311;REFB=0;REVB=0.00938639;RO=14;SAF=78;SAR=80;SRF=6;SRR=8;SSEN=0;SSEP=0;SSSB=0.0100515;STB=0.5;STBP=1;TYPE=ins;VARB=0.00263372;ANN=AT|frameshift_variant|HIGH|YNL172W|YNL172W|transcript|TRANSCRIPT_YNL172W|protein_c…	GT:GQ:DP:FDP:RO:FRO:AO:FAO:AF:SAR:SAF:SRF:SRR:FSAR:FSAF:FSRF:FSRR	1/1:13:174:171:14:0:158:171:1:80:78:6:8:88:83:0:0
S000000059	YAL063C	FLO9	FLOcculation	flocculin FLO9	Lectin-like protein with similarity to Flo1p	Lectin-like protein with similarity to Flo1p; thought to be expressed and involved in flocculation	1322	138013	YAL063C	chr01	33889	.	C	T	3931.7	PASS	AF=1;AO=242;DP=242;FAO=246;FDP=246;FR=.;FRO=0;FSAF=115;FSAR=131;FSRF=0;FSRR=0;FWDB=0.00884356;FXX=0;HRUN=1;LEN=1;MLLD=319.072;OALT=T;OID=.;OMAPALT=T;OPOS=33889;OREF=C;QD=63.9301;RBI=0.0140336;REFB=0;REVB=-0.0108965;RO=0;SAF=111;SAR=131;SRF=0;SRR=0;SSEN=0;SSEP=0;SSSB=-5.83332e-08;STB=0.5;STBP=1;TYPE=snp;VARB=-7.00888e-07;ANN=T|missense_variant|MODERATE|YAL063C|YAL063C|transcript|TRANSCRIPT_YAL063C…	GT:GQ:DP:FDP:RO:FRO:AO:FAO:AF:SAR:SAF:SRF:SRR:FSAR:FSAF:FSRF:FSRR	1/1:21:242:246:0:0:242:246:1:131:111:0:0:131:115:0:0
S000001292	YIL030C	SSM4	Suppressor of mrna Stability Mutant	KIS3 E3 ubiquitin-protein ligase SSM4 DOA10	Membrane-embedded ubiquitin-protein ligase	Membrane-embedded ubiquitin-protein ligase; ER and inner nuclear membrane localized RING-CH domain E3 ligase involved in ER-associated protein degradation (ERAD); targets misfolded cytosolic/nucleoplasmic domains of soluble and membrane embedded proteins (ERAD-C) and a transmembrane domain containing substrate (ERAD-M), Sbh2p; C-terminal element (CTE), conserved in human ortholog MARCH10/TEB4, de…	1319	151436	YIL030C	chr09	300777	.	C	T	3724.72	PASS	AF=1;AO=234;DP=234;FAO=235;FDP=235;FR=.;FRO=0;FSAF=116;FSAR=119;FSRF=0;FSRR=0;FWDB=-0.060685;FXX=0;HRUN=2;LEN=1;MLLD=63.3005;OALT=T;OID=.;OMAPALT=T;OPOS=300777;OREF=C;QD=63.3995;RBI=0.0666622;REFB=0;REVB=0.0275896;RO=0;SAF=116;SAR=118;SRF=0;SRR=0;SSEN=0;SSEP=0;SSSB=0;STB=0.5;STBP=1;TYPE=snp;VARB=-9.16902e-05;ANN=T|missense_variant|MODERATE|YIL030C|YIL030C|transcript|TRANSCRIPT_YIL030C|protein_cod…	GT:GQ:DP:FDP:RO:FRO:AO:FAO:AF:SAR:SAF:SRF:SRR:FSAR:FSAF:FSRF:FSRR	1/1:20:234:235:0:0:234:235:1:118:116:0:0:119:116:0:0
S000003578	YJL042W	MHP1	MAP-Homologous Protein	None	Microtubule-associated protein involved in microtubule organization	Microtubule-associated protein involved in microtubule organization; involved in assembly and stabilization of microtubules; overproduction results in cell cycle arrest at G2 phase; similar to Drosophila protein MAP and to mammalian MAP4 proteins	1398	155204	YJL042W	chr10	375458	.	G	A	1931.08	PASS	AF=1;AO=117;DP=125;FAO=125;FDP=125;FR=.,HEALED;FRO=0;FSAF=62;FSAR=63;FSRF=0;FSRR=0;FWDB=0.0292111;FXX=0;HRUN=1;LEN=1;MLLD=352.544;OALT=A;OID=.;OMAPALT=A;OPOS=375458;OREF=G;QD=61.7945;RBI=0.0293441;REFB=0;REVB=-0.00279074;RO=0;SAF=54;SAR=63;SRF=0;SRR=0;SSEN=0;SSEP=0;SSSB=0;STB=0.5;STBP=1;TYPE=snp;VARB=5.2034e-05;ANN=A|missense_variant|MODERATE|YJL042W|YJL042W|transcript|TRANSCRIPT_YJL042W|protein_…	GT:GQ:DP:FDP:RO:FRO:AO:FAO:AF:SAR:SAF:SRF:SRR:FSAR:FSAF:FSRF:FSRR	1/1:10:125:125:0:0:117:125:1:63:54:0:0:63:62:0:0
S000007273	Q0120	BI4	None	intron-encoded RNA maturase bI4	Mitochondrial mRNA maturase	Mitochondrial mRNA maturase; forms a complex with Nam2p to mediate splicing of the bI4 intron of the COB gene; encoded by both exon and intron sequences of partially processed COB mRNA	638	74618	Q0120	chrm	63765	.	G	A	23650.1	PASS	AF=1;AO=1182;DP=1511;FAO=1502;FDP=1502;FR=.,HEALED;FRO=0;FSAF=759;FSAR=743;FSRF=0;FSRR=0;FWDB=0.0537569;FXX=0.00595628;HRUN=1;LEN=1;MLLD=212.664;OALT=A;OID=.;OMAPALT=A;OPOS=63765;OREF=G;QD=62.983;RBI=0.0819978;REFB=0;REVB=0.0619179;RO=0;SAF=552;SAR=630;SRF=0;SRR=0;SSEN=0;SSEP=0;SSSB=0;STB=0.5;STBP=1;TYPE=snp;VARB=0.00147319;ANN=A|missense_variant|MODERATE|Q0120|Q0120|transcript|TRANSCRIPT_Q0120|p…	GT:GQ:DP:FDP:RO:FRO:AO:FAO:AF:SAR:SAF:SRF:SRR:FSAR:FSAF:FSRF:FSRR	1/1:130:1511:1502:0:0:1182:1502:1:630:552:0:0:743:759:0:0
S000001800	YKR092C	SRP40	Serine Rich Protein	None	Nucleolar serine-rich protein	Nucleolar serine-rich protein; role in preribosome assembly or transport; may function as a chaperone of small nucleolar ribonucleoprotein particles (snoRNPs); immunologically and structurally to rat Nopp140	406	40971.7	YKR092C	chr11	622631	.	ACTGCAGTCACTGCTGTCACTGCTG	A	1721.65	PASS	AF=1;AO=112;DP=117;FAO=112;FDP=112;FR=.;FRO=0;FSAF=49;FSAR=63;FSRF=0;FSRR=0;FWDB=0.0332961;FXX=0.0666611;HRUN=1;LEN=24;MLLD=795.99;OALT=-;OID=.;OMAPALT=A;OPOS=622632;OREF=CTGCAGTCACTGCTGTCACTGCTG;QD=61.4874;RBI=0.0432807;REFB=0;REVB=0.0276513;RO=0;SAF=48;SAR=64;SRF=0;SRR=0;SSEN=0;SSEP=0;SSSB=-3.41465e-08;STB=0.5;STBP=1;TYPE=del;VARB=2.9316e-05;ANN=A|disruptive_inframe_deletion|MODERATE|YKR092C|YK…	GT:GQ:DP:FDP:RO:FRO:AO:FAO:AF:SAR:SAF:SRF:SRR:FSAR:FSAF:FSRF:FSRR	1/1:9:117:112:0:0:112:112:1:64:48:0:0:63:49:0:0
S000001800	YKR092C	SRP40	Serine Rich Protein	None	Nucleolar serine-rich protein	Nucleolar serine-rich protein; role in preribosome assembly or transport; may function as a chaperone of small nucleolar ribonucleoprotein particles (snoRNPs); immunologically and structurally to rat Nopp140	406	40971.7	YKR092C	chr11	622678	.	G	A	2421.01	PASS	AF=1;AO=158;DP=158;FAO=158;FDP=158;FR=.;FRO=0;FSAF=66;FSAR=92;FSRF=0;FSRR=0;FWDB=0.0598239;FXX=0;HRUN=2;LEN=1;MLLD=65.0444;OALT=A;OID=.;OMAPALT=A;OPOS=622678;OREF=G;QD=61.2913;RBI=0.0793115;REFB=0;REVB=-0.0520713;RO=0;SAF=66;SAR=92;SRF=0;SRR=0;SSEN=0;SSEP=0;SSSB=0;STB=0.5;STBP=1;TYPE=snp;VARB=3.7532e-05;ANN=A|missense_variant|MODERATE|YKR092C|YKR092C|transcript|TRANSCRIPT_YKR092C|protein_coding|1…	GT:GQ:DP:FDP:RO:FRO:AO:FAO:AF:SAR:SAF:SRF:SRR:FSAR:FSAF:FSRF:FSRR	1/1:13:158:158:0:0:158:158:1:92:66:0:0:92:66:0:0
S000005020	YNL076W	MKS1	Multicopy Kinase Suppressor	LYS80	Pleiotropic negative transcriptional regulator	Pleiotropic negative transcriptional regulator; involved in Ras-CAMP and lysine biosynthetic pathways and nitrogen regulation; involved in retrograde (RTG) mitochondria-to-nucleus signaling	584	65656.6	YNL076W	chr14	508130	.	C	T	3763.67	PASS	AF=1;AO=236;DP=236;FAO=237;FDP=237;FR=.;FRO=0;FSAF=122;FSAR=115;FSRF=0;FSRR=0;FWDB=0.0007999;FXX=0;HRUN=1;LEN=1;MLLD=149.283;OALT=T;OID=.;OMAPALT=T;OPOS=508130;OREF=C;QD=63.5219;RBI=0.0226532;REFB=0;REVB=-0.0226391;RO=0;SAF=121;SAR=115;SRF=0;SRR=0;SSEN=0;SSEP=0;SSSB=0;STB=0.5;STBP=1;TYPE=snp;VARB=-2.23366e-05;ANN=T|missense_variant|MODERATE|YNL076W|YNL076W|transcript|TRANSCRIPT_YNL076W|protein_co…	GT:GQ:DP:FDP:RO:FRO:AO:FAO:AF:SAR:SAF:SRF:SRR:FSAR:FSAF:FSRF:FSRR	1/1:20:236:237:0:0:236:237:1:115:121:0:0:115:122:0:0
S000005875	YOR348C	PUT4	Proline UTilization	proline permease PUT4	Proline permease	Proline permease; required for high-affinity transport of proline; also transports the toxic proline analog azetidine-2-carboxylate (AzC); PUT4 transcription is repressed in ammonia-grown cells	627	68789.1	YOR348C	chr15	987144	.	C	A	2398.23	PASS	AF=1;AO=112;DP=149;FAO=149;FDP=149;FR=.,HEALED;FRO=0;FSAF=70;FSAR=79;FSRF=0;FSRR=0;FWDB=0.0806366;FXX=0;HRUN=1;LEN=1;MLLD=244.469;OALT=A;OID=.;OMAPALT=A;OPOS=987144;OREF=C;QD=64.382;RBI=0.0810273;REFB=0;REVB=0.00794754;RO=0;SAF=34;SAR=78;SRF=0;SRR=0;SSEN=0;SSEP=0;SSSB=-3.95543e-08;STB=0.5;STBP=1;TYPE=snp;VARB=0.000271592;ANN=A|missense_variant|MODERATE|YOR348C|YOR348C|transcript|TRANSCRIPT_YOR348…	GT:GQ:DP:FDP:RO:FRO:AO:FAO:AF:SAR:SAF:SRF:SRR:FSAR:FSAF:FSRF:FSRR	1/1:13:149:149:0:0:112:149:1:78:34:0:0:79:70:0:0
S000000420	YBR216C	YBP1	Yap1-Binding Protein	None	Protein involved in cellular response to oxidative stress	Protein involved in cellular response to oxidative stress; required for oxidation of specific cysteine residues of transcription factor Yap1p, resulting in nuclear localization of Yap1p in response to stress; YBP1 has a paralog, YBP2, that arose from the whole genome duplication	674	77730.1	YBR216C	chr02	663081	.	A	AG,AGG	1675.68	PASS	AF=1,0;AO=153,11;DP=180;FAO=177,0;FDP=177;FR=.;FRO=0;FSAF=84,0;FSAR=93,0;FSRF=0;FSRR=0;FWDB=-0.0750832,-0.03782;FXX=0.00561766;HRUN=5,5;LEN=1,2;MLLD=12.6189,8.10129;OALT=G,GG;OID=.,.;OMAPALT=AG,AGG;OPOS=663082,663082;OREF=-,-;QD=37.8685;RBI=0.0886753,0.045193;REFB=0.0626336,0.054081;REVB=-0.0471786,-0.0247397;RO=16;SAF=73,5;SAR=80,6;SRF=8;SRR=8;SSEN=0,0;SSEP=0,0;SSSB=-0.00411131,-0.0457182;STB=0.…	GT:GQ:DP:FDP:RO:FRO:AO:FAO:AF:SAR:SAF:SRF:SRR:FSAR:FSAF:FSRF:FSRR	1/1:5:180:177:16:0:153,11:177,0:1,0:80,6:73,5:8:8:93,0:84,0:0:0
S000004238	YLR248W	RCK2	Radiation sensitivity Complementing Kinase	serine/threonine protein kinase RCK2 CLK1 CMK3	Protein kinase involved in response to oxidative and osmotic stress	Protein kinase involved in response to oxidative and osmotic stress; identified as suppressor of S. pombe cell cycle checkpoint mutations; similar to CaM (calmodulin) kinases; RCK2 has a paralog, RCK1, that arose from the whole genome duplication	610	68043.1	YLR248W	chr12	631993	.	G	A	1901.79	PASS	AF=1;AO=116;DP=124;FAO=123;FDP=123;FR=.,HEALED;FRO=0;FSAF=69;FSAR=54;FSRF=0;FSRR=0;FWDB=0.0410015;FXX=0.00806387;HRUN=1;LEN=1;MLLD=129.14;OALT=A;OID=.;OMAPALT=A;OPOS=631993;OREF=G;QD=61.847;RBI=0.0415825;REFB=0;REVB=-0.00692669;RO=0;SAF=62;SAR=54;SRF=0;SRR=0;SSEN=0;SSEP=0;SSSB=3.13529e-08;STB=0.5;STBP=1;TYPE=snp;VARB=0.00018922;ANN=A|missense_variant|MODERATE|YLR248W|YLR248W|transcript|TRANSCRIPT…	GT:GQ:DP:FDP:RO:FRO:AO:FAO:AF:SAR:SAF:SRF:SRR:FSAR:FSAF:FSRF:FSRR	1/1:10:124:123:0:0:116:123:1:54:62:0:0:54:69:0:0
S000004428	YLR436C	ECM30	ExtraCellular Mutant	None	Protein of unknown function	Protein of unknown function; may play a role in cell wall biosynthesis, mutants have abormal relative levels of mannose and glucose and have Gap1p sorting and transport defects; (GFP)-fusion protein localizes to the cytoplasm	1274	145053	YLR436C	chr12	1004866	.	C	CA	2467.77	PASS	AF=1;AO=160;DP=165;FAO=163;FDP=163;FR=.;FRO=0;FSAF=76;FSAR=87;FSRF=0;FSRR=0;FWDB=0.117014;FXX=0.00609719;HRUN=1;LEN=1;MLLD=29.6561;OALT=A;OID=.;OMAPALT=CA;OPOS=1004867;OREF=-;QD=60.5588;RBI=0.132952;REFB=0;REVB=-0.0631182;RO=3;SAF=74;SAR=86;SRF=2;SRR=1;SSEN=0;SSEP=0;SSSB=-0.00718399;STB=0.5;STBP=1;TYPE=ins;VARB=0.000452884;ANN=CA|frameshift_variant|HIGH|YLR436C|YLR436C|transcript|TRANSCRIPT_YLR43…	GT:GQ:DP:FDP:RO:FRO:AO:FAO:AF:SAR:SAF:SRF:SRR:FSAR:FSAF:FSRF:FSRR	1/1:14:165:163:3:0:160:163:1:86:74:2:1:87:76:0:0
S000004384	YLR392C	ART10	Arrestin-Related Trafficking adaptors	None	Protein of unknown function that contains 2 PY motifs	Protein of unknown function that contains 2 PY motifs; ubiquinated by Rsp5p; overexpression confers resistance to arsenite; green fluorescent protein (GFP)-fusion protein localizes it to the cytoplasm; non-essential gene	518	59765.9	YLR392C	chr12	898418	.	T	A	3420.04	PASS	AF=1;AO=214;DP=215;FAO=220;FDP=220;FR=.;FRO=0;FSAF=109;FSAR=111;FSRF=0;FSRR=0;FWDB=0.00570991;FXX=0.00452468;HRUN=1;LEN=1;MLLD=291.428;OALT=A;OID=.;OMAPALT=A;OPOS=898418;OREF=T;QD=62.1825;RBI=0.0224358;REFB=-0.0594167;REVB=0.0216971;RO=1;SAF=105;SAR=109;SRF=1;SRR=0;SSEN=0;SSEP=0;SSSB=-0.00451581;STB=0.5;STBP=1;TYPE=snp;VARB=0.000169267;ANN=A|missense_variant|MODERATE|YLR392C|YLR392C|transcript|TR…	GT:GQ:DP:FDP:RO:FRO:AO:FAO:AF:SAR:SAF:SRF:SRR:FSAR:FSAF:FSRF:FSRR	1/1:14:215:220:1:0:214:220:1:109:105:1:0:111:109:0:0
S000000479	YBR275C	RIF1	RAP1-Interacting Factor	DNA-binding protein RIF1	Protein that binds to the Rap1p C-terminus	Protein that binds to the Rap1p C-terminus; acts synergistically with Rif2p to help control telomere length and establish telomeric silencing; involved in control of DNA replication; contributes to resection of DNA double strand breaks (DSBs); deletion results in telomere elongation	1916	217912	YBR275C	chr02	758639	.	T	C	2808.56	PASS	AF=1;AO=179;DP=179;FAO=179;FDP=179;FR=.;FRO=0;FSAF=111;FSAR=68;FSRF=0;FSRR=0;FWDB=0.00352072;FXX=0;HRUN=2;LEN=1;MLLD=69.7715;OALT=C;OID=.;OMAPALT=C;OPOS=758639;OREF=T;QD=62.761;RBI=0.00754323;REFB=0;REVB=0.0066712;RO=0;SAF=111;SAR=68;SRF=0;SRR=0;SSEN=0;SSEP=0;SSSB=-5.60049e-08;STB=0.5;STBP=1;TYPE=snp;VARB=3.94539e-05;ANN=C|missense_variant|MODERATE|YBR275C|YBR275C|transcript|TRANSCRIPT_YBR275C|pr…	GT:GQ:DP:FDP:RO:FRO:AO:FAO:AF:SAR:SAF:SRF:SRR:FSAR:FSAF:FSRF:FSRR	1/1:15:179:179:0:0:179:179:1:68:111:0:0:68:111:0:0
S000004000	YLR010C	TEN1	TElomeric pathways with STn1	None	Protein that regulates telomeric length	Protein that regulates telomeric length; protects telomeric ends in a complex with Cdc13p and Stn1p; similar to human Ten1 which is critical for the telomeric function of the CST (Cdc13p-Stn1p-Ten1p) complex	160	18604.8	YLR010C	chr12	168497	.	A	AT	1978.52	PASS	AF=1;AO=129;DP=136;FAO=132;FDP=132;FR=.;FRO=0;FSAF=59;FSAR=73;FSRF=0;FSRR=0;FWDB=-0.0306958;FXX=0.0149243;HRUN=1;LEN=1;MLLD=27.3633;OALT=T;OID=.;OMAPALT=AT;OPOS=168498;OREF=-;QD=59.9553;RBI=0.0306962;REFB=0;REVB=0.00017363;RO=3;SAF=59;SAR=70;SRF=1;SRR=2;SSEN=0;SSEP=0;SSSB=0.00539685;STB=0.5;STBP=1;TYPE=ins;VARB=-8.18168e-05;ANN=AT|frameshift_variant|HIGH|YLR010C|YLR010C|transcript|TRANSCRIPT_YLR0…	GT:GQ:DP:FDP:RO:FRO:AO:FAO:AF:SAR:SAF:SRF:SRR:FSAR:FSAF:FSRF:FSRR	1/1:11:136:132:3:0:129:132:1:70:59:1:2:73:59:0:0
S000004936	YMR317W	None	None	None	Putative protein of unknown function	Putative protein of unknown function; has some similarity to sialidase from Trypanosoma; YMR317W is not an essential gene	1140	113166	YMR317W	chr13	916359	.	G	A	4003.99	PASS	AF=1;AO=257;DP=258;FAO=257;FDP=257;FR=.;FRO=0;FSAF=131;FSAR=126;FSRF=0;FSRR=0;FWDB=0.0128063;FXX=0.00387582;HRUN=1;LEN=1;MLLD=133.526;OALT=A;OID=.;OMAPALT=A;OPOS=916359;OREF=G;QD=62.3189;RBI=0.0237436;REFB=0;REVB=0.019994;RO=0;SAF=131;SAR=126;SRF=0;SRR=0;SSEN=0;SSEP=0;SSSB=0;STB=0.5;STBP=1;TYPE=snp;VARB=4.73454e-05;ANN=A|missense_variant|MODERATE|YMR317W|YMR317W|transcript|TRANSCRIPT_YMR317W|prot…	GT:GQ:DP:FDP:RO:FRO:AO:FAO:AF:SAR:SAF:SRF:SRR:FSAR:FSAF:FSRF:FSRR	1/1:22:258:257:0:0:257:257:1:126:131:0:0:126:131:0:0
S000004936	YMR317W	None	None	None	Putative protein of unknown function	Putative protein of unknown function; has some similarity to sialidase from Trypanosoma; YMR317W is not an essential gene	1140	113166	YMR317W	chr13	919133	.	A	AC,C	2741.56	PASS	AF=1,0;AO=186,7;DP=198;FAO=176,0;FDP=176;FR=.;FRO=0;FSAF=94,0;FSAR=82,0;FSRF=0;FSRR=0;FWDB=-0.00527001,-0.00638646;FXX=0.0056494;HRUN=0,6;LEN=1,1;MLLD=201.439,171.533;OALT=C,C;OID=.,.;OMAPALT=AC,C;OPOS=919134,919133;OREF=-,A;QD=62.3081;RBI=0.00825107,0.00880825;REFB=0,0;REVB=-0.00634879,-0.00606617;RO=5;SAF=95,5;SAR=91,2;SRF=2;SRR=3;SSEN=0,0;SSEP=0,0;SSSB=0.0055186,0.237226;STB=0.5,0.5;STBP=1,1;T…	GT:GQ:DP:FDP:RO:FRO:AO:FAO:AF:SAR:SAF:SRF:SRR:FSAR:FSAF:FSRF:FSRR	1/1:15:198:176:5:0:186,7:176,0:1,0:91,2:95,5:2:3:82,0:94,0:0:0
S000003230	YGL261C	PAU11	seriPAUperin	seripauperin PAU11	Putative protein of unknown function	Putative protein of unknown function; member of the seripauperin multigene family encoded mainly in subtelomeric regions; mRNA expression appears to be regulated by SUT1 and UPC2	120	12846.7	YGL261C	chr07	8348	.	T	TC	204.921	PASS	AF=1;AO=2;DP=37;FAO=31;FDP=31;FR=.;FRO=0;FSAF=17;FSAR=14;FSRF=0;FSRR=0;FWDB=-0.0166123;FXX=0.162118;HRUN=1;LEN=1;MLLD=8.83318;OALT=C;OID=.;OMAPALT=TC;OPOS=8349;OREF=-;QD=26.4414;RBI=0.0523267;REFB=0;REVB=-0.0496197;RO=35;SAF=0;SAR=2;SRF=23;SRR=12;SSEN=0;SSEP=0;SSSB=-0.516944;STB=0.5;STBP=1;TYPE=ins;VARB=0.00194486;ANN=TC|frameshift_variant|HIGH|YGL261C|YGL261C|transcript|TRANSCRIPT_YGL261C|protei…	GT:GQ:DP:FDP:RO:FRO:AO:FAO:AF:SAR:SAF:SRF:SRR:FSAR:FSAF:FSRF:FSRR	0/1:3:37:31:35:0:2:31:1:2:0:23:12:14:17:0:0
S000003741	YJL206C	None	None	None	Putative protein of unknown function	Putative protein of unknown function; similar to transcriptional regulators from the Zn[2]-Cys[6] binuclear cluster protein family; mRNA is weakly cell cycle regulated, peaking in S phase; induced rapidly upon MMS treatment	758	86668.9	YJL206C	chr10	52598	.	CTT	C,CT	755.201	PASS	AF=0,1;AO=19,79;DP=150;FAO=0,149;FDP=149;FR=.;FRO=0;FSAF=0,97;FSAR=0,52;FSRF=0;FSRR=0;FWDB=0.054952,0.108521;FXX=0.0387072;HRUN=8,8;LEN=2,1;MLLD=8.94011,6.52898;OALT=-,-;OID=.,.;OMAPALT=C,CT;OPOS=52599,52599;OREF=TT,T;QD=20.2739;RBI=0.13276,0.247886;REFB=0,0;REVB=0.120854,0.222869;RO=41;SAF=10,59;SAR=9,20;SRF=23;SRR=18;SSEN=0,0;SSEP=0,0;SSSB=-0.0401891,0.143076;STB=0.5,0.5;STBP=1,1;TYPE=del,del;V…	GT:GQ:DP:FDP:RO:FRO:AO:FAO:AF:SAR:SAF:SRF:SRR:FSAR:FSAF:FSRF:FSRR	2/2:5:150:149:41:0:19,79:0,149:0,1:9,20:10,59:23:18:0,52:0,97:0:0
S000001018	YHL026C	None	None	None	Putative protein of unknown function	Putative protein of unknown function; transcriptionally regulated by Upc2p via an upstream sterol response element; SWAT-GFP fusion protein localizes to the cell periphery, while mCherry fusion localizes to both the cell periphery and vacuole; YHL026C is not an essential gene; in 2005 the start site was moved 141 nt upstream (see Locus History)	315	35716.5	YHL026C	chr08	53776	.	T	C	3220	PASS	AF=1;AO=208;DP=208;FAO=208;FDP=208;FR=.;FRO=0;FSAF=115;FSAR=93;FSRF=0;FSRR=0;FWDB=0.000921674;FXX=0;HRUN=3;LEN=1;MLLD=214.767;OALT=C;OID=.;OMAPALT=C;OPOS=53776;OREF=T;QD=61.923;RBI=0.0114276;REFB=0;REVB=0.0113904;RO=0;SAF=115;SAR=93;SRF=0;SRR=0;SSEN=0;SSEP=0;SSSB=3.95947e-08;STB=0.5;STBP=1;TYPE=snp;VARB=8.39757e-06;ANN=C|missense_variant|MODERATE|YHL026C|YHL026C|transcript|TRANSCRIPT_YHL026C|prot…	GT:GQ:DP:FDP:RO:FRO:AO:FAO:AF:SAR:SAF:SRF:SRR:FSAR:FSAF:FSRF:FSRR	1/1:18:208:208:0:0:208:208:1:93:115:0:0:93:115:0:0
S000003977	YLL054C	None	None	None	Putative protein of unknown function with similarity to Pip2p	Putative protein of unknown function with similarity to Pip2p; an oleate-specific transcriptional activator of peroxisome proliferation; YLL054C is not an essential gene	843	97601	YLL054C	chr12	34586	.	AAATATTCCAAACTTAGAATGTCAGAATCTCCTTCTGGAATC	AA,A	672.612	PASS	AF=0,1;AO=2,44;DP=51;FAO=0,47;FDP=47;FR=.;FRO=0;FSAF=0,18;FSAR=0,29;FSRF=0;FSRR=0;FWDB=0.00543607,0.00630797;FXX=0.0961354;HRUN=3,3;LEN=40,41;MLLD=1200.48,1216.95;OALT=-,-;OID=.,.;OMAPALT=AA,A;OPOS=34588,34587;OREF=ATATTCCAAACTTAGAATGTCAGAATCTCCTTCTGGAATC,AATATTCCAAACTTAGAATGTCAGAATCTCCTTCTGGAATC;QD=57.2436;RBI=0.0092827,0.0092619;REFB=0,0;REVB=0.00752446,0.00678176;RO=0;SAF=2,16;SAR=0,28;SRF=0;S…	GT:GQ:DP:FDP:RO:FRO:AO:FAO:AF:SAR:SAF:SRF:SRR:FSAR:FSAF:FSRF:FSRR	2/2:4:51:47:0:0:2,44:0,47:0,1:0,28:2,16:0:0:0,29:0,18:0:0
S000001681	YKL198C	PTK1	Putative serine/Threonine protein Kinase	putative serine/threonine protein kinase PTK1 YKL199C YKT9 POT1 KKT8 STK1	Putative serine/threonine protein kinase	Putative serine/threonine protein kinase; regulates spermine uptake; involved in polyamine transport; possible mitochondrial protein; PTK1 has a paralog, PTK2, that arose from the whole genome duplication	662	73520.4	YKL198C	chr11	68407	.	AC	A	2255.42	PASS	AF=1;AO=144;DP=148;FAO=147;FDP=147;FR=.;FRO=0;FSAF=80;FSAR=67;FSRF=0;FSRR=0;FWDB=0.0345065;FXX=0.0067563;HRUN=2;LEN=1;MLLD=30.1931;OALT=-;OID=.;OMAPALT=A;OPOS=68408;OREF=C;QD=61.3721;RBI=0.115445;REFB=0;REVB=-0.110168;RO=2;SAF=77;SAR=67;SRF=2;SRR=0;SSEN=0;SSEP=0;SSSB=-0.0121902;STB=0.5;STBP=1;TYPE=del;VARB=-0.000447156;ANN=A|frameshift_variant|HIGH|YKL198C|YKL198C|transcript|TRANSCRIPT_YKL198C|pr…	GT:GQ:DP:FDP:RO:FRO:AO:FAO:AF:SAR:SAF:SRF:SRR:FSAR:FSAF:FSRF:FSRR	1/1:12:148:147:2:0:144:147:1:67:77:2:0:67:80:0:0
S000003329	YGR097W	ASK10	Activator of SKn7	RGC2	Regulator of the Fps1p glycerol channel	Regulator of the Fps1p glycerol channel; under nonstress conditions, binds to Fps1p to positively regulate glycerol transport; under osmotic stress, multiple phosphorylation by Hog1p causes Ask10p to dissociate from Fps1p; forms homodimers and heterodimerizes with paralog Rgc1p; phosphorylated in response to oxidative stress; has a role in destruction of Ssn8p; associates with RNA polymerase II h…	1146	126895	YGR097W	chr07	687198	.	C	CA	2594.18	PASS	AF=1;AO=165;DP=171;FAO=168;FDP=168;FR=.;FRO=0;FSAF=79;FSAR=89;FSRF=0;FSRR=0;FWDB=0.0117523;FXX=0.00591681;HRUN=0;LEN=1;MLLD=95.9963;OALT=A;OID=.;OMAPALT=CA;OPOS=687199;OREF=-;QD=61.7663;RBI=0.0125951;REFB=0;REVB=-0.00452997;RO=5;SAF=77;SAR=88;SRF=2;SRR=3;SSEN=0;SSEP=0;SSSB=0.0037462;STB=0.5;STBP=1;TYPE=ins;VARB=2.91479e-05;ANN=CA|frameshift_variant|HIGH|YGR097W|YGR097W|transcript|TRANSCRIPT_YGR09…	GT:GQ:DP:FDP:RO:FRO:AO:FAO:AF:SAR:SAF:SRF:SRR:FSAR:FSAF:FSRF:FSRR	1/1:14:171:168:5:0:165:168:1:88:77:2:3:89:79:0:0
S000003329	YGR097W	ASK10	Activator of SKn7	RGC2	Regulator of the Fps1p glycerol channel	Regulator of the Fps1p glycerol channel; under nonstress conditions, binds to Fps1p to positively regulate glycerol transport; under osmotic stress, multiple phosphorylation by Hog1p causes Ask10p to dissociate from Fps1p; forms homodimers and heterodimerizes with paralog Rgc1p; phosphorylated in response to oxidative stress; has a role in destruction of Ssn8p; associates with RNA polymerase II h…	1146	126895	YGR097W	chr07	688297	.	G	T	2743.73	PASS	AF=1;AO=175;DP=176;FAO=176;FDP=176;FR=.;FRO=0;FSAF=85;FSAR=91;FSRF=0;FSRR=0;FWDB=-0.0881098;FXX=0;HRUN=3;LEN=1;MLLD=62.6342;OALT=T;OID=.;OMAPALT=T;OPOS=688297;OREF=G;QD=62.3574;RBI=0.088226;REFB=0;REVB=-0.00452719;RO=0;SAF=84;SAR=91;SRF=0;SRR=0;SSEN=0;SSEP=0;SSSB=0;STB=0.5;STBP=1;TYPE=snp;VARB=-0.000343529;ANN=T|missense_variant|MODERATE|YGR097W|YGR097W|transcript|TRANSCRIPT_YGR097W|protein_codin…	GT:GQ:DP:FDP:RO:FRO:AO:FAO:AF:SAR:SAF:SRF:SRR:FSAR:FSAF:FSRF:FSRR	1/1:15:176:176:0:0:175:176:1:91:84:0:0:91:85:0:0
S000000120	YBL024W	NCL1	NuCLear protein	TRM4 tRNA (cytosine-C5-)-methyltransferase	S-adenosyl-L-methionine-dependent tRNA: m5C-methyltransferase	S-adenosyl-L-methionine-dependent tRNA: m5C-methyltransferase; methylates cytosine to m5C at several positions in tRNAs and intron-containing pre-tRNAs; increases proportion of tRNALeu(CAA) with m5C at wobble position in response to hydrogen peroxide, causing selective translation of mRNA from genes enriched in TTG codon; loss of NCL1 confers hypersensitivity to oxidative stress; similar to Nop2p…	684	77878.6	YBL024W	chr02	173734	.	GAA	GA,G	763.426	PASS	AF=1,0;AO=73,13;DP=119;FAO=117,0;FDP=117;FR=.;FRO=0;FSAF=85,0;FSAR=32,0;FSRF=0;FSRR=0;FWDB=0.198161,0.0991156;FXX=0.0487765;HRUN=5,5;LEN=1,2;MLLD=8.85461,9.97828;OALT=-,-;OID=.,.;OMAPALT=GA,G;OPOS=173735,173735;OREF=A,AA;QD=26.1;RBI=0.231996,0.120551;REFB=0,0;REVB=0.12064,0.0686196;RO=26;SAF=63,6;SAR=10,7;SRF=14;SRR=12;SSEN=0,0;SSEP=0,0;SSSB=0.263499,-0.0855449;STB=0.5,0.5;STBP=1,1;TYPE=del,del;V…	GT:GQ:DP:FDP:RO:FRO:AO:FAO:AF:SAR:SAF:SRF:SRR:FSAR:FSAF:FSRF:FSRR	1/1:4:119:117:26:0:73,13:117,0:1,0:10,7:63,6:14:12:32,0:85,0:0:0
S000004376	YLR384C	IKI3	Insensitive to KIller toxin	TOT1 ELP1 KTI7 Elongator subunit IKI3	Subunit of Elongator complex	Subunit of Elongator complex; Elongator is required for modification of wobble nucleosides in tRNA; maintains structural integrity of Elongator; homolog of human IKAP, mutations in which cause familial dysautonomia (FD)	1349	152930	YLR384C	chr12	882928	.	TC	CT,TCT,TCTT	1493.14	PASS	AF=0,1,0;AO=4,94,6;DP=111;FAO=0,109,0;FDP=109;FR=.;FRO=0;FSAF=0,60,0;FSAR=0,49,0;FSRF=0;FSRR=0;FWDB=-0.0240822,-0.0705698,-0.0359204;FXX=0.0180164;HRUN=5,1,1;LEN=2,1,2;MLLD=10.2121,23.9418,6.81513;OALT=CT,T,TT;OID=.,.,.;OMAPALT=CT,TCT,TCTT;OPOS=882928,882930,882930;OREF=TC,-,-;QD=54.7942;RBI=0.051514,0.0735017,0.0374223;REFB=0,0,0;REVB=0.0455383,0.0205525,0.0104954;RO=2;SAF=1,51,6;SAR=3,43,0;SRF=…	GT:GQ:DP:FDP:RO:FRO:AO:FAO:AF:SAR:SAF:SRF:SRR:FSAR:FSAF:FSRF:FSRR	2/2:9:111:109:2:0:4,94,6:0,109,0:0,1,0:3,43,0:1,51,6:0:2:0,49,0:0,60,0:0:0
S000006068	YPL147W	PXA1	PeroXisomal ABC-transporter	LPI1 PAL1 PAT2 SSH2 ATP-binding cassette long-chain fatty acid transporter PXA1	Subunit of heterodimeric peroxisomal ABC transport complex, with Pxa2p	Subunit of heterodimeric peroxisomal ABC transport complex, with Pxa2p; required for import of long-chain fatty acids into peroxisomes; similar to human adrenoleukodystrophy transporters ABCD1and ABCD2, and ALD-related proteins; mutations in ABCD1 cause X-linked adrenoleukodystrophy (X-ALD), a peroxisomal disorder; human ABCD1 and ABCD2 can each partially complement yeast pxa1 pxa2 double null mu…	870	100058	YPL147W	chr16	275245	.	A	AC	2425.99	PASS	AF=1;AO=157;DP=161;FAO=160;FDP=160;FR=.;FRO=0;FSAF=78;FSAR=82;FSRF=0;FSRR=0;FWDB=-0.0714554;FXX=0;HRUN=1;LEN=1;MLLD=31.7613;OALT=C;OID=.;OMAPALT=AC;OPOS=275246;OREF=-;QD=60.6497;RBI=0.0871645;REFB=0;REVB=0.0499178;RO=3;SAF=77;SAR=80;SRF=1;SRR=2;SSEN=0;SSEP=0;SSSB=0.00560571;STB=0.5;STBP=1;TYPE=ins;VARB=-0.000186589;ANN=AC|frameshift_variant|HIGH|YPL147W|YPL147W|transcript|TRANSCRIPT_YPL147W|prote…	GT:GQ:DP:FDP:RO:FRO:AO:FAO:AF:SAR:SAF:SRF:SRR:FSAR:FSAF:FSRF:FSRR	1/1:13:161:160:3:0:157:160:1:80:77:1:2:82:78:0:0
S000006235	YPR031W	NTO1	NuA Three Orf	None	Subunit of the NuA3 histone acetyltransferase complex	Subunit of the NuA3 histone acetyltransferase complex; this complex acetylates histone H3; contains PHD finger domain that interacts with methylated histone H3	748	86032.4	YPR031W	chr16	633350	.	ATT	A,AT	977.49	PASS	AF=0,1;AO=16,92;DP=160;FAO=0,158;FDP=158;FR=.;FRO=0;FSAF=0,66;FSAR=0,92;FSRF=0;FSRR=0;FWDB=0.119683,0.236523;FXX=0.0124992;HRUN=7,7;LEN=2,1;MLLD=9.14253,8.28896;OALT=-,-;OID=.,.;OMAPALT=A,AT;OPOS=633351,633351;OREF=TT,T;QD=24.7466;RBI=0.122224,0.239547;REFB=0,0;REVB=0.0247964,0.0379398;RO=46;SAF=1,49;SAR=15,43;SRF=15;SRR=31;SSEN=0,0;SSEP=0,0;SSSB=-0.521544,0.127321;STB=0.5,0.5;STBP=1,1;TYPE=del,d…	GT:GQ:DP:FDP:RO:FRO:AO:FAO:AF:SAR:SAF:SRF:SRR:FSAR:FSAF:FSRF:FSRR	2/2:5:160:158:46:0:16,92:0,158:0,1:15,43:1,49:15:31:0,92:0,66:0:0
S000002308	YDL149W	ATG9	AuTophaGy related	APG9 CVT6 autophagy protein ATG9 AUT9 CVT7	Transmembrane protein involved in forming Cvt and autophagic vesicles	Transmembrane protein involved in forming Cvt and autophagic vesicles; cycles between the phagophore assembly site (PAS) and other cytosolic punctate structures, not found in autophagosomes; may be involved in membrane delivery to the PAS	997	115383	YDL149W	chr04	188394	.	AGA	A,AA,AAA	1970.98	PASS	AF=0,1,0;AO=10,60,60;DP=130;FAO=0,129,0;FDP=129;FR=.;FRO=0;FSAF=0,75,0;FSAR=0,54,0;FSRF=0;FSRR=0;FWDB=0.00741919,-0.00048428,-0.00585559;FXX=0.015266;HRUN=1,1,1;LEN=2,1,1;MLLD=210.476,217.486,210.45;OALT=-,-,A;OID=.,.,.;OMAPALT=A,AA,AAA;OPOS=188395,188395,188395;OREF=GA,G,G;QD=61.1158;RBI=0.0137537,0.00170416,0.00905383;REFB=0,0,0;REVB=0.011581,0.0016339,-0.00690535;RO=0;SAF=10,32,33;SAR=0,28,27;…	GT:GQ:DP:FDP:RO:FRO:AO:FAO:AF:SAR:SAF:SRF:SRR:FSAR:FSAF:FSRF:FSRR	2/2:11:130:129:0:0:10,60,60:0,129,0:0,1,0:0,28,27:10,32,33:0:0:0,54,0:0,75,0:0:0
S000001871	YFL023W	BUD27	BUD site selection	URI1	Unconventional prefoldin protein involved in translation initiation	Unconventional prefoldin protein involved in translation initiation; required for correct assembly of RNAP I, II, and III in an Rpb5p-dependent manner; shuttles between nucleus and cytoplasm; mutants have inappropriate expression of nutrient sensitive genes due to translational derepression of Gcn4p transcription factor; diploid mutants show random budding; ortholog of human URI/RMP	796	91351.3	YFL023W	chr06	94664	.	C	A	1767.35	PASS	AF=1;AO=116;DP=116;FAO=116;FDP=116;FR=.;FRO=0;FSAF=49;FSAR=67;FSRF=0;FSRR=0;FWDB=-0.0092584;FXX=0;HRUN=2;LEN=1;MLLD=57.5442;OALT=A;OID=.;OMAPALT=A;OPOS=94664;OREF=C;QD=60.943;RBI=0.021065;REFB=0;REVB=0.0189213;RO=0;SAF=49;SAR=67;SRF=0;SRR=0;SSEN=0;SSEP=0;SSSB=-3.19736e-08;STB=0.5;STBP=1;TYPE=snp;VARB=5.9014e-05;ANN=A|missense_variant|MODERATE|YFL023W|YFL023W|transcript|TRANSCRIPT_YFL023W|protein_…	GT:GQ:DP:FDP:RO:FRO:AO:FAO:AF:SAR:SAF:SRF:SRR:FSAR:FSAF:FSRF:FSRR	1/1:10:116:116:0:0:116:116:1:67:49:0:0:67:49:0:0
S000001547	YKL064W	MNR2	MaNganese Resistance	putative Mg(2+) transporter MNR2	Vacuolar membrane protein required for magnesium homeostasis	Vacuolar membrane protein required for magnesium homeostasis; putative magnesium transporter; has similarity to Alr1p and Alr2p, which mediate influx of Mg2+ and other divalent cations; localizes to sites of contact between the vacuole and mitochondria (vCLAMPs)	969	109737	YKL064W	chr11	327023	.	G	A	3274.85	PASS	AF=1;AO=212;DP=213;FAO=212;FDP=212;FR=.;FRO=0;FSAF=108;FSAR=104;FSRF=0;FSRR=0;FWDB=0.0220484;FXX=0.00469462;HRUN=1;LEN=1;MLLD=79.9066;OALT=A;OID=.;OMAPALT=A;OPOS=327023;OREF=G;QD=61.7896;RBI=0.0225775;REFB=-0.0554834;REVB=0.00485908;RO=0;SAF=108;SAR=104;SRF=0;SRR=0;SSEN=0;SSEP=0;SSSB=-3.77094e-08;STB=0.5;STBP=1;TYPE=snp;VARB=0.00019936;ANN=A|missense_variant|MODERATE|YKL064W|YKL064W|transcript|TR…	GT:GQ:DP:FDP:RO:FRO:AO:FAO:AF:SAR:SAF:SRF:SRR:FSAR:FSAF:FSRF:FSRR	1/1:13:213:212:0:0:212:212:1:104:108:0:0:104:108:0:0

## Sheet: doa4-12 mutant
SGDID	Systematic	Gene	Gene Name	Alias	Short Description	Description	Length	MW	Systematics	CHROM	POS	ID	REF	ALT	QUAL	FILTER	INFO	GT	AD
S000004758	YMR150C	IMP1	Inner Membrane Protease	PET-TS2858 endopeptidase catalytic subunit IMP1	Catalytic subunit of mitochondrial inner membrane peptidase complex	Catalytic subunit of mitochondrial inner membrane peptidase complex; required for maturation of mitochondrial proteins of the intermembrane space; complex contains two catalytic subunits (Imp1p and Imp2p that differ in substrate specificty) and Som1p	190	21432.9	YMR150C	chr13	570651	.	C	CT,T	1360.93	PASS	AF=0.977778,0.0222222;AO=85,3;DP=90;FAO=88,2;FDP=90;FR=.;FRO=0;FSAF=37,2;FSAR=51,0;FSRF=0;FSRR=0;FWDB=0.0240172,-0.00248123;FXX=0;HRUN=1,2;LEN=1,1;MLLD=34.8901,7.3188;OALT=T,T;OID=.,.;OMAPALT=CT,T;OPOS=570652,570651;OREF=-,C;QD=60.4857;RBI=0.0953057,0.0425844;REFB=0,0;REVB=0.0922298,0.0425121;RO=2;SAF=37,2;SAR=48,1;SRF=0;SRR=2;SSEN=0,0;SSEP=0,0;SSSB=0.0193281,0.39997;STB=0.5,0.5;STBP=1,1;TYPE=ins…	GT:GQ:DP:FDP:RO:FRO:AO:FAO:AF:SAR:SAF:SRF:SRR:FSAR:FSAF:FSRF:FSRR	1/2:4:90:90:2:0:85,3:88,2:0.977778,0.0222222:48,1:37,2:0:2:51,0:37,2:0:0
S000004109	YLR119W	SRN2	Suppressor of Rna mutations, Number 2	VPL16 ESCRT-I subunit protein SRN2 VPS37 SRN10	Component of the ESCRT-I complex	Component of the ESCRT-I complex; ESCRT-I is involved in ubiquitin-dependent sorting of proteins into the endosome; suppressor of rna1-1 mutation; may be involved in RNA export from nucleus	213	25106	YLR119W	chr12	386480	.	G	GA,GAA,GAAA	1100.14	PASS	AF=0,1,0;AO=4,66,5;DP=75;FAO=0,75,0;FDP=75;FR=.;FRO=0;FSAF=0,32,0;FSAR=0,43,0;FSRF=0;FSRR=0;FWDB=-0.0400504,-0.0201349,-0.0132243;FXX=0;HRUN=3,3,3;LEN=1,2,3;MLLD=20.9328,35.5869,23.446;OALT=A,AA,AAA;OID=.,.,.;OMAPALT=GA,GAA,GAAA;OPOS=386481,386481,386481;OREF=-,-,-;QD=58.6742;RBI=0.134951,0.0642362,0.0419563;REFB=0,0,0;REVB=-0.12887,-0.060999,-0.0398177;RO=0;SAF=3,26,3;SAR=1,40,2;SRF=0;SRR=0;SSEN…	GT:GQ:DP:FDP:RO:FRO:AO:FAO:AF:SAR:SAF:SRF:SRR:FSAR:FSAF:FSRF:FSRR	2/2:6:75:75:0:0:4,66,5:0,75,0:0,1,0:1,40,2:3,26,3:0:0:0,43,0:0,32,0:0:0
S000004322	YLR330W	CHS5	CHitin Synthase-related	CAL3	Component of the exomer complex	Component of the exomer complex; the exomer which also contains Csh6p, Bch1p, Bch2p, and Bud7, is involved in the export of select proteins, such as chitin synthase Chs3p, from the Golgi to the plasma membrane; interacts selectively with the activated, GTP-bound form of Arf1p; Chs5p is the only protein with a BRCT domain that is not localized to the nucleus	671	73568.9	YLR330W	chr12	781889	.	G	A	892.718	PASS	AF=1;AO=58;DP=64;FAO=63;FDP=63;FR=.,HEALED;FRO=0;FSAF=37;FSAR=26;FSRF=0;FSRR=0;FWDB=0.181945;FXX=0.0156226;HRUN=2;LEN=1;MLLD=48.0075;OALT=A;OID=.;OMAPALT=A;OPOS=781889;OREF=G;QD=56.6805;RBI=0.215009;REFB=0;REVB=0.114564;RO=1;SAF=35;SAR=23;SRF=0;SRR=1;SSEN=0;SSEP=0;SSSB=0.0200666;STB=0.5;STBP=1;TYPE=snp;VARB=0.00443957;ANN=A|missense_variant|MODERATE|YLR330W|YLR330W|transcript|TRANSCRIPT_YLR330W|p…	GT:GQ:DP:FDP:RO:FRO:AO:FAO:AF:SAR:SAF:SRF:SRR:FSAR:FSAF:FSRF:FSRR	1/1:4:64:63:1:0:58:63:1:23:35:0:1:26:37:0:0
S000005505	YOL145C	CTR9	Cln Three (CLN3) Requiring	CDP1	Component of the Paf1p complex involved in transcription elongation	Component of the Paf1p complex involved in transcription elongation; binds to and modulates the activity of RNA polymerases I and II; required for expression of a subset of genes, including cyclin genes; involved in SER3 repression by helping to maintain SRG1 transcription-dependent nucleosome occupancy; contains TPR repeats	1077	124694	YOL145C	chr15	53457	.	G	GT,GTT	1005.39	PASS	AF=1,0;AO=64,3;DP=76;FAO=71,0;FDP=71;FR=.;FRO=0;FSAF=25,0;FSAR=46,0;FSRF=0;FSRR=0;FWDB=-0.157633,-0.082515;FXX=0;HRUN=1,1;LEN=1,2;MLLD=28.0324,10.8303;OALT=T,TT;OID=.,.;OMAPALT=GT,GTT;OPOS=53458,53458;OREF=-,-;QD=56.6419;RBI=0.167158,0.0872759;REFB=0,0;REVB=-0.0556204,-0.0284316;RO=9;SAF=22,2;SAR=42,1;SRF=3;SRR=6;SSEN=0,0;SSEP=0,0;SSSB=0.00267665,0.341307;STB=0.5,0.5;STBP=1,1;TYPE=ins,ins;VARB=-0…	GT:GQ:DP:FDP:RO:FRO:AO:FAO:AF:SAR:SAF:SRF:SRR:FSAR:FSAF:FSRF:FSRR	1/1:6:76:71:9:0:64,3:71,0:1,0:42,1:22,2:3:6:46,0:25,0:0:0
S000005900	YOR373W	NUD1	None	None	Component of the spindle pole body outer plaque	Component of the spindle pole body outer plaque; acts through the mitotic exit network to specify asymmetric spindle pole body inheritance	851	94100.1	YOR373W	chr15	1036982	.	ACA	A,AA	462.711	PASS	AF=0.03125,0.96875;AO=2,28;DP=32;FAO=1,31;FDP=32;FR=.;FRO=0;FSAF=1,19;FSAR=0,12;FSRF=0;FSRR=0;FWDB=0.027761,0.0281004;FXX=0;HRUN=1,1;LEN=2,1;MLLD=127.992,144.261;OALT=-,-;OID=.,.;OMAPALT=A,AA;OPOS=1036983,1036983;OREF=CA,C;QD=57.8389;RBI=0.0814302,0.0760127;REFB=0,0;REVB=0.076552,0.0706279;RO=1;SAF=2,16;SAR=0,12;SRF=1;SRR=0;SSEN=0,0;SSEP=0,0;SSSB=0,-0.0282029;STB=0.5,0.5;STBP=1,1;TYPE=del,del;VAR…	GT:GQ:DP:FDP:RO:FRO:AO:FAO:AF:SAR:SAF:SRF:SRR:FSAR:FSAF:FSRF:FSRR	1/2:4:32:32:1:0:2,28:1,31:0.03125,0.96875:0,12:2,16:1:0:0,12:1,19:0:0
S000003398	YGR166W	TRS65	TRapp Subunit	KRE11	Component of transport protein particle (TRAPP) complex II	Component of transport protein particle (TRAPP) complex II; TRAPPII is a multimeric guanine nucleotide-exchange factor for the GTPase Ypt1p, regulating intra-Golgi and endosome-Golgi traffic; role in cell wall beta-glucan biosynthesis and the stress response	560	63377.5	YGR166W	chr07	842714	.	T	TC	857.166	PASS	AF=1;AO=3;DP=81;FAO=81;FDP=81;FR=.;FRO=0;FSAF=40;FSAR=41;FSRF=0;FSRR=0;FWDB=0.174624;FXX=0;HRUN=4;LEN=1;MLLD=14.2529;OALT=C;OID=.;OMAPALT=TC;OPOS=842715;OREF=-;QD=42.3292;RBI=0.20338;REFB=0;REVB=-0.104259;RO=78;SAF=1;SAR=2;SRF=39;SRR=39;SSEN=0;SSEP=0;SSSB=-0.128788;STB=0.5;STBP=1;TYPE=ins;VARB=0.0025457;ANN=TC|frameshift_variant|HIGH|YGR166W|YGR166W|transcript|TRANSCRIPT_YGR166W|protein_coding|1/…	GT:GQ:DP:FDP:RO:FRO:AO:FAO:AF:SAR:SAF:SRF:SRR:FSAR:FSAF:FSRF:FSRR	1/1:6:81:81:78:0:3:81:1:2:1:39:39:41:40:0:0
S000004537	YML072C	TCB3	Three Calcium and lipid Binding domains (TriCalBins)	None	Cortical ER protein involved in ER-plasma membrane tethering	Cortical ER protein involved in ER-plasma membrane tethering; one of 6 proteins (Ist2p, Scs2p, Scs22p, Tcb1p, Tcb2p, Tcb3p) that connect ER to the plasma membrane (PM) and regulate PM phosphatidylinositol-4-phosphate (PI4P) levels by controlling access of Sac1p phosphatase to its substrate PI4P in the PM; localized to the bud via specific mRNA transport; non-tagged protein detected in a phosphory…	1545	171072	YML072C	chr13	129592	.	A	C	1172.01	PASS	AF=1;AO=77;DP=77;FAO=77;FDP=77;FR=.;FRO=0;FSAF=46;FSAR=31;FSRF=0;FSRR=0;FWDB=0.0234822;FXX=0;HRUN=1;LEN=1;MLLD=318.762;OALT=C;OID=.;OMAPALT=C;OPOS=129592;OREF=A;QD=60.8835;RBI=0.0262497;REFB=0;REVB=0.0117318;RO=0;SAF=46;SAR=31;SRF=0;SRR=0;SSEN=0;SSEP=0;SSSB=-3.64555e-08;STB=0.5;STBP=1;TYPE=snp;VARB=4.26908e-05;ANN=C|missense_variant|MODERATE|YML072C|YML072C|transcript|TRANSCRIPT_YML072C|protein_c…	GT:GQ:DP:FDP:RO:FRO:AO:FAO:AF:SAR:SAF:SRF:SRR:FSAR:FSAF:FSRF:FSRR	1/1:6:77:77:0:0:77:77:1:31:46:0:0:31:46:0:0
S000005572	YOR046C	DBP5	Dead Box Protein	ATP-dependent RNA helicase DBP5 RAT8	Cytoplasmic ATP-dependent RNA helicase of the DEAD-box family	Cytoplasmic ATP-dependent RNA helicase of the DEAD-box family; involved in mRNA export from the nucleus, remodeling messenger ribonucleoprotein particles (mRNPs), with ATPase activity stimulated by Gle1p, IP6 and Nup159p; involved in translation termination along with Sup45p (eRF1); role in the cellular response to heat stress	482	53874.5	YOR046C	chr15	417065	.	GTT	G,GT	271.64	PASS	AF=0.0208333,0.9375;AO=8,29;DP=48;FAO=1,45;FDP=48;FR=.;FRO=2;FSAF=0,17;FSAR=1,28;FSRF=2;FSRR=0;FWDB=-0.0644924,-0.121399;FXX=0.020404;HRUN=7,7;LEN=2,1;MLLD=10.9713,9.0437;OALT=-,-;OID=.,.;OMAPALT=G,GT;OPOS=417066,417066;OREF=TT,T;QD=22.6367;RBI=0.0659239,0.12409;REFB=0.0276765,0.0376289;REVB=-0.0136632,-0.0257029;RO=8;SAF=5,11;SAR=3,18;SRF=3;SRR=5;SSEN=0,0;SSEP=0,0;SSSB=0.211205,0.00182491;STB=0.…	GT:GQ:DP:FDP:RO:FRO:AO:FAO:AF:SAR:SAF:SRF:SRR:FSAR:FSAF:FSRF:FSRR	0/2:10:48:48:8:2:8,29:1,45:0.0208333,0.9375:3,18:5,11:3:5:1,28:0,17:2:0
S000001699	YKL216W	URA1	URAcil requiring	dihydroorotate dehydrogenase	Dihydroorotate dehydrogenase	Dihydroorotate dehydrogenase; catalyzes the fourth enzymatic step in the de novo biosynthesis of pyrimidines, converting dihydroorotic acid into orotic acid	314	34798.2	YKL216W	chr11	25791	.	C	CA,CAA	567.034	PASS	AF=1,0;AO=64,11;DP=87;FAO=86,0;FDP=86;FR=.;FRO=0;FSAF=43,0;FSAR=43,0;FSRF=0;FSRR=0;FWDB=-0.0373853,-0.0192491;FXX=0;HRUN=5,5;LEN=1,2;MLLD=8.6377,8.44586;OALT=A,AA;OID=.,.;OMAPALT=CA,CAA;OPOS=25792,25792;OREF=-,-;QD=26.3737;RBI=0.155607,0.0810865;REFB=0,0;REVB=-0.151049,-0.0787686;RO=11;SAF=33,3;SAR=31,8;SRF=7;SRR=4;SSEN=0,0;SSEP=0,0;SSSB=-0.0333021,-0.325354;STB=0.5,0.5;STBP=1,1;TYPE=ins,ins;VARB…	GT:GQ:DP:FDP:RO:FRO:AO:FAO:AF:SAR:SAF:SRF:SRR:FSAR:FSAF:FSRF:FSRR	1/1:3:87:86:11:0:64,11:86,0:1,0:31,8:33,3:7:4:43,0:43,0:0:0
S000003182	YGL214W	None	None	None	Dubious open reading frame	Dubious open reading frame; unlikely to encode a functional protein, based on available experimental and comparative sequence data; deletion mutation phenotype is likely due to the overlapping verified ORF SKI8/YGL213C	161	17936.8	YGL214W	chr07	91720	.	TGA	GAT,TGAT	774.057	PASS	AF=0,1;AO=2,53;DP=58;FAO=0,56;FDP=56;FR=.;FRO=0;FSAF=0,25;FSAR=0,31;FSRF=0;FSRR=0;FWDB=0.00136741,0.129564;FXX=0.0175408;HRUN=1,1;LEN=3,1;MLLD=180.928,27.8237;OALT=GAT,T;OID=.,.;OMAPALT=GAT,TGAT;OPOS=91720,91723;OREF=TGA,-;QD=55.2898;RBI=0.0154525,0.150119;REFB=0,0;REVB=-0.0153919,0.0758205;RO=3;SAF=0,25;SAR=2,28;SRF=0;SRR=3;SSEN=0,0;SSEP=0,0;SSSB=0,0.0478435;STB=0.5,0.5;STBP=1,1;TYPE=mnp,ins;VAR…	GT:GQ:DP:FDP:RO:FRO:AO:FAO:AF:SAR:SAF:SRF:SRR:FSAR:FSAF:FSRF:FSRR	2/2:4:58:56:3:0:2,53:0,56:0,1:2,28:0,25:0:3:0,31:0,25:0:0
S000004906	YMR292W	GOT1	GOlgi Transport	None	Homodimeric protein that is packaged into COPII vesicles	Homodimeric protein that is packaged into COPII vesicles; cycles between the ER and Golgi; involved in secretory transport but not directly required for aspects of transport assayed in vitro; may influence membrane composition	138	15436.8	YMR292W	chr13	863454	.	T	TG	974.907	PASS	AF=1;AO=5;DP=81;FAO=69;FDP=69;FR=.;FRO=0;FSAF=39;FSAR=30;FSRF=0;FSRR=0;FWDB=0.0686953;FXX=0.0142837;HRUN=0;LEN=1;MLLD=254.308;OALT=G;OID=.;OMAPALT=TG;OPOS=863455;OREF=-;QD=56.5163;RBI=0.10211;REFB=0;REVB=-0.0755478;RO=76;SAF=1;SAR=4;SRF=46;SRR=30;SSEN=0;SSEP=0;SSSB=-0.385804;STB=0.5;STBP=1;TYPE=ins;VARB=0.00162955;ANN=TG|frameshift_variant|HIGH|YMR292W|YMR292W|transcript|TRANSCRIPT_YMR292W|protei…	GT:GQ:DP:FDP:RO:FRO:AO:FAO:AF:SAR:SAF:SRF:SRR:FSAR:FSAF:FSRF:FSRR	1/1:6:81:69:76:0:5:69:1:4:1:46:30:30:39:0:0
S000004906	YMR292W	GOT1	GOlgi Transport	None	Homodimeric protein that is packaged into COPII vesicles	Homodimeric protein that is packaged into COPII vesicles; cycles between the ER and Golgi; involved in secretory transport but not directly required for aspects of transport assayed in vitro; may influence membrane composition	138	15436.8	YMR292W	chr13	863569	.	G	GT,GTT	767.789	PASS	AF=1,0;AO=53,2;DP=57;FAO=56,0;FDP=56;FR=.;FRO=0;FSAF=33,0;FSAR=23,0;FSRF=0;FSRR=0;FWDB=-0.0428963,-0.0221164;FXX=0;HRUN=1,1;LEN=1,2;MLLD=27.7418,8.38491;OALT=T,TT;OID=.,.;OMAPALT=GT,GTT;OPOS=863570,863570;OREF=-,-;QD=54.842;RBI=0.050479,0.026106;REFB=0,0;REVB=-0.026609,-0.0138705;RO=2;SAF=33,0;SAR=20,2;SRF=0;SRR=2;SSEN=0,0;SSEP=0,0;SSSB=0.0448028,0;STB=0.5,0.5;STBP=1,1;TYPE=ins,ins;VARB=-0.004167…	GT:GQ:DP:FDP:RO:FRO:AO:FAO:AF:SAR:SAF:SRF:SRR:FSAR:FSAF:FSRF:FSRR	1/1:4:57:56:2:0:53,2:56,0:1,0:20,2:33,0:0:2:23,0:33,0:0:0
S000006123	YPL202C	AFT2	Activator of Fe (iron) Transcription	None	Iron-regulated transcriptional activator	Iron-regulated transcriptional activator; activates genes involved in intracellular iron use and required for iron homeostasis and resistance to oxidative stress; AFT2 has a paralog, AFT1, that arose from the whole genome duplication	416	47113.4	YPL202C	chr16	169010	.	ATTTTTTTTAG	AATTTTTTTAG,ATTTTTTAG,ATTTTTTTAG,ATTTTTTTAGT	324.621	PASS	AF=0.0208333,0,0.9375,0;AO=2,2,22,7;DP=48;FAO=1,0,45,0;FDP=48;FR=.;FRO=2;FSAF=0,0,27,0;FSAR=1,0,18,0;FSRF=2;FSRR=0;FWDB=0.0885944,0.0972169,0.187531,-0.0921918;FXX=0;HRUN=8,8,8,8;LEN=1,2,1,3;MLLD=13.5091,7.75307,10.0449,96.7047;OALT=A,-,-,AGT;OID=.,.,.,.;OMAPALT=AATTTTTTTAG,ATTTTTTAG,ATTTTTTTAG,ATTTTTTTAGT;OPOS=169011,169011,169011,169018;OREF=T,TT,T,TAG;QD=27.0517;RBI=0.123681,0.104071,0.201422,…	GT:GQ:DP:FDP:RO:FRO:AO:FAO:AF:SAR:SAF:SRF:SRR:FSAR:FSAF:FSRF:FSRR	0/3:8:48:48:13:2:2,2,22,7:1,0,45,0:0.0208333,0,0.9375,0:2,2,7,0:0,0,15,7:5:8:1,0,18,0:0,0,27,0:2:0
S000006046	YPL125W	KAP120	KAryoPherin	LPH2	Karyopherin responsible for the nuclear import of Rpf1p	Karyopherin responsible for the nuclear import of Rpf1p; Rpf1p is a ribosome maturation factor	1032	119592	YPL125W	chr16	313743	.	G	GA	719.681	PASS	AF=1;AO=47;DP=49;FAO=47;FDP=47;FR=.;FRO=0;FSAF=23;FSAR=24;FSRF=0;FSRR=0;FWDB=0.080023;FXX=0;HRUN=1;LEN=1;MLLD=26.9403;OALT=A;OID=.;OMAPALT=GA;OPOS=313744;OREF=-;QD=61.2494;RBI=0.0816079;REFB=0;REVB=0.0160054;RO=1;SAF=24;SAR=23;SRF=1;SRR=0;SSEN=0;SSEP=0;SSSB=-0.019193;STB=0.5;STBP=1;TYPE=ins;VARB=0.00279239;ANN=GA|frameshift_variant|HIGH|YPL125W|YPL125W|transcript|TRANSCRIPT_YPL125W|protein_coding…	GT:GQ:DP:FDP:RO:FRO:AO:FAO:AF:SAR:SAF:SRF:SRR:FSAR:FSAF:FSRF:FSRR	1/1:4:49:47:1:0:47:47:1:23:24:1:0:24:23:0:0
S000000249	YBR045C	GIP1	Glc7-Interacting Protein	protein phosphatase regulator GIP1	Meiosis-specific regulatory subunit of the Glc7p protein phosphatase	Meiosis-specific regulatory subunit of the Glc7p protein phosphatase; regulates spore wall formation and septin organization, required for expression of some late meiotic genes and for normal localization of Glc7p	639	73327.2	YBR045C	chr02	328479	.	A	AT,ATT	813.531	PASS	AF=1,0;AO=59,3;DP=69;FAO=66,0;FDP=66;FR=.;FRO=0;FSAF=26,0;FSAR=40,0;FSRF=0;FSRR=0;FWDB=0.0353265,0.0175284;FXX=0;HRUN=3,3;LEN=1,2;MLLD=20.2249,8.60677;OALT=T,TT;OID=.,.;OMAPALT=AT,ATT;OPOS=328480,328480;OREF=-,-;QD=49.3049;RBI=0.0520972,0.0261895;REFB=0,0;REVB=0.0382904,0.0194587;RO=6;SAF=26,0;SAR=33,3;SRF=2;SRR=4;SSEN=0,0;SSEP=0,0;SSSB=0.018945,-0.637446;STB=0.5,0.5;STBP=1,1;TYPE=ins,ins;VARB=0.…	GT:GQ:DP:FDP:RO:FRO:AO:FAO:AF:SAR:SAF:SRF:SRR:FSAR:FSAF:FSRF:FSRR	1/1:4:69:66:6:0:59,3:66,0:1,0:33,3:26,0:2:4:40,0:26,0:0:0
S000000280	YBR076W	ECM8	ExtraCellular Mutant	None	Non-essential protein of unknown function	Non-essential protein of unknown function	354	41783.1	YBR076W	chr02	390540	.	TGC	TC,TCA,TTC	967.949	PASS	AF=0.955882,0.0147059,0.0294118;AO=63,2,2;DP=68;FAO=65,1,2;FDP=68;FR=.;FRO=0;FSAF=28,1,2;FSAR=37,0,0;FSRF=0;FSRR=0;FWDB=0.00670575,0.00295566,0.00444716;FXX=0;HRUN=1,1,1;LEN=1,2,1;MLLD=108.35,82.011,84.3394;OALT=-,CA,T;OID=.,.,.;OMAPALT=TC,TCA,TTC;OPOS=390541,390541,390541;OREF=G,GC,G;QD=56.9382;RBI=0.00733569,0.00313608,0.0065946;REFB=0,0,0;REVB=-0.0029741,-0.00104838,0.00486945;RO=0;SAF=28,1,2;…	GT:GQ:DP:FDP:RO:FRO:AO:FAO:AF:SAR:SAF:SRF:SRR:FSAR:FSAF:FSRF:FSRR	1/3:6:68:68:0:0:63,2,2:65,1,2:0.955882,0.0147059,0.0294118:35,1,0:28,1,2:0:0:37,0,0:28,1,2:0:0
S000001800	YKR092C	SRP40	Serine Rich Protein	None	Nucleolar serine-rich protein	Nucleolar serine-rich protein; role in preribosome assembly or transport; may function as a chaperone of small nucleolar ribonucleoprotein particles (snoRNPs); immunologically and structurally to rat Nopp140	406	40971.7	YKR092C	chr11	622617	.	GAGTCACTGCTGTCACTGC	G	50	PASS	AF=1.18644;AO=70;DP=59;FR=.;LEN=18;OALT=-;OID=.;OMAPALT=G;OPOS=622618;OREF=AGTCACTGCTGTCACTGC;RO=0;SAF=35;SAR=35;SRF=0;SRR=0;TYPE=del;ANN=G|disruptive_inframe_deletion|MODERATE|YKR092C|YKR092C|transcript|TRANSCRIPT_YKR092C|protein_coding|1/1|c.197_214delGCAGTGACAGCAGTGACT|p.Cys66_Asp71del|214/1221|197/1221|66/406||	GT:GQ:DP:RO:AO:SAF:SAR:SRF:SRR:AF	1/1:99:59:0:70:35:35:0:0:1.18644
S000001800	YKR092C	SRP40	Serine Rich Protein	None	Nucleolar serine-rich protein	Nucleolar serine-rich protein; role in preribosome assembly or transport; may function as a chaperone of small nucleolar ribonucleoprotein particles (snoRNPs); immunologically and structurally to rat Nopp140	406	40971.7	YKR092C	chr11	622631	.	ACTGCAGTCACTGCTGTCACTGCTG	A	801.328	PASS	AF=1;AO=56;DP=56;FAO=56;FDP=56;FR=.;FRO=0;FSAF=26;FSAR=30;FSRF=0;FSRR=0;FWDB=0.0268998;FXX=0;HRUN=1;LEN=24;MLLD=731.859;OALT=-;OID=.;OMAPALT=A;OPOS=622632;OREF=CTGCAGTCACTGCTGTCACTGCTG;QD=57.2377;RBI=0.0502636;REFB=0;REVB=0.0424597;RO=0;SAF=26;SAR=30;SRF=0;SRR=0;SSEN=0;SSEP=0;SSSB=-3.29784e-08;STB=0.5;STBP=1;TYPE=del;VARB=9.40172e-05;ANN=A|disruptive_inframe_deletion|MODERATE|YKR092C|YKR092C|tran…	GT:GQ:DP:FDP:RO:FRO:AO:FAO:AF:SAR:SAF:SRF:SRR:FSAR:FSAF:FSRF:FSRR	1/1:4:56:56:0:0:56:56:1:30:26:0:0:30:26:0:0
S000001739	YKR031C	SPO14	SPOrulation	PLD1 phospholipase D	Phospholipase D	Phospholipase D; catalyzes the hydrolysis of phosphatidylcholine, producing choline and phosphatidic acid; involved in Sec14p-independent secretion; required for meiosis and spore formation; differently regulated in secretion and meiosis; participates in transcription initiation and/or early elongation of specific genes; interacts with "foot domain" of RNA polymerase II; deletion results in abnor…	1683	195204	YKR031C	chr11	510702	.	TCAAT	CAAAT,TCAAA,TCAAAT,TCAAATT	1032.2	PASS	AF=0,0,1,0;AO=2,7,66,4;DP=79;FAO=0,0,74,0;FDP=74;FR=.;FRO=0;FSAF=0,0,38,0;FSAR=0,0,36,0;FSRF=0;FSRR=0;FWDB=0.0559428,0.0727184,0.0993146,0.0365047;FXX=0.0263123;HRUN=3,3,2,2;LEN=2,1,1,2;MLLD=3.92721,4.28862,22.2173,6.39119;OALT=CA,A,A,AT;OID=.,.,.,.;OMAPALT=CAAAT,TCAAA,TCAAAT,TCAAATT;OPOS=510702,510706,510704,510706;OREF=TC,T,-,-;QD=55.7943;RBI=0.102297,0.0840083,0.0993476,0.0524925;REFB=0,0,0,0;…	GT:GQ:DP:FDP:RO:FRO:AO:FAO:AF:SAR:SAF:SRF:SRR:FSAR:FSAF:FSRF:FSRR	3/3:6:79:74:0:0:2,7,66,4:0,0,74,0:0,0,1,0:1,5,32,3:1,2,34,1:0:0:0,0,36,0:0,0,38,0:0:0
S000003933	YLL010C	PSR1	Plasma membrane Sodium Response	phosphatase	Plasma membrane associated protein phosphatase	Plasma membrane associated protein phosphatase; involved in the general stress response; required along with binding partner Whi2p for full activation of STRE-mediated gene expression, possibly through dephosphorylation of Msn2p; PSR1 has a paralog, PSR2, that arose from the whole genome duplication	427	47911	YLL010C	chr12	130766	.	ACTGTGACTGTGACTGTGACT	ACTGTGACT,ACTGTGACTG	516.739	PASS	AF=1,0;AO=28,2;DP=41;FAO=35,0;FDP=35;FR=.;FRO=0;FSAF=16,0;FSAR=19,0;FSRF=0;FSRR=0;FWDB=0.0431111,0.0366888;FXX=0.146306;HRUN=1,1;LEN=12,11;MLLD=301.21,287.577;OALT=-,-;OID=.,.;OMAPALT=ACTGTGACT,ACTGTGACTG;OPOS=130767,130776;OREF=CTGTGACTGTGA,TGACTGTGACT;QD=59.0559;RBI=0.0764524,0.0595462;REFB=0,0;REVB=0.063138,0.0469008;RO=0;SAF=11,1;SAR=17,1;SRF=0;SRR=0;SSEN=0,0;SSEP=0,0;SSSB=3.31638e-08,0;STB=0…	GT:GQ:DP:FDP:RO:FRO:AO:FAO:AF:SAR:SAF:SRF:SRR:FSAR:FSAF:FSRF:FSRR	1/1:3:41:35:0:0:28,2:35,0:1,0:17,1:11,1:0:0:19,0:16,0:0:0
S000005875	YOR348C	PUT4	Proline UTilization	proline permease PUT4	Proline permease	Proline permease; required for high-affinity transport of proline; also transports the toxic proline analog azetidine-2-carboxylate (AzC); PUT4 transcription is repressed in ammonia-grown cells	627	68789.1	YOR348C	chr15	987143	.	AC	A,AA	913.665	PASS	AF=0.015873,0.984127;AO=11,52;DP=63;FAO=1,62;FDP=63;FR=.;FRO=0;FSAF=1,28;FSAR=0,34;FSRF=0;FSRR=0;FWDB=0.0680794,0.0703455;FXX=0;HRUN=1,1;LEN=1,1;MLLD=221.344,236.136;OALT=-,A;OID=.,.;OMAPALT=A,AA;OPOS=987144,987144;OREF=C,C;QD=58.0105;RBI=0.0682176,0.0705625;REFB=0,0;REVB=0.00433995,0.00552941;RO=0;SAF=11,18;SAR=0,34;SRF=0;SRR=0;SSEN=0,0;SSEP=0,0;SSSB=0,-4.19096e-08;STB=0.5,0.5;STBP=1,1;TYPE=del,…	GT:GQ:DP:FDP:RO:FRO:AO:FAO:AF:SAR:SAF:SRF:SRR:FSAR:FSAF:FSRF:FSRR	1/2:3:63:63:0:0:11,52:1,62:0.015873,0.984127:0,34:11,18:0:0:0,34:1,28:0:0
S000000420	YBR216C	YBP1	Yap1-Binding Protein	None	Protein involved in cellular response to oxidative stress	Protein involved in cellular response to oxidative stress; required for oxidation of specific cysteine residues of transcription factor Yap1p, resulting in nuclear localization of Yap1p in response to stress; YBP1 has a paralog, YBP2, that arose from the whole genome duplication	674	77730.1	YBR216C	chr02	663081	.	A	AG,AGG	671.939	PASS	AF=0.985507,0.0144928;AO=60,5;DP=78;FAO=68,1;FDP=69;FR=.;FRO=0;FSAF=35,1;FSAR=33,0;FSRF=0;FSRR=0;FWDB=0.0313911,0.015531;FXX=0;HRUN=5,5;LEN=1,2;MLLD=12.7464,9.10443;OALT=G,GG;OID=.,.;OMAPALT=AG,AGG;OPOS=663082,663082;OREF=-,-;QD=38.953;RBI=0.166659,0.086755;REFB=0,0;REVB=-0.163676,-0.0853535;RO=12;SAF=32,1;SAR=28,4;SRF=10;SRR=2;SSEN=0,0;SSEP=0,0;SSSB=-0.0947884,-0.614907;STB=0.5,0.5;STBP=1,1;TYPE…	GT:GQ:DP:FDP:RO:FRO:AO:FAO:AF:SAR:SAF:SRF:SRR:FSAR:FSAF:FSRF:FSRR	1/2:4:78:69:12:0:60,5:68,1:0.985507,0.0144928:28,4:32,1:10:2:33,0:35,1:0:0
S000004428	YLR436C	ECM30	ExtraCellular Mutant	None	Protein of unknown function	Protein of unknown function; may play a role in cell wall biosynthesis, mutants have abormal relative levels of mannose and glucose and have Gap1p sorting and transport defects; (GFP)-fusion protein localizes to the cytoplasm	1274	145053	YLR436C	chr12	1004866	.	C	CA	954.005	PASS	AF=1;AO=66;DP=69;FAO=68;FDP=68;FR=.;FRO=0;FSAF=30;FSAR=38;FSRF=0;FSRR=0;FWDB=0.0798451;FXX=0;HRUN=1;LEN=1;MLLD=24.5495;OALT=A;OID=.;OMAPALT=CA;OPOS=1004867;OREF=-;QD=56.1179;RBI=0.123073;REFB=0;REVB=-0.0936574;RO=2;SAF=30;SAR=36;SRF=0;SRR=2;SSEN=0;SSEP=0;SSSB=0.0255251;STB=0.5;STBP=1;TYPE=ins;VARB=-0.000202499;ANN=CA|frameshift_variant|HIGH|YLR436C|YLR436C|transcript|TRANSCRIPT_YLR436C|protein_co…	GT:GQ:DP:FDP:RO:FRO:AO:FAO:AF:SAR:SAF:SRF:SRR:FSAR:FSAF:FSRF:FSRR	1/1:5:69:68:2:0:66:68:1:36:30:0:2:38:30:0:0
S000001189	YHR146W	CRP1	Cruciform DNA-Recognizing Protein	None	Protein that binds to cruciform DNA structures	Protein that binds to cruciform DNA structures; CRP1 has a paralog, MDG1, that arose from the whole genome duplication	465	51116.2	YHR146W	chr08	385696	.	C	A,T	1226.55	PASS	AF=0.0246914,0.975309;AO=2,79;DP=81;FAO=2,79;FDP=81;FR=.;FRO=0;FSAF=2,42;FSAR=0,37;FSRF=0;FSRR=0;FWDB=-0.00117209,-0.0652535;FXX=0;HRUN=2,2;LEN=1,1;MLLD=43.2867,64.6054;OALT=A,T;OID=.,.;OMAPALT=A,T;OPOS=385696,385696;OREF=C,C;QD=60.5705;RBI=0.0243045,0.0654362;REFB=0,0;REVB=-0.0242762,0.00488685;RO=0;SAF=2,42;SAR=0,37;SRF=0;SRR=0;SSEN=0,0;SSEP=0,0;SSSB=0,0;STB=0.5,0.5;STBP=1,1;TYPE=snp,snp;VARB=0…	GT:GQ:DP:FDP:RO:FRO:AO:FAO:AF:SAR:SAF:SRF:SRR:FSAR:FSAF:FSRF:FSRR	1/2:4:81:81:0:0:2,79:2,79:0.0246914,0.975309:0,37:2,42:0:0:0,37:2,42:0:0
S000001189	YHR146W	CRP1	Cruciform DNA-Recognizing Protein	None	Protein that binds to cruciform DNA structures	Protein that binds to cruciform DNA structures; CRP1 has a paralog, MDG1, that arose from the whole genome duplication	465	51116.2	YHR146W	chr08	386694	.	A	AG,G	424.063	PASS	AF=0.0333333,0.966667;AO=4,22;DP=30;FAO=1,29;FDP=30;FR=.;FRO=0;FSAF=0,6;FSAR=1,23;FSRF=0;FSRR=0;FWDB=0.0121683,0.0270726;FXX=0;HRUN=0,8;LEN=1,1;MLLD=274.457,283.589;OALT=G,G;OID=.,.;OMAPALT=AG,G;OPOS=386695,386694;OREF=-,A;QD=56.5417;RBI=0.0122446,0.0271181;REFB=0,0;REVB=0.00136421,0.00157023;RO=0;SAF=2,2;SAR=2,20;SRF=0;SRR=0;SSEN=0,0;SSEP=0,0;SSSB=0,3.80459e-08;STB=0.5,0.5;STBP=1,1;TYPE=ins,snp;…	GT:GQ:DP:FDP:RO:FRO:AO:FAO:AF:SAR:SAF:SRF:SRR:FSAR:FSAF:FSRF:FSRR	1/2:4:30:30:0:0:4,22:1,29:0.0333333,0.966667:2,20:2,2:0:0:1,23:0,6:0:0
S000000479	YBR275C	RIF1	RAP1-Interacting Factor	DNA-binding protein RIF1	Protein that binds to the Rap1p C-terminus	Protein that binds to the Rap1p C-terminus; acts synergistically with Rif2p to help control telomere length and establish telomeric silencing; involved in control of DNA replication; contributes to resection of DNA double strand breaks (DSBs); deletion results in telomere elongation	1916	217912	YBR275C	chr02	758722	.	TG	AC,TC	1284.03	PASS	AF=0.0238095,0.97619;AO=2,82;DP=84;FAO=2,82;FDP=84;FR=.;FRO=0;FSAF=2,52;FSAR=0,30;FSRF=0;FSRR=0;FWDB=0.024032,0.0438438;FXX=0;HRUN=1,2;LEN=2,1;MLLD=165.855,210.283;OALT=AC,C;OID=.,.;OMAPALT=AC,TC;OPOS=758722,758723;OREF=TG,G;QD=61.1441;RBI=0.0323265,0.0487597;REFB=0,0;REVB=-0.021621,-0.0213361;RO=0;SAF=2,52;SAR=0,30;SRF=0;SRR=0;SSEN=0,0;SSEP=0,0;SSSB=0,0;STB=0.5,0.5;STBP=1,1;TYPE=mnp,snp;VARB=0.0…	GT:GQ:DP:FDP:RO:FRO:AO:FAO:AF:SAR:SAF:SRF:SRR:FSAR:FSAF:FSRF:FSRR	1/2:4:84:84:0:0:2,82:2,82:0.0238095,0.97619:0,30:2,52:0:0:0,30:2,52:0:0
S000003321	YGR089W	NNF2	None	None	Protein that exhibits physical and genetic interactions with Rpb8p	Protein that exhibits physical and genetic interactions with Rpb8p; Rpb8p is a subunit of RNA polymerases I, II, and III; computational analysis of large-scale protein-protein interaction data suggests a role in chromosome segregation	936	106477	YGR089W	chr07	664622	.	AAA	AGG	891.66	PASS	AF=0.969231;AO=54;DP=65;FAO=63;FDP=65;FR=.;FRO=2;FSAF=30;FSAR=33;FSRF=0;FSRR=2;FWDB=0.00900021;FXX=0;HRUN=7;LEN=2;MLLD=73.1752;OALT=GG;OID=.;OMAPALT=AGG;OPOS=664623;OREF=AA;QD=54.8714;RBI=0.0292226;REFB=-0.0106605;REVB=0.0278021;RO=0;SAF=26;SAR=28;SRF=0;SRR=0;SSEN=0;SSEP=0;SSSB=3.52846e-08;STB=0.514701;STBP=0.236;TYPE=mnp;VARB=0.000465366;ANN=AGG|missense_variant|MODERATE|YGR089W|YGR089W|transcri…	GT:GQ:DP:FDP:RO:FRO:AO:FAO:AF:SAR:SAF:SRF:SRR:FSAR:FSAF:FSRF:FSRR	0/1:6:65:65:0:2:54:63:0.969231:28:26:0:0:33:30:0:2
S000004000	YLR010C	TEN1	TElomeric pathways with STn1	None	Protein that regulates telomeric length	Protein that regulates telomeric length; protects telomeric ends in a complex with Cdc13p and Stn1p; similar to human Ten1 which is critical for the telomeric function of the CST (Cdc13p-Stn1p-Ten1p) complex	160	18604.8	YLR010C	chr12	168497	.	A	AT	1254.08	PASS	AF=1;AO=82;DP=85;FAO=82;FDP=82;FR=.;FRO=0;FSAF=37;FSAR=45;FSRF=0;FSRR=0;FWDB=-0.0958805;FXX=0.0120467;HRUN=1;LEN=1;MLLD=30.8357;OALT=T;OID=.;OMAPALT=AT;OPOS=168498;OREF=-;QD=61.1746;RBI=0.130665;REFB=0;REVB=-0.0887715;RO=3;SAF=37;SAR=45;SRF=0;SRR=3;SSEN=0;SSEP=0;SSSB=0.0305258;STB=0.5;STBP=1;TYPE=ins;VARB=-0.00294746;ANN=AT|frameshift_variant|HIGH|YLR010C|YLR010C|transcript|TRANSCRIPT_YLR010C|pro…	GT:GQ:DP:FDP:RO:FRO:AO:FAO:AF:SAR:SAF:SRF:SRR:FSAR:FSAF:FSRF:FSRR	1/1:7:85:82:3:0:82:82:1:45:37:0:3:45:37:0:0
S000005467	YOL107W	None	None	None	Putative protein of unknown function	Putative protein of unknown function; green fluorescent protein (GFP)-fusion protein localizes to the cytoplasm and colocalizes in a punctate pattern with the early golgi/COPI vesicles; YOL107W is not an essential protein	342	39751.3	YOL107W	chr15	115071	.	CAA	CA,C,CCA	328.711	PASS	AF=1,0,0;AO=32,5,4;DP=63;FAO=65,0,0;FDP=65;FR=.;FRO=0;FSAF=35,0,0;FSAR=30,0,0;FSRF=0;FSRR=0;FWDB=0.0229627,0.0153269,-0.0175011;FXX=0;HRUN=7,7,7;LEN=1,2,1;MLLD=7.18533,8.26871,10.4331;OALT=-,-,C;OID=.,.,.;OMAPALT=CA,C,CCA;OPOS=115072,115072,115072;OREF=A,AA,A;QD=20.2284;RBI=0.22432,0.116948,0.159408;REFB=0.00572726,0.00832472,0.00647885;REVB=0.223142,0.115939,0.158445;RO=16;SAF=15,5,1;SAR=17,0,3;…	GT:GQ:DP:FDP:RO:FRO:AO:FAO:AF:SAR:SAF:SRF:SRR:FSAR:FSAF:FSRF:FSRR	0/1:4:63:65:16:0:32,5,4:65,0,0:1,0,0:17,0,3:15,5,1:9:7:30,0,0:35,0,0:0:0
S000003729	YJL193W	None	None	None	Putative protein of unknown function	Putative protein of unknown function; predicted to encode a triose phosphate transporter subfamily member based on phylogenetic analysis; similar to YOR307C/SLY41; deletion mutant has a respiratory growth defect	402	45954.7	YJL193W	chr10	75099	.	AATT	AA,AAT,A,AT	361.273	PASS	AF=0,1,0,0;AO=4,35,3,3;DP=57;FAO=0,56,0,0;FDP=56;FR=.;FRO=0;FSAF=0,33,0,0;FSAR=0,23,0,0;FSRF=0;FSRR=0;FWDB=-0.0336417,-0.0653785,-0.0492238,-0.0862157;FXX=0.0666556;HRUN=7,7,2,2;LEN=2,1,3,2;MLLD=8.83911,8.5355,16.4302,11.3481;OALT=-,-,-,-;OID=.,.,.,.;OMAPALT=AA,AAT,A,AT;OPOS=75101,75101,75100,75100;OREF=TT,T,ATT,AT;QD=25.8052;RBI=0.0684984,0.129622,0.0887047,0.140817;REFB=0,0,0,0;REVB=-0.059668,-…	GT:GQ:DP:FDP:RO:FRO:AO:FAO:AF:SAR:SAF:SRF:SRR:FSAR:FSAF:FSRF:FSRR	0/2:3:57:56:6:0:4,35,3,3:0,56,0,0:0,1,0,0:2,9,3,3:2,26,0,0:4:2:0,23,0,0:0,33,0,0:0:0
S000003859	YJR098C	None	None	None	Putative protein of unknown function	Putative protein of unknown function; the authentic, non-tagged protein is detected in highly purified mitochondria in high-throughput studies	656	74233.8	YJR098C	chr10	628416	.	G	GT,GTT	897.786	PASS	AF=1,0;AO=63,4;DP=73;FAO=65,0;FDP=65;FR=.;FRO=0;FSAF=31,0;FSAR=34,0;FSRF=0;FSRR=0;FWDB=0.0405271,0.0225673;FXX=0.0441112;HRUN=2,2;LEN=1,2;MLLD=22.38,7.77031;OALT=T,TT;OID=.,.;OMAPALT=GT,GTT;OPOS=628417,628417;OREF=-,-;QD=55.2483;RBI=0.13163,0.0723898;REFB=0,0;REVB=-0.125236,-0.0687823;RO=6;SAF=31,3;SAR=32,1;SRF=1;SRR=5;SSEN=0,0;SSEP=0,0;SSSB=0.0533329,0.508365;STB=0.5,0.5;STBP=1,1;TYPE=ins,ins;VA…	GT:GQ:DP:FDP:RO:FRO:AO:FAO:AF:SAR:SAF:SRF:SRR:FSAR:FSAF:FSRF:FSRR	1/1:5:73:65:6:0:63,4:65,0:1,0:32,1:31,3:1:5:34,0:31,0:0:0
S000003859	YJR098C	None	None	None	Putative protein of unknown function	Putative protein of unknown function; the authentic, non-tagged protein is detected in highly purified mitochondria in high-throughput studies	656	74233.8	YJR098C	chr10	628419	.	C	CT,T	964.356	PASS	AF=0.942029,0.057971;AO=63,3;DP=68;FAO=65,4;FDP=69;FR=.;FRO=0;FSAF=31,4;FSAR=34,0;FSRF=0;FSRR=0;FWDB=-0.0831582,0.0100626;FXX=0;HRUN=2,1;LEN=1,1;MLLD=27.07,269.461;OALT=T,T;OID=.,.;OMAPALT=CT,T;OPOS=628420,628419;OREF=-,C;QD=55.9047;RBI=0.150441,0.0151166;REFB=0,0;REVB=-0.125369,0.0112807;RO=1;SAF=30,3;SAR=33,0;SRF=1;SRR=0;SSEN=0,0;SSEP=0,0;SSSB=-0.0154807,0;STB=0.5,0.5;STBP=1,1;TYPE=ins,snp;VARB…	GT:GQ:DP:FDP:RO:FRO:AO:FAO:AF:SAR:SAF:SRF:SRR:FSAR:FSAF:FSRF:FSRR	1/2:14:68:69:1:0:63,3:65,4:0.942029,0.057971:33,0:30,3:1:0:34,0:31,4:0:0
S000003977	YLL054C	None	None	None	Putative protein of unknown function with similarity to Pip2p	Putative protein of unknown function with similarity to Pip2p; an oleate-specific transcriptional activator of peroxisome proliferation; YLL054C is not an essential gene	843	97601	YLL054C	chr12	34586	.	AAATATTCCAAACTTAGAATGTCAGAATCTCCTTCTGGAATC	A	274.107	PASS	AF=1;AO=20;DP=25;FAO=20;FDP=20;FR=.;FRO=0;FSAF=6;FSAR=14;FSRF=0;FSRR=0;FWDB=-0.00892801;FXX=0.19992;HRUN=3;LEN=41;MLLD=1163.94;OALT=-;OID=.;OMAPALT=A;OPOS=34587;OREF=AATATTCCAAACTTAGAATGTCAGAATCTCCTTCTGGAATC;QD=54.8213;RBI=0.0124261;REFB=0;REVB=0.00864287;RO=0;SAF=6;SAR=14;SRF=0;SRR=0;SSEN=0;SSEP=0;SSSB=-3.5931e-08;STB=0.5;STBP=1;TYPE=del;VARB=-2.21717e-07;ANN=A|frameshift_variant|HIGH|YLL054C|YL…	GT:GQ:DP:FDP:RO:FRO:AO:FAO:AF:SAR:SAF:SRF:SRR:FSAR:FSAF:FSRF:FSRR	1/1:3:25:20:0:0:20:20:1:14:6:0:0:14:6:0:0
S000003329	YGR097W	ASK10	Activator of SKn7	RGC2	Regulator of the Fps1p glycerol channel	Regulator of the Fps1p glycerol channel; under nonstress conditions, binds to Fps1p to positively regulate glycerol transport; under osmotic stress, multiple phosphorylation by Hog1p causes Ask10p to dissociate from Fps1p; forms homodimers and heterodimerizes with paralog Rgc1p; phosphorylated in response to oxidative stress; has a role in destruction of Ssn8p; associates with RNA polymerase II h…	1146	126895	YGR097W	chr07	687198	.	C	CA	1223.75	PASS	AF=1;AO=79;DP=80;FAO=80;FDP=80;FR=.;FRO=0;FSAF=37;FSAR=43;FSRF=0;FSRR=0;FWDB=-0.00721508;FXX=0;HRUN=0;LEN=1;MLLD=106.035;OALT=A;OID=.;OMAPALT=CA;OPOS=687199;OREF=-;QD=61.1875;RBI=0.00752628;REFB=0;REVB=-0.00214186;RO=1;SAF=37;SAR=42;SRF=0;SRR=1;SSEN=0;SSEP=0;SSSB=0.0111386;STB=0.5;STBP=1;TYPE=ins;VARB=-4.32808e-05;ANN=CA|frameshift_variant|HIGH|YGR097W|YGR097W|transcript|TRANSCRIPT_YGR097W|protei…	GT:GQ:DP:FDP:RO:FRO:AO:FAO:AF:SAR:SAF:SRF:SRR:FSAR:FSAF:FSRF:FSRR	1/1:7:80:80:1:0:79:80:1:42:37:0:1:43:37:0:0
S000003658	YJL122W	ALB1	Arx1 Little Brother	None	Shuttling pre-60S factor	Shuttling pre-60S factor; involved in the biogenesis of ribosomal large subunit; interacts directly with Arx1p; responsible for Tif6p recycling defects in absence of Rei1p	175	19301.4	YJL122W	chr10	193473	.	A	AT	1213.23	PASS	AF=0.97561;AO=79;DP=88;FAO=80;FDP=82;FR=.;FRO=2;FSAF=44;FSAR=36;FSRF=0;FSRR=2;FWDB=0.0101619;FXX=0.0465062;HRUN=0;LEN=1;MLLD=320.503;OALT=T;OID=.;OMAPALT=AT;OPOS=193474;OREF=-;QD=59.1819;RBI=0.0102936;REFB=-0.0546805;REVB=0.00164124;RO=8;SAF=43;SAR=36;SRF=1;SRR=7;SSEN=0;SSEP=0;SSSB=0.0727979;STB=0.51351;STBP=0.149;TYPE=ins;VARB=0.00112867;ANN=AT|frameshift_variant|HIGH|YJL122W|YJL122W|transcript|…	GT:GQ:DP:FDP:RO:FRO:AO:FAO:AF:SAR:SAF:SRF:SRR:FSAR:FSAF:FSRF:FSRR	0/1:4:88:82:8:2:79:80:0.97561:36:43:1:7:36:44:0:2
S000000572	YCL067C	HMLALPHA2	Hidden Mat Left ALPHA	homeodomain mating type protein alpha2 ALPHA2	Silenced copy of ALPHA2 at HML	Silenced copy of ALPHA2 at HML; homeobox-domain protein that associates with Mcm1p in haploid cells to repress a-specific gene expression and interacts with a1p in diploid cells to repress haploid-specific gene expression	210	24291.4	YCL067C	chr03	13001	.	C	CT	440.801	PASS	AF=1;AO=3;DP=70;FAO=70;FDP=70;FR=.;FRO=0;FSAF=32;FSAR=38;FSRF=0;FSRR=0;FWDB=-0.121263;FXX=0;HRUN=3;LEN=1;MLLD=7.82824;OALT=T;OID=.;OMAPALT=CT;OPOS=13002;OREF=-;QD=25.1886;RBI=0.128965;REFB=0;REVB=-0.0438995;RO=67;SAF=2;SAR=1;SRF=30;SRR=37;SSEN=0;SSEP=0;SSSB=0.178475;STB=0.5;STBP=1;TYPE=ins;VARB=0.00837287;ANN=CT|frameshift_variant|HIGH|YCL067C|YCL067C|transcript|TRANSCRIPT_YCL067C|protein_coding|…	GT:GQ:DP:FDP:RO:FRO:AO:FAO:AF:SAR:SAF:SRF:SRR:FSAR:FSAF:FSRF:FSRR	1/1:3:70:70:67:0:3:70:1:1:2:30:37:38:32:0:0
S000001609	YKL126W	YPK1	Yeast Protein Kinase	SLI2 serine/threonine protein kinase YPK1	S/T protein kinase	S/T protein kinase; phosphorylates, downregulates flippase activator Fpk1p; inactivates Orm1p and Orm2p by phosphorylation in response to compromised sphingolipid synthesis; involved in the TORC-dependent phosphorylation of ribosomal proteins Rps6a/b (S6); mutations affect receptor-mediated endocytosis and sphingolipid-mediated and cell integrity signaling pathways; human homolog SGK1 can complem…	680	76473.4	YKL126W	chr11	212853	.	GC	CA,GCA	1044.98	PASS	AF=0.028169,0.971831;AO=2,65;DP=71;FAO=2,69;FDP=71;FR=.;FRO=0;FSAF=2,47;FSAR=0,22;FSRF=0;FSRR=0;FWDB=-0.0141045,-0.0134;FXX=0;HRUN=3,0;LEN=2,1;MLLD=266.498,293.604;OALT=CA,A;OID=.,.;OMAPALT=CA,GCA;OPOS=212853,212855;OREF=GC,-;QD=58.8723;RBI=0.014135,0.0147493;REFB=0,0;REVB=-0.000928962,-0.00616309;RO=1;SAF=2,44;SAR=0,21;SRF=1;SRR=0;SSEN=0,0;SSEP=0,0;SSSB=0,-0.0106171;STB=0.5,0.5;STBP=1,1;TYPE=mnp…	GT:GQ:DP:FDP:RO:FRO:AO:FAO:AF:SAR:SAF:SRF:SRR:FSAR:FSAF:FSRF:FSRR	1/2:5:71:71:1:0:2,65:2,69:0.028169,0.971831:0,21:2,44:1:0:0,22:2,47:0:0
S000004376	YLR384C	IKI3	Insensitive to KIller toxin	TOT1 ELP1 KTI7 Elongator subunit IKI3	Subunit of Elongator complex	Subunit of Elongator complex; Elongator is required for modification of wobble nucleosides in tRNA; maintains structural integrity of Elongator; homolog of human IKAP, mutations in which cause familial dysautonomia (FD)	1349	152930	YLR384C	chr12	882929	.	C	CT,CTT,T	1230.73	PASS	AF=0.951807,0.0120482,0.0361446;AO=74,5,6;DP=88;FAO=79,1,3;FDP=83;FR=.;FRO=0;FSAF=43,1,1;FSAR=36,0,2;FSRF=0;FSRR=0;FWDB=-0.0956368,-0.0489776,0.0187437;FXX=0.0568117;HRUN=1,1,1;LEN=1,2,1;MLLD=29.2024,8.12901,265.021;OALT=T,TT,T;OID=.,.,.;OMAPALT=CT,CTT,T;OPOS=882930,882930,882929;OREF=-,-,C;QD=59.3124;RBI=0.0956727,0.0489962,0.0209232;REFB=0,0,0;REVB=0.00261996,0.00134654,0.00929813;RO=3;SAF=39,5…	GT:GQ:DP:FDP:RO:FRO:AO:FAO:AF:SAR:SAF:SRF:SRR:FSAR:FSAF:FSRF:FSRR	1/3:7:88:83:3:0:74,5,6:79,1,3:0.951807,0.0120482,0.0361446:35,0,3:39,5,3:0:3:36,0,2:43,1,1:0:0
S000006068	YPL147W	PXA1	PeroXisomal ABC-transporter	LPI1 PAL1 PAT2 SSH2 ATP-binding cassette long-chain fatty acid transporter PXA1	Subunit of heterodimeric peroxisomal ABC transport complex, with Pxa2p	Subunit of heterodimeric peroxisomal ABC transport complex, with Pxa2p; required for import of long-chain fatty acids into peroxisomes; similar to human adrenoleukodystrophy transporters ABCD1and ABCD2, and ALD-related proteins; mutations in ABCD1 cause X-linked adrenoleukodystrophy (X-ALD), a peroxisomal disorder; human ABCD1 and ABCD2 can each partially complement yeast pxa1 pxa2 double null mu…	870	100058	YPL147W	chr16	275245	.	A	AC	1030.46	PASS	AF=1;AO=69;DP=71;FAO=70;FDP=70;FR=.;FRO=0;FSAF=32;FSAR=38;FSRF=0;FSRR=0;FWDB=-0.0512713;FXX=0;HRUN=1;LEN=1;MLLD=30.6123;OALT=C;OID=.;OMAPALT=AC;OPOS=275246;OREF=-;QD=58.8832;RBI=0.0921035;REFB=0;REVB=0.0765134;RO=2;SAF=31;SAR=38;SRF=2;SRR=0;SSEN=0;SSEP=0;SSSB=-0.0295207;STB=0.5;STBP=1;TYPE=ins;VARB=0.000540285;ANN=AC|frameshift_variant|HIGH|YPL147W|YPL147W|transcript|TRANSCRIPT_YPL147W|protein_co…	GT:GQ:DP:FDP:RO:FRO:AO:FAO:AF:SAR:SAF:SRF:SRR:FSAR:FSAF:FSRF:FSRR	1/1:6:71:70:2:0:69:70:1:38:31:2:0:38:32:0:0
S000001337	YIL075C	RPN2	Regulatory Particle Non-ATPase	SEN3 proteasome regulatory particle base subunit RPN2	Subunit of the 26S proteasome	Subunit of the 26S proteasome; substrate of the N-acetyltransferase Nat1p; protein abundance increases in response to DNA replication stress	945	104223	YIL075C	chr09	220098	.	C	CA	467.005	PASS	AF=1;AO=52;DP=91;FAO=84;FDP=84;FR=.;FRO=0;FSAF=41;FSAR=43;FSRF=0;FSRR=0;FWDB=0.0747169;FXX=0.0561735;HRUN=5;LEN=1;MLLD=7.26784;OALT=A;OID=.;OMAPALT=CA;OPOS=220099;OREF=-;QD=22.2383;RBI=0.0901973;REFB=0.179817;REVB=-0.0505266;RO=35;SAF=28;SAR=24;SRF=14;SRR=21;SSEN=0;SSEP=0;SSSB=0.101819;STB=0.5;STBP=1;TYPE=ins;VARB=0.00581598;ANN=CA|frameshift_variant&stop_lost|HIGH|YIL075C|YIL075C|transcript|TRAN…	GT:GQ:DP:FDP:RO:FRO:AO:FAO:AF:SAR:SAF:SRF:SRR:FSAR:FSAF:FSRF:FSRR	0/1:3:91:84:35:0:52:84:1:24:28:14:21:43:41:0:0
S000004085	YLR095C	IOC2	Iswi One Complex	None	Subunit of the Isw1b complex	Subunit of the Isw1b complex; exhibits nucleosome-stimulated ATPase activity and acts within coding regions to coordinate transcription elongation with termination and processing; contains a PHD finger motif; other complex members are Isw1p and Ioc4p	812	93424.9	YLR095C	chr12	330654	.	TGTT	TGCT,T,TGTTGCT	959.656	PASS	AF=0,0,1;AO=2,4,59;DP=67;FAO=0,0,65;FDP=65;FR=.;FRO=0;FSAF=0,0,24;FSAR=0,0,41;FSRF=0;FSRR=0;FWDB=-0.0307382,0.00798918,0.00803708;FXX=0.0298463;HRUN=2,1,1;LEN=1,3,3;MLLD=126.482,304.59,309.407;OALT=C,-,TGC;OID=.,.,.;OMAPALT=TGCT,T,TGTTGCT;OPOS=330656,330655,330657;OREF=T,GTT,-;QD=59.0557;RBI=0.0372184,0.0284742,0.0285698;REFB=0,0,0;REVB=0.0209851,0.0273304,0.027416;RO=0;SAF=2,3,20;SAR=0,1,39;SRF=…	GT:GQ:DP:FDP:RO:FRO:AO:FAO:AF:SAR:SAF:SRF:SRR:FSAR:FSAF:FSRF:FSRR	3/3:5:67:65:0:0:2,4,59:0,0,65:0,0,1:0,1,39:2,3,20:0:0:0,0,41:0,0,24:0:0
S000001160	YHR118C	ORC6	Origin Recognition Complex	origin recognition complex subunit 6	Subunit of the origin recognition complex (ORC)	Subunit of the origin recognition complex (ORC); ORC directs DNA replication by binding to replication origins and is also involved in transcriptional silencing; phosphorylated by Cdc28p; mutation in the human Orc6p is linked to Meier-Gorlin syndrome	435	50299.3	YHR118C	chr08	339255	.	GTTTAT	GTTAT,GTTATA	1187.42	PASS	AF=0.987342,0.0126582;AO=77,2;DP=79;FAO=78,1;FDP=79;FR=.;FRO=0;FSAF=38,0;FSAR=40,1;FSRF=0;FSRR=0;FWDB=0.00520668,-0.0561772;FXX=0;HRUN=3,3;LEN=1,3;MLLD=33.0074,8.29323;OALT=-,ATA;OID=.,.;OMAPALT=GTTAT,GTTATA;OPOS=339256,339258;OREF=T,TAT;QD=60.1223;RBI=0.0152643,0.0564214;REFB=0,0;REVB=-0.0143489,0.00524369;RO=0;SAF=37,1;SAR=40,1;SRF=0;SRR=0;SSEN=0,0;SSEP=0,0;SSSB=0,0;STB=0.5,0.5;STBP=1,1;TYPE=de…	GT:GQ:DP:FDP:RO:FRO:AO:FAO:AF:SAR:SAF:SRF:SRR:FSAR:FSAF:FSRF:FSRR	1/1:3:79:79:0:0:77,2:78,1:0.987342,0.0126582:40,1:37,1:0:0:40,1:38,0:0:0
S000001937	YFR041C	ERJ5	Endoplasmic Reticulum located J-protein	None	Type I membrane protein with a J domain	Type I membrane protein with a J domain; required to preserve the folding capacity of the endoplasmic reticulum; loss of the non-essential ERJ5 gene leads to a constitutively induced unfolded protein response	295	34215.9	YFR041C	chr06	243279	.	A	AG,G	1266.08	PASS	AF=0.975904,0.0240964;AO=81,2;DP=85;FAO=81,2;FDP=83;FR=.;FRO=0;FSAF=32,1;FSAR=49,1;FSRF=0;FSRR=0;FWDB=-0.000341821,-0.00107515;FXX=0;HRUN=0,4;LEN=1,1;MLLD=329.831,303.438;OALT=G,G;OID=.,.;OMAPALT=AG,G;OPOS=243280,243279;OREF=-,A;QD=61.0159;RBI=0.00994396,0.00965726;REFB=0,0;REVB=-0.00993809,-0.00959723;RO=2;SAF=32,1;SAR=49,1;SRF=0;SRR=2;SSEN=0,0;SSEP=0,0;SSSB=0.0189339,0.390188;STB=0.5,0.5;STBP=1…	GT:GQ:DP:FDP:RO:FRO:AO:FAO:AF:SAR:SAF:SRF:SRR:FSAR:FSAF:FSRF:FSRR	1/2:4:85:83:2:0:81,2:81,2:0.975904,0.0240964:49,1:32,1:0:2:49,1:32,1:0:0
S000002476	YDR069C	DOA4	Degradation Of Alpha	NPI2 UBP4 ubiquitin-specific protease DOA4 DOS1 SSV7 MUT4	Ubiquitin hydrolase	Ubiquitin hydrolase; deubiquitinates intralumenal vesicle (ILVs) cargo proteins; required for recycling ubiquitin from proteasome-bound ubiquitinated intermediates, acts at the late endosome/prevacuolar compartment to recover ubiquitin from ubiquitinated membrane proteins destined for the vacuole; DOA4 has a paralog, UBP5, that arose from the whole genome duplication	926	105201	YDR069C	chr04	594973	.	G	A	1302.17	PASS	AF=1;AO=84;DP=84;FAO=84;FDP=84;FR=.;FRO=0;FSAF=42;FSAR=42;FSRF=0;FSRR=0;FWDB=0.00305;FXX=0;HRUN=1;LEN=1;MLLD=241.094;OALT=A;OID=.;OMAPALT=A;OPOS=594973;OREF=G;QD=62.0082;RBI=0.00306217;REFB=0;REVB=0.00027278;RO=0;SAF=42;SAR=42;SRF=0;SRR=0;SSEN=0;SSEP=0;SSSB=0;STB=0.5;STBP=1;TYPE=snp;VARB=5.004e-06;ANN=A|stop_gained|HIGH|YDR069C|YDR069C|transcript|TRANSCRIPT_YDR069C|protein_coding|1/1|c.1876C>T|p.…	GT:GQ:DP:FDP:RO:FRO:AO:FAO:AF:SAR:SAF:SRF:SRR:FSAR:FSAF:FSRF:FSRR	1/1:7:84:84:0:0:84:84:1:42:42:0:0:42:42:0:0
S000003307	YGR075C	PRP38	Pre-mRNA Processing	U4/U6-U5 snRNP complex subunit PRP38	Unique component of the U4/U6.U5 tri-snRNP particle	Unique component of the U4/U6.U5 tri-snRNP particle; tri-snRNP is required for conformational changes which result in the catalytic activation of the spliceosome; dispensable for spliceosome assembly	242	27956.9	YGR075C	chr07	643186	.	C	T	1396.43	PASS	AF=1;AO=89;DP=89;FAO=89;FDP=89;FR=.;FRO=0;FSAF=52;FSAR=37;FSRF=0;FSRR=0;FWDB=0.00685652;FXX=0;HRUN=1;LEN=1;MLLD=196.893;OALT=T;OID=.;OMAPALT=T;OPOS=643186;OREF=C;QD=62.7609;RBI=0.012182;REFB=0;REVB=0.0100692;RO=0;SAF=52;SAR=37;SRF=0;SRR=0;SSEN=0;SSEP=0;SSSB=0;STB=0.5;STBP=1;TYPE=snp;VARB=3.54169e-05;ANN=T|missense_variant|MODERATE|YGR075C|YGR075C|transcript|TRANSCRIPT_YGR075C|protein_coding|1/1|c…	GT:GQ:DP:FDP:RO:FRO:AO:FAO:AF:SAR:SAF:SRF:SRR:FSAR:FSAF:FSRF:FSRR	1/1:7:89:89:0:0:89:89:1:37:52:0:0:37:52:0:0
S000001392	YIL130W	ASG1	Activator of Stress Genes	None	Zinc cluster protein proposed to be a transcriptional regulator	Zinc cluster protein proposed to be a transcriptional regulator; regulator involved in the stress response; null mutants have a respiratory deficiency, calcofluor white sensitivity and slightly increased cycloheximide resistance	964	108770	YIL130W	chr09	106882	.	T	TAATA	479.895	PASS	AF=1;AO=2;DP=40;FAO=38;FDP=38;FR=.;FRO=0;FSAF=18;FSAR=20;FSRF=0;FSRR=0;FWDB=0.102212;FXX=0.0256345;HRUN=1;LEN=4;MLLD=188.564;OALT=AATA;OID=.;OMAPALT=TAATA;OPOS=106883;OREF=-;QD=50.5153;RBI=0.112448;REFB=0;REVB=0.0468759;RO=38;SAF=2;SAR=0;SRF=18;SRR=20;SSEN=0;SSEP=0;SSSB=0.433958;STB=0.5;STBP=1;TYPE=ins;VARB=0.00305821;ANN=TAATA|frameshift_variant&stop_gained|HIGH|YIL130W|YIL130W|transcript|TRANSC…	GT:GQ:DP:FDP:RO:FRO:AO:FAO:AF:SAR:SAF:SRF:SRR:FSAR:FSAF:FSRF:FSRR	1/1:4:40:38:38:0:2:38:1:0:2:18:20:20:18:0:0

## Sheet: doa4-13 mutant
SGDID	Systematic	Gene	Gene Name	Alias	Short Description	Description	Length	MW	Systematics	CHROM	POS	ID	REF	ALT	QUAL	FILTER	INFO	GT	AD
S000005265	YNL321W	VNX1	Vacuolar Na+/H+ eXchanger	None	Calcium/H+ antiporter localized to the endoplasmic reticulum membrane	Calcium/H+ antiporter localized to the endoplasmic reticulum membrane; member of the calcium exchanger (CAX) family; potential Cdc28p substrate	908	102494	YNL321W	chr14	46010	.	CAAAAAAAG	CAAAAA,CAAAAAAG,CAAAAAAGG,CAAAAAG	876.356	PASS	AF=0,1,0,0;AO=10,95,15,15;DP=185;FAO=0,166,0,0;FDP=166;FR=.;FRO=0;FSAF=0,87,0,0;FSAR=0,79,0,0;FSRF=0;FSRR=0;FWDB=-0.0549556,0.0894237,0.217812,0.0458119;FXX=0.023528;HRUN=7,7,7,7;LEN=3,1,1,2;MLLD=22.3958,7.60511,11.698,8.67431;OALT=-,-,G,-;OID=.,.,.,.;OMAPALT=CAAAAA,CAAAAAAG,CAAAAAAGG,CAAAAAG;OPOS=46016,46011,46017,46011;OREF=AAG,A,A,AA;QD=21.117;RBI=0.0859942,0.166944,0.222627,0.0847038;REFB=0.0…	GT:GQ:DP:FDP:RO:FRO:AO:FAO:AF:SAR:SAF:SRF:SRR:FSAR:FSAF:FSRF:FSRR	2/2:3:185:166:40:0:10,95,15,15:0,166,0,0:0,1,0,0:0,54,12,4:10,41,3,11:20:20:0,79,0,0:0,87,0,0:0:0
S000004109	YLR119W	SRN2	Suppressor of Rna mutations, Number 2	VPL16 ESCRT-I subunit protein SRN2 VPS37 SRN10	Component of the ESCRT-I complex	Component of the ESCRT-I complex; ESCRT-I is involved in ubiquitin-dependent sorting of proteins into the endosome; suppressor of rna1-1 mutation; may be involved in RNA export from nucleus	213	25106	YLR119W	chr12	386480	.	G	A,GA,GAA	1430.45	PASS	AF=0,0,1;AO=3,9,84;DP=108;FAO=0,0,99;FDP=99;FR=.;FRO=0;FSAF=0,0,51;FSAR=0,0,48;FSRF=0;FSRR=0;FWDB=0.00687766,0.112455,0.0584647;FXX=0.0294089;HRUN=2,3,3;LEN=1,1,2;MLLD=18.6057,18.3309,31.6154;OALT=A,A,AA;OID=.,.,.;OMAPALT=A,GA,GAA;OPOS=386480,386481,386481;OREF=G,-,-;QD=57.7961;RBI=0.0284196,0.116636,0.0604305;REFB=0,0,0;REVB=0.0275748,0.0309477,0.0152881;RO=9;SAF=2,7,39;SAR=1,2,45;SRF=7;SRR=2;SS…	GT:GQ:DP:FDP:RO:FRO:AO:FAO:AF:SAR:SAF:SRF:SRR:FSAR:FSAF:FSRF:FSRR	3/3:8:108:99:9:0:3,9,84:0,0,99:0,0,1:1,2,45:2,7,39:7:2:0,0,48:0,0,51:0:0
S000004322	YLR330W	CHS5	CHitin Synthase-related	CAL3	Component of the exomer complex	Component of the exomer complex; the exomer which also contains Csh6p, Bch1p, Bch2p, and Bud7, is involved in the export of select proteins, such as chitin synthase Chs3p, from the Golgi to the plasma membrane; interacts selectively with the activated, GTP-bound form of Arf1p; Chs5p is the only protein with a BRCT domain that is not localized to the nucleus	671	73568.9	YLR330W	chr12	781889	.	G	A	2118.32	PASS	AF=0.978571;AO=137;DP=140;FAO=137;FDP=140;FR=.;FRO=3;FSAF=76;FSAR=61;FSRF=1;FSRR=2;FWDB=0.145128;FXX=0;HRUN=2;LEN=1;MLLD=58.9924;OALT=A;OID=.;OMAPALT=A;OPOS=781889;OREF=G;QD=60.5234;RBI=0.163599;REFB=-0.180977;REVB=0.0755139;RO=3;SAF=76;SAR=61;SRF=1;SRR=2;SSEN=0;SSEP=0;SSSB=0.00911593;STB=0.504796;STBP=0.471;TYPE=snp;VARB=0.0114385;ANN=A|missense_variant|MODERATE|YLR330W|YLR330W|transcript|TRANSC…	GT:GQ:DP:FDP:RO:FRO:AO:FAO:AF:SAR:SAF:SRF:SRR:FSAR:FSAF:FSRF:FSRR	1/1:3:140:140:3:3:137:137:0.978571:61:76:1:2:61:76:1:2
S000003398	YGR166W	TRS65	TRapp Subunit	KRE11	Component of transport protein particle (TRAPP) complex II	Component of transport protein particle (TRAPP) complex II; TRAPPII is a multimeric guanine nucleotide-exchange factor for the GTPase Ypt1p, regulating intra-Golgi and endosome-Golgi traffic; role in cell wall beta-glucan biosynthesis and the stress response	560	63377.5	YGR166W	chr07	842714	.	T	TC	1683.22	PASS	AF=1;AO=6;DP=170;FAO=165;FDP=165;FR=.;FRO=0;FSAF=81;FSAR=84;FSRF=0;FSRR=0;FWDB=0.222594;FXX=0.00602373;HRUN=4;LEN=1;MLLD=15.1293;OALT=C;OID=.;OMAPALT=TC;OPOS=842715;OREF=-;QD=40.8052;RBI=0.226918;REFB=-0.0310117;REVB=-0.0440876;RO=164;SAF=0;SAR=6;SRF=83;SRR=81;SSEN=0;SSEP=0;SSSB=-0.406889;STB=0.5;STBP=1;TYPE=ins;VARB=0.0119645;ANN=TC|frameshift_variant|HIGH|YGR166W|YGR166W|transcript|TRANSCRIPT_Y…	GT:GQ:DP:FDP:RO:FRO:AO:FAO:AF:SAR:SAF:SRF:SRR:FSAR:FSAF:FSRF:FSRR	1/1:6:170:165:164:0:6:165:1:6:0:83:81:84:81:0:0
S000001699	YKL216W	URA1	URAcil requiring	dihydroorotate dehydrogenase	Dihydroorotate dehydrogenase	Dihydroorotate dehydrogenase; catalyzes the fourth enzymatic step in the de novo biosynthesis of pyrimidines, converting dihydroorotic acid into orotic acid	314	34798.2	YKL216W	chr11	25789	.	TTC	TCA,TTCAA,TTCA	1822.77	PASS	AF=0,0,1;AO=11,13,139;DP=195;FAO=0,0,192;FDP=192;FR=.;FRO=0;FSAF=0,0,109;FSAR=0,0,83;FSRF=0;FSRR=0;FWDB=0.00929398,-0.0370589,-0.0720662;FXX=0.0153838;HRUN=5,5,5;LEN=2,2,1;MLLD=7.02706,9.67888,12.4447;OALT=CA,AA,A;OID=.,.,.;OMAPALT=TCA,TTCAA,TTCA;OPOS=25790,25792,25792;OREF=TC,-,-;QD=37.9744;RBI=0.109899,0.0449237,0.0878144;REFB=0.0089859,0.0488614,0.0379505;REVB=-0.109505,-0.0253925,-0.050178;RO…	GT:GQ:DP:FDP:RO:FRO:AO:FAO:AF:SAR:SAF:SRF:SRR:FSAR:FSAF:FSRF:FSRR	3/3:7:195:192:9:0:11,13,139:0,0,192:0,0,1:11,8,54:0,5,85:8:1:0,0,83:0,0,109:0:0
S000001260	YHR217C	None	None	None	Dubious open reading frame	Dubious open reading frame; unlikely to encode a functional protein, based on available experimental and comparative sequence data; located in the telomeric region TEL08R	153	17082.8	YHR217C	chr08	554778	.	GAT	GTA,TGG	1162.29	PASS	AF=0.963415,0.0243902;AO=69,2;DP=86;FAO=79,2;FDP=82;FR=.;FRO=1;FSAF=28,0;FSAR=51,2;FSRF=0;FSRR=1;FWDB=0.00766033,-0.0195516;FXX=0.0574647;HRUN=1,3;LEN=2,3;MLLD=82.6045,151.542;OALT=TA,TGG;OID=.,.;OMAPALT=GTA,TGG;OPOS=554779,554778;OREF=AT,GAT;QD=56.6971;RBI=0.0349093,0.0196825;REFB=-0.106449,-0.0580585;REVB=0.0340584,-0.00226628;RO=1;SAF=20,0;SAR=49,2;SRF=0;SRR=1;SSEN=0,0;SSEP=0,0;SSSB=0.00955148…	GT:GQ:DP:FDP:RO:FRO:AO:FAO:AF:SAR:SAF:SRF:SRR:FSAR:FSAF:FSRF:FSRR	1/2:5:86:82:1:1:69,2:79,2:0.963415,0.0243902:49,2:20,0:0:1:51,2:28,0:0:1
S000001260	YHR217C	None	None	None	Dubious open reading frame	Dubious open reading frame; unlikely to encode a functional protein, based on available experimental and comparative sequence data; located in the telomeric region TEL08R	153	17082.8	YHR217C	chr08	555107	.	AT	A,AA,GA	984.279	PASS	AF=0.985075,0.0149254,0;AO=62,3,2;DP=67;FAO=66,1,0;FDP=67;FR=.;FRO=0;FSAF=30,0,0;FSAR=36,1,0;FSRF=0;FSRR=0;FWDB=-0.00487246,-0.0037237,-0.00439574;FXX=0;HRUN=1,1,1;LEN=1,1,2;MLLD=228.424,198.83,151.166;OALT=-,A,GA;OID=.,.,.;OMAPALT=A,AA,GA;OPOS=555108,555108,555107;OREF=T,T,AT;QD=58.7629;RBI=0.0320559,0.0367998,0.00591658;REFB=0,0,0;REVB=0.0316834,0.036611,0.00396022;RO=0;SAF=30,0,0;SAR=32,3,2;SR…	GT:GQ:DP:FDP:RO:FRO:AO:FAO:AF:SAR:SAF:SRF:SRR:FSAR:FSAF:FSRF:FSRR	1/1:3:67:67:0:0:62,3,2:66,1,0:0.985075,0.0149254,0:32,3,2:30,0,0:0:0:36,1,0:30,0,0:0:0
S000001260	YHR217C	None	None	None	Dubious open reading frame	Dubious open reading frame; unlikely to encode a functional protein, based on available experimental and comparative sequence data; located in the telomeric region TEL08R	153	17082.8	YHR217C	chr08	555113	.	TG	T	800.951	PASS	AF=0.967742;AO=57;DP=62;FAO=60;FDP=62;FR=.;FRO=2;FSAF=27;FSAR=33;FSRF=0;FSRR=2;FWDB=-0.042144;FXX=0;HRUN=2;LEN=1;MLLD=25.5777;OALT=-;OID=.;OMAPALT=T;OPOS=555114;OREF=G;QD=51.6743;RBI=0.0720636;REFB=-0.0689926;REVB=0.0584555;RO=3;SAF=27;SAR=30;SRF=0;SRR=3;SSEN=0;SSEP=0;SSSB=0.0448549;STB=0.514701;STBP=0.259;TYPE=del;VARB=0.00926442;ANN=T|frameshift_variant|HIGH|YHR217C|YHR217C|transcript|TRANSCRIP…	GT:GQ:DP:FDP:RO:FRO:AO:FAO:AF:SAR:SAF:SRF:SRR:FSAR:FSAF:FSRF:FSRR	0/1:5:62:62:3:2:57:60:0.967742:30:27:0:3:33:27:0:2
S000007240	YGR122C-A	None	None	None	Dubious open reading frame	Dubious open reading frame; unlikely to encode a functional protein, based on available experimental and comparative sequence data; similar to YLR334C and YOL106W	42	4633.3	YGR122C-A	chr07	744215	.	A	T	871.237	PASS	AF=0.983871;AO=61;DP=62;FAO=61;FDP=62;FR=.;FRO=1;FSAF=58;FSAR=3;FSRF=1;FSRR=0;FWDB=0.000101734;FXX=0;HRUN=4;LEN=1;MLLD=272.249;OALT=T;OID=.;OMAPALT=T;OPOS=744215;OREF=A;QD=56.2088;RBI=0.0583737;REFB=-0.0243807;REVB=0.0583736;RO=1;SAF=58;SAR=3;SRF=1;SRR=0;SSEN=0;SSEP=0;SSSB=-0.00807156;STB=0.504272;STBP=0.651;TYPE=snp;VARB=0.000659551;ANN=T|missense_variant|MODERATE|YGR122C-A|YGR122C-A|transcript|…	GT:GQ:DP:FDP:RO:FRO:AO:FAO:AF:SAR:SAF:SRF:SRR:FSAR:FSAF:FSRF:FSRR	0/1:3:62:62:1:1:61:61:0.983871:3:58:1:0:3:58:1:0
S000007240	YGR122C-A	None	None	None	Dubious open reading frame	Dubious open reading frame; unlikely to encode a functional protein, based on available experimental and comparative sequence data; similar to YLR334C and YOL106W	42	4633.3	YGR122C-A	chr07	744236	.	T	C	1749.08	PASS	AF=1;AO=115;DP=115;FAO=115;FDP=115;FR=.;FRO=0;FSAF=65;FSAR=50;FSRF=0;FSRR=0;FWDB=0.0136393;FXX=0;HRUN=1;LEN=1;MLLD=141.693;OALT=C;OID=.;OMAPALT=C;OPOS=744236;OREF=T;QD=60.8377;RBI=0.0417137;REFB=0;REVB=0.0394208;RO=0;SAF=65;SAR=50;SRF=0;SRR=0;SSEN=0;SSEP=0;SSSB=3.22929e-08;STB=0.5;STBP=1;TYPE=snp;VARB=9.23276e-05;ANN=C|missense_variant|MODERATE|YGR122C-A|YGR122C-A|transcript|TRANSCRIPT_YGR122C-A|…	GT:GQ:DP:FDP:RO:FRO:AO:FAO:AF:SAR:SAF:SRF:SRR:FSAR:FSAF:FSRF:FSRR	1/1:10:115:115:0:0:115:115:1:50:65:0:0:50:65:0:0
S000007240	YGR122C-A	None	None	None	Dubious open reading frame	Dubious open reading frame; unlikely to encode a functional protein, based on available experimental and comparative sequence data; similar to YLR334C and YOL106W	42	4633.3	YGR122C-A	chr07	744246	.	A	T	1731.3	PASS	AF=1;AO=114;DP=114;FAO=114;FDP=114;FR=.;FRO=0;FSAF=65;FSAR=49;FSRF=0;FSRR=0;FWDB=0.0420948;FXX=0;HRUN=1;LEN=1;MLLD=110.371;OALT=T;OID=.;OMAPALT=T;OPOS=744246;OREF=A;QD=60.7475;RBI=0.0502574;REFB=0;REVB=0.0274559;RO=0;SAF=65;SAR=49;SRF=0;SRR=0;SSEN=0;SSEP=0;SSSB=3.29464e-08;STB=0.5;STBP=1;TYPE=snp;VARB=0.000293126;ANN=T|stop_gained|HIGH|YGR122C-A|YGR122C-A|transcript|TRANSCRIPT_YGR122C-A|protein_c…	GT:GQ:DP:FDP:RO:FRO:AO:FAO:AF:SAR:SAF:SRF:SRR:FSAR:FSAF:FSRF:FSRR	1/1:9:114:114:0:0:114:114:1:49:65:0:0:49:65:0:0
S000007240	YGR122C-A	None	None	None	Dubious open reading frame	Dubious open reading frame; unlikely to encode a functional protein, based on available experimental and comparative sequence data; similar to YLR334C and YOL106W	42	4633.3	YGR122C-A	chr07	744250	.	A	G	1723.68	PASS	AF=1;AO=112;DP=112;FAO=114;FDP=114;FR=.;FRO=0;FSAF=65;FSAR=49;FSRF=0;FSRR=0;FWDB=0.00985537;FXX=0;HRUN=1;LEN=1;MLLD=332.987;OALT=G;OID=.;OMAPALT=G;OPOS=744250;OREF=A;QD=60.4798;RBI=0.0264781;REFB=0;REVB=0.0245756;RO=0;SAF=63;SAR=49;SRF=0;SRR=0;SSEN=0;SSEP=0;SSSB=-3.39806e-08;STB=0.5;STBP=1;TYPE=snp;VARB=1.74128e-05;ANN=G|missense_variant|MODERATE|YGR122C-A|YGR122C-A|transcript|TRANSCRIPT_YGR122C-…	GT:GQ:DP:FDP:RO:FRO:AO:FAO:AF:SAR:SAF:SRF:SRR:FSAR:FSAF:FSRF:FSRR	1/1:9:112:114:0:0:112:114:1:49:63:0:0:49:65:0:0
S000006312	YPR108W	RPN7	Regulatory Particle Non-ATPase	proteasome regulatory particle lid subunit RPN7	Essential non-ATPase regulatory subunit of the 26S proteasome	Essential non-ATPase regulatory subunit of the 26S proteasome; similar to another S. cerevisiae regulatory subunit, Rpn5p, as well as to mammalian proteasome subunits	429	48946.9	YPR108W	chr16	743077	.	CAA	ACA,CA,C	496.41	PASS	AF=0.0840336,0.915966,0;AO=6,61,17;DP=116;FAO=10,109,0;FDP=119;FR=.;FRO=0;FSAF=0,58,0;FSAR=10,51,0;FSRF=0;FSRR=0;FWDB=-0.0326208,-0.0454095,-0.0270986;FXX=0.0165276;HRUN=1,8,8;LEN=2,1,2;MLLD=57.414,6.72134,9.67926;OALT=AC,-,-;OID=.,.,.;OMAPALT=ACA,CA,C;OPOS=743077,743078,743078;OREF=CA,A,AA;QD=16.6861;RBI=0.0954312,0.14982,0.0771243;REFB=0.0166273,0.0402047,0.0284653;REVB=-0.0896828,-0.142773,-0.…	GT:GQ:DP:FDP:RO:FRO:AO:FAO:AF:SAR:SAF:SRF:SRR:FSAR:FSAF:FSRF:FSRR	1/2:27:116:119:24:0:6,61,17:10,109,0:0.0840336,0.915966,0:6,32,6:0,29,11:15:9:10,51,0:0,58,0:0:0
S000004906	YMR292W	GOT1	GOlgi Transport	None	Homodimeric protein that is packaged into COPII vesicles	Homodimeric protein that is packaged into COPII vesicles; cycles between the ER and Golgi; involved in secretory transport but not directly required for aspects of transport assayed in vitro; may influence membrane composition	138	15436.8	YMR292W	chr13	863454	.	T	TG	1851.49	PASS	AF=1;AO=5;DP=136;FAO=127;FDP=127;FR=.;FRO=0;FSAF=70;FSAR=57;FSRF=0;FSRR=0;FWDB=0.068221;FXX=0;HRUN=0;LEN=1;MLLD=270.353;OALT=G;OID=.;OMAPALT=TG;OPOS=863455;OREF=-;QD=58.3146;RBI=0.104024;REFB=0;REVB=-0.0785294;RO=131;SAF=0;SAR=5;SRF=73;SRR=58;SSEN=0;SSEP=0;SSSB=-0.435432;STB=0.5;STBP=1;TYPE=ins;VARB=0.0022153;ANN=TG|frameshift_variant|HIGH|YMR292W|YMR292W|transcript|TRANSCRIPT_YMR292W|protein_cod…	GT:GQ:DP:FDP:RO:FRO:AO:FAO:AF:SAR:SAF:SRF:SRR:FSAR:FSAF:FSRF:FSRR	1/1:11:136:127:131:0:5:127:1:5:0:73:58:57:70:0:0
S000003689	YJL153C	INO1	INOsitol requiring	inositol-3-phosphate synthase INO1 APR1	Inositol-3-phosphate synthase	Inositol-3-phosphate synthase; involved in synthesis of inositol phosphates and inositol-containing phospholipids; transcription is coregulated with other phospholipid biosynthetic genes by Ino2p and Ino4p, which bind the UASINO DNA element	533	59633.6	YJL153C	chr10	139567	.	A	C	3344.1	PASS	AF=1;AO=214;DP=214;FAO=215;FDP=215;FR=.;FRO=0;FSAF=104;FSAR=111;FSRF=0;FSRR=0;FWDB=0.0119834;FXX=0;HRUN=1;LEN=1;MLLD=220.661;OALT=C;OID=.;OMAPALT=C;OPOS=139567;OREF=A;QD=62.2158;RBI=0.0139115;REFB=0;REVB=0.00706591;RO=0;SAF=104;SAR=110;SRF=0;SRR=0;SSEN=0;SSEP=0;SSSB=0;STB=0.5;STBP=1;TYPE=snp;VARB=1.25197e-05;ANN=C|missense_variant|MODERATE|YJL153C|YJL153C|transcript|TRANSCRIPT_YJL153C|protein_cod…	GT:GQ:DP:FDP:RO:FRO:AO:FAO:AF:SAR:SAF:SRF:SRR:FSAR:FSAF:FSRF:FSRR	1/1:18:214:215:0:0:214:215:1:110:104:0:0:111:104:0:0
S000006046	YPL125W	KAP120	KAryoPherin	LPH2	Karyopherin responsible for the nuclear import of Rpf1p	Karyopherin responsible for the nuclear import of Rpf1p; Rpf1p is a ribosome maturation factor	1032	119592	YPL125W	chr16	313743	.	G	GA	2052.88	PASS	AF=1;AO=133;DP=150;FAO=139;FDP=139;FR=.;FRO=0;FSAF=73;FSAR=66;FSRF=0;FSRR=0;FWDB=0.115878;FXX=0.0279701;HRUN=1;LEN=1;MLLD=23.1218;OALT=A;OID=.;OMAPALT=GA;OPOS=313744;OREF=-;QD=59.0757;RBI=0.135052;REFB=0;REVB=0.0693645;RO=13;SAF=68;SAR=65;SRF=3;SRR=10;SSEN=0;SSEP=0;SSSB=0.0472773;STB=0.5;STBP=1;TYPE=ins;VARB=0.0020394;ANN=GA|frameshift_variant|HIGH|YPL125W|YPL125W|transcript|TRANSCRIPT_YPL125W|pr…	GT:GQ:DP:FDP:RO:FRO:AO:FAO:AF:SAR:SAF:SRF:SRR:FSAR:FSAF:FSRF:FSRR	1/1:12:150:139:13:0:133:139:1:65:68:3:10:66:73:0:0
S000005721	YOR195W	SLK19	Synthetic Lethal Kar3p	None	Kinetochore-associated protein	Kinetochore-associated protein; required for chromosome segregation and kinetochore clustering; required for normal segregation of chromosomes in meiosis and mitosis; component of the FEAR regulatory network, which promotes Cdc14p release from the nucleolus during anaphase; potential Cdc28p substrate	821	95325.1	YOR195W	chr15	709674	.	T	TA	2694.03	PASS	AF=1;AO=170;DP=176;FAO=173;FDP=173;FR=.;FRO=0;FSAF=86;FSAR=87;FSRF=0;FSRR=0;FWDB=0.00787268;FXX=0;HRUN=0;LEN=1;MLLD=313.655;OALT=A;OID=.;OMAPALT=TA;OPOS=709675;OREF=-;QD=62.2898;RBI=0.00988126;REFB=0;REVB=-0.00597162;RO=3;SAF=84;SAR=86;SRF=1;SRR=2;SSEN=0;SSEP=0;SSSB=0.00530649;STB=0.5;STBP=1;TYPE=ins;VARB=8.34521e-07;ANN=TA|frameshift_variant|HIGH|YOR195W|YOR195W|transcript|TRANSCRIPT_YOR195W|pro…	GT:GQ:DP:FDP:RO:FRO:AO:FAO:AF:SAR:SAF:SRF:SRR:FSAR:FSAF:FSRF:FSRR	1/1:15:176:173:3:0:170:173:1:86:84:1:2:87:86:0:0
S000002177	YDL019C	OSH2	OxySterol binding protein Homolog	oxysterol-binding protein related protein OSH2	Member of an oxysterol-binding protein family with seven members	Member of an oxysterol-binding protein family with seven members; in S. cerevisiae, family members have overlapping, redundant functions in sterol metabolism and collectively perform a function essential for viability; contains FFAT motif; interacts with ER anchor Scs2p at patches at the plasma membrane and at the nuclear envelope; regulated by sterol binding; OSH2 has a paralog, SWH1, that arose…	1283	145786	YDL019C	chr04	430368	.	CTTTTTTTTG	CTTTTTTG,CTTTTTTTG,CTTTTTTTGT,TCTTTTTTTG	735.644	PASS	AF=0.0175439,0.982456,0,0;AO=16,70,5,3;DP=119;FAO=2,112,0,0;FDP=114;FR=.;FRO=0;FSAF=2,57,0,0;FSAR=0,55,0,0;FSRF=0;FSRR=0;FWDB=0.0866917,0.169164,0.013419,0.130109;FXX=0.0338954;HRUN=8,8,8,1;LEN=2,1,2,2;MLLD=9.16089,8.56436,108.63,12.8789;OALT=-,-,GT,TC;OID=.,.,.,.;OMAPALT=CTTTTTTG,CTTTTTTTG,CTTTTTTTGT,TCTTTTTTTG;OPOS=430369,430369,430376,430368;OREF=TT,T,TG,CT;QD=25.8121;RBI=0.0963208,0.18541,0.0…	GT:GQ:DP:FDP:RO:FRO:AO:FAO:AF:SAR:SAF:SRF:SRR:FSAR:FSAF:FSRF:FSRR	1/2:7:119:114:16:0:16,70,5,3:2,112,0,0:0.0175439,0.982456,0,0:12,31,0,3:4,39,5,0:10:6:0,55,0,0:2,57,0,0:0:0
S000003265	YGR033C	TIM21	Translocase of the Inner Mitochondrial membrane	FMP17	Nonessential component of the TIM23 complex	Nonessential component of the TIM23 complex; interacts with the Translocase of the Outer Mitochondrial membrane (TOM complex) and with respiratory enzymes; may regulate the Translocase of the Inner Mitochondrial membrane (TIM23 complex) activity	239	27228	YGR033C	chr07	556781	.	GGC	G,GG,GGG	901.783	PASS	AF=0,1,0;AO=19,53,23;DP=110;FAO=0,94,0;FDP=94;FR=.;FRO=0;FSAF=0,39,0;FSAR=0,55,0;FSRF=0;FSRR=0;FWDB=-0.0486826,0.00177498,0.051602;FXX=0.153139;HRUN=4,4,4;LEN=2,1,1;MLLD=11.3378,13.858,4.08306;OALT=-,-,G;OID=.,.,.;OMAPALT=G,GG,GGG;OPOS=556782,556783,556783;OREF=GC,C,C;QD=38.3737;RBI=0.0922747,0.209332,0.32348;REFB=-0.00720866,-0.00955991,-0.0105574;REVB=-0.0783876,0.209325,0.319338;RO=13;SAF=1,33…	GT:GQ:DP:FDP:RO:FRO:AO:FAO:AF:SAR:SAF:SRF:SRR:FSAR:FSAF:FSRF:FSRR	2/2:4:110:94:13:0:19,53,23:0,94,0:0,1,0:18,20,22:1,33,1:2:11:0,55,0:0,39,0:0:0
S000000280	YBR076W	ECM8	ExtraCellular Mutant	None	Non-essential protein of unknown function	Non-essential protein of unknown function	354	41783.1	YBR076W	chr02	390540	.	TGC	TC,TCA,TTC	2609.33	PASS	AF=0.988372,0.00581395,0.00581395;AO=159,10,4;DP=174;FAO=170,1,1;FDP=172;FR=.;FRO=0;FSAF=104,1,1;FSAR=66,0,0;FSRF=0;FSRR=0;FWDB=-0.00951562,-0.014265,-0.0134765;FXX=0.0114936;HRUN=1,1,1;LEN=1,2,1;MLLD=124.429,100.932,101.161;OALT=-,CA,T;OID=.,.,.;OMAPALT=TC,TCA,TTC;OPOS=390541,390541,390541;OREF=G,GC,G;QD=60.682;RBI=0.00961798,0.0142776,0.0137615;REFB=0,0,0;REVB=-0.00139948,-0.000599182,0.0027858…	GT:GQ:DP:FDP:RO:FRO:AO:FAO:AF:SAR:SAF:SRF:SRR:FSAR:FSAF:FSRF:FSRR	1/1:7:174:172:0:0:159,10,4:170,1,1:0.988372,0.00581395,0.00581395:65,0,1:94,10,3:0:0:66,0,0:104,1,1:0:0
S000001800	YKR092C	SRP40	Serine Rich Protein	None	Nucleolar serine-rich protein	Nucleolar serine-rich protein; role in preribosome assembly or transport; may function as a chaperone of small nucleolar ribonucleoprotein particles (snoRNPs); immunologically and structurally to rat Nopp140	406	40971.7	YKR092C	chr11	622631	.	ACTGCAGTCACTGCTGTCACTGCTG	A	2157.66	PASS	AF=1;AO=130;DP=145;FAO=135;FDP=135;FR=.;FRO=0;FSAF=67;FSAR=68;FSRF=0;FSRR=0;FWDB=0.0463142;FXX=0.0816271;HRUN=1;LEN=24;MLLD=700.389;OALT=-;OID=.;OMAPALT=A;OPOS=622632;OREF=CTGCAGTCACTGCTGTCACTGCTG;QD=63.9307;RBI=0.0549265;REFB=0;REVB=0.0295281;RO=0;SAF=62;SAR=68;SRF=0;SRR=0;SSEN=0;SSEP=0;SSSB=-4.98983e-08;STB=0.5;STBP=1;TYPE=del;VARB=4.04317e-05;ANN=A|disruptive_inframe_deletion|MODERATE|YKR092C|…	GT:GQ:DP:FDP:RO:FRO:AO:FAO:AF:SAR:SAF:SRF:SRR:FSAR:FSAF:FSRF:FSRR	1/1:11:145:135:0:0:130:135:1:68:62:0:0:68:67:0:0
S000005875	YOR348C	PUT4	Proline UTilization	proline permease PUT4	Proline permease	Proline permease; required for high-affinity transport of proline; also transports the toxic proline analog azetidine-2-carboxylate (AzC); PUT4 transcription is repressed in ammonia-grown cells	627	68789.1	YOR348C	chr15	987144	.	C	A	2592.36	PASS	AF=1;AO=114;DP=166;FAO=167;FDP=167;FR=.,HEALED;FRO=0;FSAF=86;FSAR=81;FSRF=0;FSRR=0;FWDB=0.0995548;FXX=0;HRUN=1;LEN=1;MLLD=235.166;OALT=A;OID=.;OMAPALT=A;OPOS=987144;OREF=C;QD=62.0924;RBI=0.0997744;REFB=0;REVB=0.00661615;RO=0;SAF=37;SAR=77;SRF=0;SRR=0;SSEN=0;SSEP=0;SSSB=3.6832e-08;STB=0.5;STBP=1;TYPE=snp;VARB=0.000553691;ANN=A|missense_variant|MODERATE|YOR348C|YOR348C|transcript|TRANSCRIPT_YOR348C…	GT:GQ:DP:FDP:RO:FRO:AO:FAO:AF:SAR:SAF:SRF:SRR:FSAR:FSAF:FSRF:FSRR	1/1:14:166:167:0:0:114:167:1:77:37:0:0:81:86:0:0
S000000420	YBR216C	YBP1	Yap1-Binding Protein	None	Protein involved in cellular response to oxidative stress	Protein involved in cellular response to oxidative stress; required for oxidation of specific cysteine residues of transcription factor Yap1p, resulting in nuclear localization of Yap1p in response to stress; YBP1 has a paralog, YBP2, that arose from the whole genome duplication	674	77730.1	YBR216C	chr02	663081	.	A	AG,AGG	1939.11	PASS	AF=1,0;AO=163,12;DP=202;FAO=190,0;FDP=190;FR=.;FRO=0;FSAF=92,0;FSAR=98,0;FSRF=0;FSRR=0;FWDB=0.0908318,0.0447901;FXX=0.00523533;HRUN=5,5;LEN=1,2;MLLD=13.2954,8.75185;OALT=G,GG;OID=.,.;OMAPALT=AG,AGG;OPOS=663082,663082;OREF=-,-;QD=40.8235;RBI=0.141813,0.0710585;REFB=-0.00164214,-0.00289623;REVB=-0.108906,-0.0551649;RO=26;SAF=80,1;SAR=83,11;SRF=17;SRR=9;SSEN=0,0;SSEP=0,0;SSSB=-0.0423937,-0.669999;ST…	GT:GQ:DP:FDP:RO:FRO:AO:FAO:AF:SAR:SAF:SRF:SRR:FSAR:FSAF:FSRF:FSRR	1/1:10:202:190:26:0:163,12:190,0:1,0:83,11:80,1:17:9:98,0:92,0:0:0
S000004428	YLR436C	ECM30	ExtraCellular Mutant	None	Protein of unknown function	Protein of unknown function; may play a role in cell wall biosynthesis, mutants have abormal relative levels of mannose and glucose and have Gap1p sorting and transport defects; (GFP)-fusion protein localizes to the cytoplasm	1274	145053	YLR436C	chr12	1004866	.	C	CA	2397.07	PASS	AF=1;AO=159;DP=163;FAO=161;FDP=161;FR=.;FRO=0;FSAF=82;FSAR=79;FSRF=0;FSRR=0;FWDB=0.0954778;FXX=0;HRUN=1;LEN=1;MLLD=29.2546;OALT=A;OID=.;OMAPALT=CA;OPOS=1004867;OREF=-;QD=59.5544;RBI=0.10908;REFB=0;REVB=-0.0527484;RO=3;SAF=80;SAR=79;SRF=1;SRR=2;SSEN=0;SSEP=0;SSSB=0.00598153;STB=0.5;STBP=1;TYPE=ins;VARB=0.000304178;ANN=CA|frameshift_variant|HIGH|YLR436C|YLR436C|transcript|TRANSCRIPT_YLR436C|protein…	GT:GQ:DP:FDP:RO:FRO:AO:FAO:AF:SAR:SAF:SRF:SRR:FSAR:FSAF:FSRF:FSRR	1/1:14:163:161:3:0:159:161:1:79:80:1:2:79:82:0:0
S000003321	YGR089W	NNF2	None	None	Protein that exhibits physical and genetic interactions with Rpb8p	Protein that exhibits physical and genetic interactions with Rpb8p; Rpb8p is a subunit of RNA polymerases I, II, and III; computational analysis of large-scale protein-protein interaction data suggests a role in chromosome segregation	936	106477	YGR089W	chr07	664622	.	AAA	AGG	2423.04	PASS	AF=0.981707;AO=147;DP=166;FAO=161;FDP=164;FR=.;FRO=3;FSAF=92;FSAR=69;FSRF=3;FSRR=0;FWDB=0.0288059;FXX=0.0120475;HRUN=7;LEN=2;MLLD=78.8561;OALT=GG;OID=.;OMAPALT=AGG;OPOS=664623;OREF=AA;QD=59.0985;RBI=0.0303255;REFB=-0.148396;REVB=-0.00947942;RO=0;SAF=80;SAR=67;SRF=0;SRR=0;SSEN=0;SSEP=0;SSSB=0;STB=0.50802;STBP=0.168;TYPE=mnp;VARB=0.00249152;ANN=AGG|missense_variant|MODERATE|YGR089W|YGR089W|transcri…	GT:GQ:DP:FDP:RO:FRO:AO:FAO:AF:SAR:SAF:SRF:SRR:FSAR:FSAF:FSRF:FSRR	1/1:3:166:164:0:3:147:161:0.981707:67:80:0:0:69:92:3:0
S000004000	YLR010C	TEN1	TElomeric pathways with STn1	None	Protein that regulates telomeric length	Protein that regulates telomeric length; protects telomeric ends in a complex with Cdc13p and Stn1p; similar to human Ten1 which is critical for the telomeric function of the CST (Cdc13p-Stn1p-Ten1p) complex	160	18604.8	YLR010C	chr12	168497	.	A	AT	3274.81	PASS	AF=1;AO=212;DP=217;FAO=214;FDP=214;FR=.;FRO=0;FSAF=93;FSAR=121;FSRF=0;FSRR=0;FWDB=-0.0363747;FXX=0.00465095;HRUN=1;LEN=1;MLLD=31.4675;OALT=T;OID=.;OMAPALT=AT;OPOS=168498;OREF=-;QD=61.2114;RBI=0.0465242;REFB=0;REVB=-0.0290065;RO=2;SAF=92;SAR=120;SRF=1;SRR=1;SSEN=0;SSEP=0;SSSB=-0.00119652;STB=0.5;STBP=1;TYPE=ins;VARB=-0.000448445;ANN=AT|frameshift_variant|HIGH|YLR010C|YLR010C|transcript|TRANSCRIPT_…	GT:GQ:DP:FDP:RO:FRO:AO:FAO:AF:SAR:SAF:SRF:SRR:FSAR:FSAF:FSRF:FSRR	1/1:18:217:214:2:0:212:214:1:120:92:1:1:121:93:0:0
S000005822	YOR296W	None	None	None	Putative protein of unknown function	Putative protein of unknown function; green fluorescent protein (GFP)-fusion protein localizes to the cytoplasm; expressed during copper starvation; YOR296W is not an essential gene	1289	147443	YOR296W	chr15	867843	.	GGAAAAAAAT	GAAAAAAT,GGAAAAAAT,GGAAAAAATA,GGAAAAAT	644.755	PASS	AF=0,0.992806,0,0;AO=6,69,3,7;DP=139;FAO=0,138,0,0;FDP=139;FR=.;FRO=1;FSAF=0,59,0,0;FSAR=0,79,0,0;FSRF=0;FSRR=1;FWDB=0.0296651,0.15827,0.000499436,0.0832349;FXX=0;HRUN=2,7,7,7;LEN=2,1,2,2;MLLD=20.4505,7.94476,131.174,9.85578;OALT=-,-,TA,-;OID=.,.,.,.;OMAPALT=GAAAAAAT,GGAAAAAAT,GGAAAAAATA,GGAAAAAT;OPOS=867844,867845,867851,867845;OREF=GA,A,AT,AA;QD=18.5541;RBI=0.0626759,0.221818,0.0149969,0.114415…	GT:GQ:DP:FDP:RO:FRO:AO:FAO:AF:SAR:SAF:SRF:SRR:FSAR:FSAF:FSRF:FSRR	0/2:8:139:139:47:1:6,69,3,7:0,138,0,0:0,0.992806,0,0:6,44,0,2:0,25,3,5:24:23:0,79,0,0:0,59,0,0:0:1
S000004936	YMR317W	None	None	None	Putative protein of unknown function	Putative protein of unknown function; has some similarity to sialidase from Trypanosoma; YMR317W is not an essential gene	1140	113166	YMR317W	chr13	919133	.	A	AC,C	3143.76	PASS	AF=1,0;AO=204,8;DP=214;FAO=204,0;FDP=204;FR=.;FRO=0;FSAF=101,0;FSAR=103,0;FSRF=0;FSRR=0;FWDB=-0.0114207,-0.012051;FXX=0.00487781;HRUN=0,6;LEN=1,1;MLLD=191.526,160.123;OALT=C,C;OID=.,.;OMAPALT=AC,C;OPOS=919134,919133;OREF=-,A;QD=61.6423;RBI=0.011455,0.0121846;REFB=0,0;REVB=0.000885321,-0.00179912;RO=2;SAF=102,2;SAR=102,6;SRF=1;SRR=1;SSEN=0,0;SSEP=0,0;SSSB=0,-0.108557;STB=0.5,0.5;STBP=1,1;TYPE=ins,…	GT:GQ:DP:FDP:RO:FRO:AO:FAO:AF:SAR:SAF:SRF:SRR:FSAR:FSAF:FSRF:FSRR	1/1:17:214:204:2:0:204,8:204,0:1,0:102,6:102,2:1:1:103,0:101,0:0:0
S000003859	YJR098C	None	None	None	Putative protein of unknown function	Putative protein of unknown function; the authentic, non-tagged protein is detected in highly purified mitochondria in high-throughput studies	656	74233.8	YJR098C	chr10	628416	.	G	GT,T	2534.78	PASS	AF=0.976879,0.0231214;AO=160,4;DP=182;FAO=169,4;FDP=173;FR=.;FRO=0;FSAF=78,2;FSAR=91,2;FSRF=0;FSRR=0;FWDB=0.125294,0.0250648;FXX=0.0057468;HRUN=2,2;LEN=1,1;MLLD=27.1514,7.12285;OALT=T,T;OID=.,.;OMAPALT=GT,T;OPOS=628417,628416;OREF=-,G;QD=58.6076;RBI=0.170347,0.0453531;REFB=0,0;REVB=-0.115409,-0.0377976;RO=15;SAF=74,2;SAR=86,2;SRF=5;SRR=10;SSEN=0,0;SSEP=0,0;SSSB=0.0211484,0.191181;STB=0.5,0.5;STBP…	GT:GQ:DP:FDP:RO:FRO:AO:FAO:AF:SAR:SAF:SRF:SRR:FSAR:FSAF:FSRF:FSRR	1/2:3:182:173:15:0:160,4:169,4:0.976879,0.0231214:86,2:74,2:5:10:91,2:78,2:0:0
S000003977	YLL054C	None	None	None	Putative protein of unknown function with similarity to Pip2p	Putative protein of unknown function with similarity to Pip2p; an oleate-specific transcriptional activator of peroxisome proliferation; YLL054C is not an essential gene	843	97601	YLL054C	chr12	34586	.	AAATATTCCAAACTTAGAATGTCAGAATCTCCTTCTGGAATC	A	972.683	PASS	AF=1;AO=64;DP=69;FAO=66;FDP=66;FR=.;FRO=0;FSAF=35;FSAR=31;FSRF=0;FSRR=0;FWDB=0.00998755;FXX=0.043472;HRUN=3;LEN=41;MLLD=1323.08;OALT=-;OID=.;OMAPALT=A;OPOS=34587;OREF=AATATTCCAAACTTAGAATGTCAGAATCTCCTTCTGGAATC;QD=58.9505;RBI=0.0175599;REFB=0;REVB=0.014443;RO=0;SAF=33;SAR=31;SRF=0;SRR=0;SSEN=0;SSEP=0;SSSB=0;STB=0.5;STBP=1;TYPE=del;VARB=6.91285e-06;ANN=A|frameshift_variant|HIGH|YLL054C|YLL054C|trans…	GT:GQ:DP:FDP:RO:FRO:AO:FAO:AF:SAR:SAF:SRF:SRR:FSAR:FSAF:FSRF:FSRR	1/1:5:69:66:0:0:64:66:1:31:33:0:0:31:35:0:0
S000001681	YKL198C	PTK1	Putative serine/Threonine protein Kinase	putative serine/threonine protein kinase PTK1 YKL199C YKT9 POT1 KKT8 STK1	Putative serine/threonine protein kinase	Putative serine/threonine protein kinase; regulates spermine uptake; involved in polyamine transport; possible mitochondrial protein; PTK1 has a paralog, PTK2, that arose from the whole genome duplication	662	73520.4	YKL198C	chr11	68407	.	AC	A	3103.17	PASS	AF=1;AO=193;DP=199;FAO=196;FDP=196;FR=.;FRO=0;FSAF=90;FSAR=106;FSRF=0;FSRR=0;FWDB=0.0193288;FXX=0.0150746;HRUN=2;LEN=1;MLLD=33.4019;OALT=-;OID=.;OMAPALT=A;OPOS=68408;OREF=C;QD=63.33;RBI=0.14654;REFB=0;REVB=-0.14526;RO=0;SAF=87;SAR=106;SRF=0;SRR=0;SSEN=0;SSEP=0;SSSB=0;STB=0.5;STBP=1;TYPE=del;VARB=-0.000664151;ANN=A|frameshift_variant|HIGH|YKL198C|YKL198C|transcript|TRANSCRIPT_YKL198C|protein_codin…	GT:GQ:DP:FDP:RO:FRO:AO:FAO:AF:SAR:SAF:SRF:SRR:FSAR:FSAF:FSRF:FSRR	1/1:17:199:196:0:0:193:196:1:106:87:0:0:106:90:0:0
S000003329	YGR097W	ASK10	Activator of SKn7	RGC2	Regulator of the Fps1p glycerol channel	Regulator of the Fps1p glycerol channel; under nonstress conditions, binds to Fps1p to positively regulate glycerol transport; under osmotic stress, multiple phosphorylation by Hog1p causes Ask10p to dissociate from Fps1p; forms homodimers and heterodimerizes with paralog Rgc1p; phosphorylated in response to oxidative stress; has a role in destruction of Ssn8p; associates with RNA polymerase II h…	1146	126895	YGR097W	chr07	687198	.	C	CA	3083.37	PASS	AF=1;AO=198;DP=204;FAO=200;FDP=200;FR=.;FRO=0;FSAF=100;FSAR=100;FSRF=0;FSRR=0;FWDB=0.0119708;FXX=0.0147776;HRUN=0;LEN=1;MLLD=106.271;OALT=A;OID=.;OMAPALT=CA;OPOS=687199;OREF=-;QD=61.6674;RBI=0.0123113;REFB=0;REVB=0.00287536;RO=5;SAF=99;SAR=99;SRF=1;SRR=4;SSEN=0;SSEP=0;SSSB=0.0140648;STB=0.5;STBP=1;TYPE=ins;VARB=-4.06416e-05;ANN=CA|frameshift_variant|HIGH|YGR097W|YGR097W|transcript|TRANSCRIPT_YGR0…	GT:GQ:DP:FDP:RO:FRO:AO:FAO:AF:SAR:SAF:SRF:SRR:FSAR:FSAF:FSRF:FSRR	1/1:17:204:200:5:0:198:200:1:99:99:1:4:100:100:0:0
S000002149	YBL100W-B	None	None	gag-pol fusion protein YBL101W-B TY2B_B	Retrotransposon TYA Gag and TYB Pol genes	Retrotransposon TYA Gag and TYB Pol genes; transcribed/translated as one unit; polyprotein is processed to make a nucleocapsid-like protein (Gag), reverse transcriptase (RT), protease (PR), and integrase (IN); similar to retroviral genes	1770	202216	YBL100W-B	chr02	30751	.	G	A	649.88	PASS	AF=1;AO=41;DP=41;FAO=42;FDP=42;FR=.;FRO=0;FSAF=25;FSAR=17;FSRF=0;FSRR=0;FWDB=0.0280603;FXX=0;HRUN=1;LEN=1;MLLD=190.284;OALT=A;OID=.;OMAPALT=A;OPOS=30751;OREF=G;QD=61.8933;RBI=0.0451449;REFB=0;REVB=0.035365;RO=0;SAF=24;SAR=17;SRF=0;SRR=0;SSEN=0;SSEP=0;SSSB=-6.2194e-08;STB=0.5;STBP=1;TYPE=snp;VARB=0.000348386;ANN=A|missense_variant|MODERATE|YBL100W-A|GENE_YBL100W-A|transcript|YBL100W-A|protein_codi…	GT:GQ:DP:FDP:RO:FRO:AO:FAO:AF:SAR:SAF:SRF:SRR:FSAR:FSAF:FSRF:FSRR	1/1:4:41:42:0:0:41:42:1:17:24:0:0:17:25:0:0
S000002148	YBL100W-A	None	None	gag protein TY2A_B YBL101W-A	Retrotransposon TYA Gag gene co-transcribed with TYB Pol	Retrotransposon TYA Gag gene co-transcribed with TYB Pol; translated as TYA or TYA-TYB polyprotein; Gag is a nucleocapsid protein that is the structural constituent of virus-like particles (VLPs); similar to retroviral Gag	438	49897.1	YBL100W-A	chr02	30751	.	G	A	649.88	PASS	AF=1;AO=41;DP=41;FAO=42;FDP=42;FR=.;FRO=0;FSAF=25;FSAR=17;FSRF=0;FSRR=0;FWDB=0.0280603;FXX=0;HRUN=1;LEN=1;MLLD=190.284;OALT=A;OID=.;OMAPALT=A;OPOS=30751;OREF=G;QD=61.8933;RBI=0.0451449;REFB=0;REVB=0.035365;RO=0;SAF=24;SAR=17;SRF=0;SRR=0;SSEN=0;SSEP=0;SSSB=-6.2194e-08;STB=0.5;STBP=1;TYPE=snp;VARB=0.000348386;ANN=A|missense_variant|MODERATE|YBL100W-A|GENE_YBL100W-A|transcript|YBL100W-A|protein_codi…	GT:GQ:DP:FDP:RO:FRO:AO:FAO:AF:SAR:SAF:SRF:SRR:FSAR:FSAF:FSRF:FSRR	1/1:4:41:42:0:0:41:42:1:17:24:0:0:17:25:0:0
S000006068	YPL147W	PXA1	PeroXisomal ABC-transporter	LPI1 PAL1 PAT2 SSH2 ATP-binding cassette long-chain fatty acid transporter PXA1	Subunit of heterodimeric peroxisomal ABC transport complex, with Pxa2p	Subunit of heterodimeric peroxisomal ABC transport complex, with Pxa2p; required for import of long-chain fatty acids into peroxisomes; similar to human adrenoleukodystrophy transporters ABCD1and ABCD2, and ALD-related proteins; mutations in ABCD1 cause X-linked adrenoleukodystrophy (X-ALD), a peroxisomal disorder; human ABCD1 and ABCD2 can each partially complement yeast pxa1 pxa2 double null mu…	870	100058	YPL147W	chr16	275245	.	A	AC	2869.94	PASS	AF=1;AO=183;DP=189;FAO=184;FDP=184;FR=.;FRO=0;FSAF=86;FSAR=98;FSRF=0;FSRR=0;FWDB=-0.0630078;FXX=0.0107521;HRUN=1;LEN=1;MLLD=31.3202;OALT=C;OID=.;OMAPALT=AC;OPOS=275246;OREF=-;QD=62.39;RBI=0.0918121;REFB=0;REVB=0.0667793;RO=3;SAF=85;SAR=98;SRF=0;SRR=3;SSEN=0;SSEP=0;SSSB=0.0143492;STB=0.5;STBP=1;TYPE=ins;VARB=2.60265e-05;ANN=AC|frameshift_variant|HIGH|YPL147W|YPL147W|transcript|TRANSCRIPT_YPL147W|p…	GT:GQ:DP:FDP:RO:FRO:AO:FAO:AF:SAR:SAF:SRF:SRR:FSAR:FSAF:FSRF:FSRR	1/1:16:189:184:3:0:183:184:1:98:85:0:3:98:86:0:0
S000004085	YLR095C	IOC2	Iswi One Complex	None	Subunit of the Isw1b complex	Subunit of the Isw1b complex; exhibits nucleosome-stimulated ATPase activity and acts within coding regions to coordinate transcription elongation with termination and processing; contains a PHD finger motif; other complex members are Isw1p and Ioc4p	812	93424.9	YLR095C	chr12	330654	.	TGTTGT	TGT,TGTTGC,TGTTGCTGT	2110.15	PASS	AF=0.00735294,0.0220588,0.970588;AO=9,4,122;DP=138;FAO=1,3,132;FDP=136;FR=.;FRO=0;FSAF=1,0,58;FSAR=0,3,74;FSRF=0;FSRR=0;FWDB=0.00491155,0.00685339,0.00553084;FXX=0.0144917;HRUN=2,2,0;LEN=3,1,3;MLLD=304.745,88.2918,314.372;OALT=-,C,TGC;OID=.,.,.;OMAPALT=TGT,TGTTGC,TGTTGCTGT;OPOS=330655,330659,330657;OREF=GTT,T,-;QD=62.0633;RBI=0.0230881,0.016791,0.0234399;REFB=0,0,0;REVB=0.0225596,-0.0153287,0.022…	GT:GQ:DP:FDP:RO:FRO:AO:FAO:AF:SAR:SAF:SRF:SRR:FSAR:FSAF:FSRF:FSRR	2/3:4:138:136:0:0:9,4,122:1,3,132:0.00735294,0.0220588,0.970588:5,3,68:4,1,54:0:0:0,3,74:1,0,58:0:0
S000006235	YPR031W	NTO1	NuA Three Orf	None	Subunit of the NuA3 histone acetyltransferase complex	Subunit of the NuA3 histone acetyltransferase complex; this complex acetylates histone H3; contains PHD finger domain that interacts with methylated histone H3	748	86032.4	YPR031W	chr16	633350	.	ATT	A,AT	1032.63	PASS	AF=0,1;AO=15,113;DP=172;FAO=0,172;FDP=172;FR=.;FRO=0;FSAF=0,90;FSAR=0,82;FSRF=0;FSRR=0;FWDB=0.0737833,0.14438;FXX=0;HRUN=7,7;LEN=2,1;MLLD=8.90648,8.0078;OALT=-,-;OID=.,.;OMAPALT=A,AT;OPOS=633351,633351;OREF=TT,T;QD=24.0147;RBI=0.0777564,0.150198;REFB=0.0107352,0.00671176;REVB=0.0245375,0.0413994;RO=35;SAF=7,64;SAR=8,49;SRF=14;SRR=21;SSEN=0,0;SSEP=0,0;SSSB=0.0785122,0.0742781;STB=0.5,0.5;STBP=1,1;…	GT:GQ:DP:FDP:RO:FRO:AO:FAO:AF:SAR:SAF:SRF:SRR:FSAR:FSAF:FSRF:FSRR	2/2:5:172:172:35:0:15,113:0,172:0,1:8,49:7,64:14:21:0,82:0,90:0:0
S000002476	YDR069C	DOA4	Degradation Of Alpha	NPI2 UBP4 ubiquitin-specific protease DOA4 DOS1 SSV7 MUT4	Ubiquitin hydrolase	Ubiquitin hydrolase; deubiquitinates intralumenal vesicle (ILVs) cargo proteins; required for recycling ubiquitin from proteasome-bound ubiquitinated intermediates, acts at the late endosome/prevacuolar compartment to recover ubiquitin from ubiquitinated membrane proteins destined for the vacuole; DOA4 has a paralog, UBP5, that arose from the whole genome duplication	926	105201	YDR069C	chr04	595863	.	G	T	1540.58	PASS	AF=1;AO=103;DP=103;FAO=103;FDP=103;FR=.;FRO=0;FSAF=55;FSAR=48;FSRF=0;FSRR=0;FWDB=0.0330214;FXX=0;HRUN=1;LEN=1;MLLD=154.19;OALT=T;OID=.;OMAPALT=T;OPOS=595863;OREF=G;QD=59.8283;RBI=0.0334283;REFB=0;REVB=-0.00520005;RO=0;SAF=55;SAR=48;SRF=0;SRR=0;SSEN=0;SSEP=0;SSSB=0;STB=0.5;STBP=1;TYPE=snp;VARB=5.69669e-05;ANN=T|stop_gained|HIGH|YDR069C|YDR069C|transcript|TRANSCRIPT_YDR069C|protein_coding|1/1|c.986…	GT:GQ:DP:FDP:RO:FRO:AO:FAO:AF:SAR:SAF:SRF:SRR:FSAR:FSAF:FSRF:FSRR	1/1:9:103:103:0:0:103:103:1:48:55:0:0:48:55:0:0
S000001392	YIL130W	ASG1	Activator of Stress Genes	None	Zinc cluster protein proposed to be a transcriptional regulator	Zinc cluster protein proposed to be a transcriptional regulator; regulator involved in the stress response; null mutants have a respiratory deficiency, calcofluor white sensitivity and slightly increased cycloheximide resistance	964	108770	YIL130W	chr09	106879	.	A	AAAT,AAT,T	1645.66	PASS	AF=0.991071,0,0;AO=85,18,4;DP=130;FAO=111,0,0;FDP=112;FR=.;FRO=1;FSAF=46,0,0;FSAR=65,0,0;FSRF=1;FSRR=0;FWDB=-0.0481414,-0.0632722,-0.0539154;FXX=0.0344798;HRUN=5,5,5;LEN=3,2,1;MLLD=209.431,195.28,156.888;OALT=AAT,AT,T;OID=.,.,.;OMAPALT=AAAT,AAT,T;OPOS=106880,106880,106879;OREF=-,-,A;QD=58.7736;RBI=0.0482218,0.0633863,0.0579565;REFB=-0.0163923,0.0373321,0.0579517;REVB=0.00278446,-0.00380253,-0.021…	GT:GQ:DP:FDP:RO:FRO:AO:FAO:AF:SAR:SAF:SRF:SRR:FSAR:FSAF:FSRF:FSRR	1/1:5:130:112:19:1:85,18,4:111,0,0:0.991071,0,0:57,5,2:28,13,2:14:5:65,0,0:46,0,0:1:0
S000002390	YDL231C	BRE4	BREfeldin A sensitivity	None	Zinc finger protein containing five transmembrane domains	Zinc finger protein containing five transmembrane domains; null mutant exhibits strongly fragmented vacuoles and sensitivity to brefeldin A, a drug which is known to affect intracellular transport	1125	129751	YDL231C	chr04	41329	.	CCAAAAC	CAAAC,CCAAA,CCAAAC	1165.51	PASS	AF=0,0,0.993976;AO=37,9,76;DP=177;FAO=0,0,165;FDP=166;FR=.;FRO=1;FSAF=0,0,67;FSAR=0,0,98;FSRF=1;FSRR=0;FWDB=0.114115,-0.05999,0.119356;FXX=0.00598767;HRUN=3,4,4;LEN=2,2,1;MLLD=14.4832,67.8181,10.8453;OALT=-,-,-;OID=.,.,.;OMAPALT=CAAAC,CCAAA,CCAAAC;OPOS=41330,41334,41331;OREF=CA,AC,A;QD=28.0846;RBI=0.202969,0.0604669,0.224021;REFB=0.10413,0.0400201,-0.0274064;REVB=-0.167851,0.00757909,0.189577;RO=…	GT:GQ:DP:FDP:RO:FRO:AO:FAO:AF:SAR:SAF:SRF:SRR:FSAR:FSAF:FSRF:FSRR	0/3:6:177:166:49:1:37,9,76:0,0,165:0,0,0.993976:36,0,32:1,9,44:14:35:0,0,98:0,0,67:1:0
